# Supplementary material for: TASEP modelling provides a parsimonious explanation for the ability of a single uORF to derepress translation during the integrated stress response
Source: eLife journal article supplement (doi:10.7554/elife.32563), 2018-06-22
Supplement: supp [file elife-32563-supp-v1.zip]

Archive with 18 entries (18 files):
- elife_poa_e32563_Figure_7_source_data_1.csv
- elife_poa_e32563_Figure_2_source_data_1.txt
- elife_poa_e32563_Figure_6_source_data_1.txt
- elife_poa_e32563_Figure_2_source_data_2.txt
- elife_poa_e32563_Figure_3_source_data_2.txt
- elife_poa_e32563_Figure_6_source_data_1.txt
- elife_poa_e32563_Figure_3_source_data_1.txt
- elife_poa_e32563_Transparent_Reporting_File.pdf
- elife_poa_e32563_Figure_4_source_data_3.txt
- elife_poa_e32563_Figure_5_source_data_2.txt
- elife_poa_e32563_Figure_4_source_data_1.txt
- elife_poa_e32563_Figure_4_source_data_2.txt
- elife_poa_e32563_Supplementary_file_1.txt
- elife_poa_e32563_Supplementary_file_2.csv
- elife_poa_e32563_Figure_6_source_data_3.txt
- elife_poa_e32563_Figure_6_source_data_2.txt
- elife_poa_e32563_Figure_4_source_data_4.txt
- elife_poa_e32563_Figure_5_source_data_1.txt
