# Supplementary material for: TASEP modelling provides a parsimonious explanation for the ability of a single uORF to derepress translation during the integrated stress response
Source: eLife journal article supplement (doi:10.7554/elife.32563), 2018-06-22
Supplement: supp [file elife-32563-supp-v1.zip › elife_poa_e32563_Figure_2_source_data_1.txt]

   0.0000000e+00   0.0000000e+00   0.0000000e+00   0.0000000e+00   0.0000000e+00   0.0000000e+00   0.0000000e+00   0.0000000e+00   0.0000000e+00   0.0000000e+00
   5.0000000e-03   2.2338710e+02   9.5652174e+02   8.3962264e+01   7.1921182e+01   4.8148148e+01   3.0876747e+01   2.6519337e+01   2.1593448e+01   2.2704800e+01
   1.0000000e-02   3.5806452e+02   1.4739130e+03   1.4371069e+02   1.0566502e+02   7.1781305e+01   5.7179161e+01   4.7790055e+01   3.6038719e+01   3.9726756e+01
   1.5000000e-02   3.7177419e+02   1.5478261e+03   1.7672956e+02   1.3472906e+02   9.8941799e+01   7.3951715e+01   5.5985267e+01   5.0781832e+01   5.2628781e+01
   2.0000000e-02   3.5161290e+02   1.5000000e+03   1.7515723e+02   1.4187192e+02   1.1816578e+02   9.1867853e+01   6.8692449e+01   6.1355175e+01   6.3085429e+01
   2.5000000e-02   3.4435484e+02   1.3000000e+03   1.9276730e+02   1.5197044e+02   1.2504409e+02   9.3138501e+01   7.7071823e+01   7.2896500e+01   7.1766520e+01
   3.0000000e-02   3.3064516e+02   1.2913043e+03   1.8522013e+02   1.6083744e+02   1.1481481e+02   9.4536213e+01   8.1860037e+01   7.1109456e+01   7.6811440e+01
   3.5000000e-02   2.8870968e+02   8.7826087e+02   1.6729560e+02   1.5541872e+02   1.1940035e+02   9.6442186e+01   8.6924494e+01   7.9597915e+01   8.2839828e+01
   4.0000000e-02   2.7661290e+02   7.4782609e+02   1.6257862e+02   1.4482759e+02   1.2151675e+02   1.0203304e+02   8.9318600e+01   7.9895756e+01   8.6470682e+01
   4.5000000e-02   2.4516129e+02   6.4782609e+02   1.5628931e+02   1.3793103e+02   1.1552028e+02   1.0355781e+02   8.4714549e+01   8.3693224e+01   9.0239753e+01
   5.0000000e-02   2.1048387e+02   5.4782609e+02   1.3962264e+02   1.2906404e+02   1.1834215e+02   9.9364676e+01   9.4659300e+01   8.7267312e+01   9.2642603e+01
   5.5000000e-02   1.7903226e+02   3.5652174e+02   1.3647799e+02   1.3423645e+02   1.0740741e+02   1.0190597e+02   9.5303867e+01   8.6373790e+01   9.4040721e+01
   6.0000000e-02   1.9032258e+02   2.6521739e+02   1.2012579e+02   1.2684729e+02   1.1252205e+02   9.8729352e+01   1.0147330e+02   8.9650037e+01   9.5497315e+01
   6.5000000e-02   1.6774194e+02   3.1304348e+02   1.3396226e+02   1.1724138e+02   1.1075838e+02   1.0152478e+02   9.6869245e+01   9.3224125e+01   9.6996438e+01
   7.0000000e-02   1.3306452e+02   2.5217391e+02   1.2232704e+02   1.1724138e+02   1.1075838e+02   1.0279543e+02   9.9079190e+01   9.2256143e+01   9.7862953e+01
   7.5000000e-02   1.3709677e+02   2.2173913e+02   1.1918239e+02   1.2783251e+02   1.1234568e+02   1.0520966e+02   1.0018416e+02   9.7915115e+01   9.8383924e+01
   8.0000000e-02   1.0161290e+02   2.3043478e+02   1.3144654e+02   1.1970443e+02   1.0917108e+02   9.9872935e+01   9.8526703e+01   9.3149665e+01   9.8633778e+01
   8.5000000e-02   1.1854839e+02   1.7826087e+02   1.2044025e+02   1.1674877e+02   1.0388007e+02   1.0190597e+02   9.3001842e+01   9.4713328e+01   9.9027165e+01
   9.0000000e-02   1.1370968e+02   1.2173913e+02   1.1132075e+02   1.0049261e+02   1.0370370e+02   1.0038119e+02   1.0147330e+02   9.9627699e+01   9.9308915e+01
   9.5000000e-02   8.5483871e+01   1.3043478e+02   1.1037736e+02   1.1280788e+02   9.7883598e+01   9.7331639e+01   1.0441989e+02   1.0469099e+02   9.9409920e+01
   1.0000000e-01   1.0645161e+02   1.1739130e+02   1.0503145e+02   1.1108374e+02   1.1393298e+02   9.8983482e+01   9.6869245e+01   1.0007446e+02   9.9393972e+01
   1.0500000e-01   1.0887097e+02   1.0000000e+02   1.0911950e+02   1.0738916e+02   1.0194004e+02   1.0101652e+02   9.9447514e+01   9.7096054e+01   9.9569401e+01
   1.1000000e-01   1.0645161e+02   1.4782609e+02   9.5283019e+01   1.0295567e+02   1.0740741e+02   9.8602287e+01   9.7145488e+01   9.7319434e+01   9.9622561e+01
   1.1500000e-01   8.3870968e+01   1.4782609e+02   1.0660377e+02   1.1157635e+02   1.0405644e+02   9.9237611e+01   1.0423573e+02   1.0208488e+02   9.9760778e+01
   1.2000000e-01   8.3064516e+01   1.0434783e+02   9.8427673e+01   1.0147783e+02   9.3474427e+01   1.0139771e+02   9.6869245e+01   1.0126582e+02   9.9776726e+01
   1.2500000e-01   7.3387097e+01   1.2173913e+02   1.0974843e+02   1.1305419e+02   9.7001764e+01   9.9745870e+01   9.7697974e+01   9.7170514e+01   9.9898995e+01
   1.3000000e-01   9.1935484e+01   5.2173913e+01   1.0031447e+02   1.1059113e+02   9.7001764e+01   9.9110546e+01   9.9355433e+01   9.7989576e+01   9.9978736e+01
   1.3500000e-01   9.4354839e+01   1.3043478e+02   1.0251572e+02   1.0467980e+02   1.0000000e+02   1.0152478e+02   1.0524862e+02   1.0268057e+02   9.9856467e+01
   1.4000000e-01   8.5483871e+01   6.9565217e+01   9.8427673e+01   1.0812808e+02   1.0052910e+02   9.9618806e+01   1.0386740e+02   9.6798213e+01   9.9867099e+01
   1.4500000e-01   1.0645161e+02   9.1304348e+01   1.0251572e+02   1.0246305e+02   9.6296296e+01   9.7458704e+01   1.0386740e+02   1.0201042e+02   1.0009037e+02
   1.5000000e-01   1.0161290e+02   1.0869565e+02   9.3396226e+01   1.0714286e+02   1.0299824e+02   1.0393901e+02   9.7145488e+01   9.3819806e+01   9.9893679e+01
   1.5500000e-01   9.1935484e+01   9.5652174e+01   1.1698113e+02   1.0763547e+02   1.0017637e+02   9.4409149e+01   9.5672192e+01   1.0156366e+02   9.9898995e+01
   1.6000000e-01   9.8387097e+01   1.1304348e+02   1.0408805e+02   1.0517241e+02   1.0582011e+02   9.8348158e+01   1.0211786e+02   9.9851080e+01   9.9957472e+01
   1.6500000e-01   8.1451613e+01   1.3043478e+02   1.0188679e+02   1.0123153e+02   9.7530864e+01   9.7839898e+01   9.6961326e+01   9.9627699e+01   1.0000000e+02
   1.7000000e-01   8.4677419e+01   1.0000000e+02   9.3710692e+01   1.0320197e+02   1.0987654e+02   9.9618806e+01   1.0313076e+02   1.0193596e+02   9.9856467e+01
   1.7500000e-01   7.5806452e+01   1.0869565e+02   9.7484277e+01   1.0270936e+02   9.9118166e+01   9.6696315e+01   9.4290976e+01   9.8585257e+01   9.9920259e+01
   1.8000000e-01   8.5483871e+01   7.3913043e+01   1.0471698e+02   1.0073892e+02   9.1181658e+01   9.8221093e+01   9.5856354e+01   9.8957558e+01   9.9909627e+01
   1.8500000e-01   9.3548387e+01   1.1739130e+02   9.2138365e+01   1.0295567e+02   9.5414462e+01   9.0597205e+01   1.0607735e+02   1.0208488e+02   9.9898995e+01
   1.9000000e-01   8.1451613e+01   7.3913043e+01   9.0251572e+01   1.0320197e+02   9.5943563e+01   9.4282084e+01   1.0073665e+02   9.9702159e+01   9.9888363e+01
   1.9500000e-01   8.7903226e+01   6.9565217e+01   9.1194969e+01   1.1428571e+02   9.5590829e+01   9.7712834e+01   9.7882136e+01   9.9180938e+01   9.9930891e+01
   2.0000000e-01   1.0000000e+02   1.0000000e+02   1.0000000e+02   1.0000000e+02   1.0000000e+02   1.0000000e+02   1.0000000e+02   1.0000000e+02   1.0000000e+02
