# Supplementary material for: TASEP modelling provides a parsimonious explanation for the ability of a single uORF to derepress translation during the integrated stress response
Source: eLife journal article supplement (doi:10.7554/elife.32563), 2018-06-22
Supplement: supp [file elife-32563-supp-v1.zip › elife_poa_e32563_Figure_2_source_data_2.txt]

   0.0000000e+00   0.0000000e+00   0.0000000e+00   0.0000000e+00   0.0000000e+00   0.0000000e+00   0.0000000e+00   0.0000000e+00   0.0000000e+00   0.0000000e+00
   5.0000000e-03   2.7700000e-01   2.2000000e-01   2.6700000e-01   2.9200000e-01   2.7300000e-01   2.4300000e-01   2.8800000e-01   2.9000000e-01   8.5420000e-01
   1.0000000e-02   4.4400000e-01   3.3900000e-01   4.5700000e-01   4.2900000e-01   4.0700000e-01   4.5000000e-01   5.1900000e-01   4.8400000e-01   1.4946000e+00
   1.5000000e-02   4.6100000e-01   3.5600000e-01   5.6200000e-01   5.4700000e-01   5.6100000e-01   5.8200000e-01   6.0800000e-01   6.8200000e-01   1.9800000e+00
   2.0000000e-02   4.3600000e-01   3.4500000e-01   5.5700000e-01   5.7600000e-01   6.7000000e-01   7.2300000e-01   7.4600000e-01   8.2400000e-01   2.3734000e+00
   2.5000000e-02   4.2700000e-01   2.9900000e-01   6.1300000e-01   6.1700000e-01   7.0900000e-01   7.3300000e-01   8.3700000e-01   9.7900000e-01   2.7000000e+00
   3.0000000e-02   4.1000000e-01   2.9700000e-01   5.8900000e-01   6.5300000e-01   6.5100000e-01   7.4400000e-01   8.8900000e-01   9.5500000e-01   2.8898000e+00
   3.5000000e-02   3.5800000e-01   2.0200000e-01   5.3200000e-01   6.3100000e-01   6.7700000e-01   7.5900000e-01   9.4400000e-01   1.0690000e+00   3.1166000e+00
   4.0000000e-02   3.4300000e-01   1.7200000e-01   5.1700000e-01   5.8800000e-01   6.8900000e-01   8.0300000e-01   9.7000000e-01   1.0730000e+00   3.2532000e+00
   4.5000000e-02   3.0400000e-01   1.4900000e-01   4.9700000e-01   5.6000000e-01   6.5500000e-01   8.1500000e-01   9.2000000e-01   1.1240000e+00   3.3950000e+00
   5.0000000e-02   2.6100000e-01   1.2600000e-01   4.4400000e-01   5.2400000e-01   6.7100000e-01   7.8200000e-01   1.0280000e+00   1.1720000e+00   3.4854000e+00
   5.5000000e-02   2.2200000e-01   8.2000000e-02   4.3400000e-01   5.4500000e-01   6.0900000e-01   8.0200000e-01   1.0350000e+00   1.1600000e+00   3.5380000e+00
   6.0000000e-02   2.3600000e-01   6.1000000e-02   3.8200000e-01   5.1500000e-01   6.3800000e-01   7.7700000e-01   1.1020000e+00   1.2040000e+00   3.5928000e+00
   6.5000000e-02   2.0800000e-01   7.2000000e-02   4.2600000e-01   4.7600000e-01   6.2800000e-01   7.9900000e-01   1.0520000e+00   1.2520000e+00   3.6492000e+00
   7.0000000e-02   1.6500000e-01   5.8000000e-02   3.8900000e-01   4.7600000e-01   6.2800000e-01   8.0900000e-01   1.0760000e+00   1.2390000e+00   3.6818000e+00
   7.5000000e-02   1.7000000e-01   5.1000000e-02   3.7900000e-01   5.1900000e-01   6.3700000e-01   8.2800000e-01   1.0880000e+00   1.3150000e+00   3.7014000e+00
   8.0000000e-02   1.2600000e-01   5.3000000e-02   4.1800000e-01   4.8600000e-01   6.1900000e-01   7.8600000e-01   1.0700000e+00   1.2510000e+00   3.7108000e+00
   8.5000000e-02   1.4700000e-01   4.1000000e-02   3.8300000e-01   4.7400000e-01   5.8900000e-01   8.0200000e-01   1.0100000e+00   1.2720000e+00   3.7256000e+00
   9.0000000e-02   1.4100000e-01   2.8000000e-02   3.5400000e-01   4.0800000e-01   5.8800000e-01   7.9000000e-01   1.1020000e+00   1.3380000e+00   3.7362000e+00
   9.5000000e-02   1.0600000e-01   3.0000000e-02   3.5100000e-01   4.5800000e-01   5.5500000e-01   7.6600000e-01   1.1340000e+00   1.4060000e+00   3.7400000e+00
   1.0000000e-01   1.3200000e-01   2.7000000e-02   3.3400000e-01   4.5100000e-01   6.4600000e-01   7.7900000e-01   1.0520000e+00   1.3440000e+00   3.7394000e+00
   1.0500000e-01   1.3500000e-01   2.3000000e-02   3.4700000e-01   4.3600000e-01   5.7800000e-01   7.9500000e-01   1.0800000e+00   1.3040000e+00   3.7460000e+00
   1.1000000e-01   1.3200000e-01   3.4000000e-02   3.0300000e-01   4.1800000e-01   6.0900000e-01   7.7600000e-01   1.0550000e+00   1.3070000e+00   3.7480000e+00
   1.1500000e-01   1.0400000e-01   3.4000000e-02   3.3900000e-01   4.5300000e-01   5.9000000e-01   7.8100000e-01   1.1320000e+00   1.3710000e+00   3.7532000e+00
   1.2000000e-01   1.0300000e-01   2.4000000e-02   3.1300000e-01   4.1200000e-01   5.3000000e-01   7.9800000e-01   1.0520000e+00   1.3600000e+00   3.7538000e+00
   1.2500000e-01   9.1000000e-02   2.8000000e-02   3.4900000e-01   4.5900000e-01   5.5000000e-01   7.8500000e-01   1.0610000e+00   1.3050000e+00   3.7584000e+00
   1.3000000e-01   1.1400000e-01   1.2000000e-02   3.1900000e-01   4.4900000e-01   5.5000000e-01   7.8000000e-01   1.0790000e+00   1.3160000e+00   3.7614000e+00
   1.3500000e-01   1.1700000e-01   3.0000000e-02   3.2600000e-01   4.2500000e-01   5.6700000e-01   7.9900000e-01   1.1430000e+00   1.3790000e+00   3.7568000e+00
   1.4000000e-01   1.0600000e-01   1.6000000e-02   3.1300000e-01   4.3900000e-01   5.7000000e-01   7.8400000e-01   1.1280000e+00   1.3000000e+00   3.7572000e+00
   1.4500000e-01   1.3200000e-01   2.1000000e-02   3.2600000e-01   4.1600000e-01   5.4600000e-01   7.6700000e-01   1.1280000e+00   1.3700000e+00   3.7656000e+00
   1.5000000e-01   1.2600000e-01   2.5000000e-02   2.9700000e-01   4.3500000e-01   5.8400000e-01   8.1800000e-01   1.0550000e+00   1.2600000e+00   3.7582000e+00
   1.5500000e-01   1.1400000e-01   2.2000000e-02   3.7200000e-01   4.3700000e-01   5.6800000e-01   7.4300000e-01   1.0390000e+00   1.3640000e+00   3.7584000e+00
   1.6000000e-01   1.2200000e-01   2.6000000e-02   3.3100000e-01   4.2700000e-01   6.0000000e-01   7.7400000e-01   1.1090000e+00   1.3410000e+00   3.7606000e+00
   1.6500000e-01   1.0100000e-01   3.0000000e-02   3.2400000e-01   4.1100000e-01   5.5300000e-01   7.7000000e-01   1.0530000e+00   1.3380000e+00   3.7622000e+00
   1.7000000e-01   1.0500000e-01   2.3000000e-02   2.9800000e-01   4.1900000e-01   6.2300000e-01   7.8400000e-01   1.1200000e+00   1.3690000e+00   3.7568000e+00
   1.7500000e-01   9.4000000e-02   2.5000000e-02   3.1000000e-01   4.1700000e-01   5.6200000e-01   7.6100000e-01   1.0240000e+00   1.3240000e+00   3.7592000e+00
   1.8000000e-01   1.0600000e-01   1.7000000e-02   3.3300000e-01   4.0900000e-01   5.1700000e-01   7.7300000e-01   1.0410000e+00   1.3290000e+00   3.7588000e+00
   1.8500000e-01   1.1600000e-01   2.7000000e-02   2.9300000e-01   4.1800000e-01   5.4100000e-01   7.1300000e-01   1.1520000e+00   1.3710000e+00   3.7584000e+00
   1.9000000e-01   1.0100000e-01   1.7000000e-02   2.8700000e-01   4.1900000e-01   5.4400000e-01   7.4200000e-01   1.0940000e+00   1.3390000e+00   3.7580000e+00
   1.9500000e-01   1.0900000e-01   1.6000000e-02   2.9000000e-01   4.6400000e-01   5.4200000e-01   7.6900000e-01   1.0630000e+00   1.3320000e+00   3.7596000e+00
   2.0000000e-01   1.2400000e-01   2.3000000e-02   3.1800000e-01   4.0600000e-01   5.6700000e-01   7.8700000e-01   1.0860000e+00   1.3430000e+00   3.7622000e+00
