# Supplementary material for: TASEP modelling provides a parsimonious explanation for the ability of a single uORF to derepress translation during the integrated stress response
Source: eLife journal article supplement (doi:10.7554/elife.32563), 2018-06-22
Supplement: supp [file elife-32563-supp-v1.zip › elife_poa_e32563_Figure_3_source_data_1.txt]

   0.0000000e+00   0.0000000e+00   0.0000000e+00   0.0000000e+00   0.0000000e+00   0.0000000e+00   0.0000000e+00
   5.0000000e-03   1.7375887e+02   1.9285714e+03   7.2857143e+02   4.2121212e+02   1.4218750e+02   1.4038462e+02
   1.0000000e-02   2.8156028e+02   2.4428571e+03   1.1742857e+03   6.6666667e+02   2.0104167e+02   2.1153846e+02
   1.5000000e-02   3.1702128e+02   2.0500000e+03   1.2342857e+03   7.2121212e+02   2.2291667e+02   2.1282051e+02
   2.0000000e-02   3.1276596e+02   1.1642857e+03   1.0485714e+03   7.2878788e+02   2.0781250e+02   2.1474359e+02
   2.5000000e-02   2.9148936e+02   6.0000000e+02   7.8857143e+02   5.8484848e+02   2.0156250e+02   2.2435897e+02
   3.0000000e-02   2.8368794e+02   1.7857143e+02   5.2571429e+02   5.6969697e+02   2.0520833e+02   2.0064103e+02
   3.5000000e-02   2.5390071e+02   1.1428571e+02   3.0857143e+02   5.4242424e+02   1.8802083e+02   1.7115385e+02
   4.0000000e-02   2.2127660e+02   1.0000000e+02   2.1428571e+02   3.9696970e+02   1.6666667e+02   1.5705128e+02
   4.5000000e-02   1.9148936e+02   8.5714286e+01   1.5142857e+02   3.8030303e+02   1.7187500e+02   1.5705128e+02
   5.0000000e-02   1.7801418e+02   7.8571429e+01   1.4571429e+02   3.0757576e+02   1.2239583e+02   1.3910256e+02
   5.5000000e-02   1.5319149e+02   9.2857143e+01   9.7142857e+01   2.1818182e+02   1.2916667e+02   1.3461538e+02
   6.0000000e-02   1.6241135e+02   4.2857143e+01   9.7142857e+01   1.6818182e+02   1.3958333e+02   1.3910256e+02
   6.5000000e-02   1.4113475e+02   5.7142857e+01   1.0571429e+02   1.7272727e+02   1.1979167e+02   1.2179487e+02
   7.0000000e-02   1.2340426e+02   1.2857143e+02   8.5714286e+01   1.5757576e+02   1.1875000e+02   1.0641026e+02
   7.5000000e-02   1.1914894e+02   1.2142857e+02   4.5714286e+01   1.6969697e+02   1.0260417e+02   1.1410256e+02
   8.0000000e-02   1.0070922e+02   1.1428571e+02   5.7142857e+01   1.4242424e+02   1.0468750e+02   1.0384615e+02
   8.5000000e-02   9.8581560e+01   1.2142857e+02   7.7142857e+01   1.4242424e+02   8.7500000e+01   1.0641026e+02
   9.0000000e-02   8.9361702e+01   7.1428571e+01   8.5714286e+01   1.2727273e+02   8.5937500e+01   1.1153846e+02
   9.5000000e-02   9.7872340e+01   5.0000000e+01   8.2857143e+01   1.2272727e+02   9.7916667e+01   8.4615385e+01
   1.0000000e-01   1.0000000e+02   1.0000000e+02   1.0000000e+02   1.0000000e+02   1.0000000e+02   1.0000000e+02
