# Supplementary material for: TASEP modelling provides a parsimonious explanation for the ability of a single uORF to derepress translation during the integrated stress response
Source: eLife journal article supplement (doi:10.7554/elife.32563), 2018-06-22
Supplement: supp [file elife-32563-supp-v1.zip › elife_poa_e32563_Figure_3_source_data_2.txt]

   0.0000000e+00   0.0000000e+00   0.0000000e+00   0.0000000e+00   0.0000000e+00   0.0000000e+00   0.0000000e+00
   5.0000000e-03   2.4500000e-01   2.7000000e-01   2.5500000e-01   2.7800000e-01   2.7300000e-01   2.1900000e-01
   1.0000000e-02   3.9700000e-01   3.4200000e-01   4.1100000e-01   4.4000000e-01   3.8600000e-01   3.3000000e-01
   1.5000000e-02   4.4700000e-01   2.8700000e-01   4.3200000e-01   4.7600000e-01   4.2800000e-01   3.3200000e-01
   2.0000000e-02   4.4100000e-01   1.6300000e-01   3.6700000e-01   4.8100000e-01   3.9900000e-01   3.3500000e-01
   2.5000000e-02   4.1100000e-01   8.4000000e-02   2.7600000e-01   3.8600000e-01   3.8700000e-01   3.5000000e-01
   3.0000000e-02   4.0000000e-01   2.5000000e-02   1.8400000e-01   3.7600000e-01   3.9400000e-01   3.1300000e-01
   3.5000000e-02   3.5800000e-01   1.6000000e-02   1.0800000e-01   3.5800000e-01   3.6100000e-01   2.6700000e-01
   4.0000000e-02   3.1200000e-01   1.4000000e-02   7.5000000e-02   2.6200000e-01   3.2000000e-01   2.4500000e-01
   4.5000000e-02   2.7000000e-01   1.2000000e-02   5.3000000e-02   2.5100000e-01   3.3000000e-01   2.4500000e-01
   5.0000000e-02   2.5100000e-01   1.1000000e-02   5.1000000e-02   2.0300000e-01   2.3500000e-01   2.1700000e-01
   5.5000000e-02   2.1600000e-01   1.3000000e-02   3.4000000e-02   1.4400000e-01   2.4800000e-01   2.1000000e-01
   6.0000000e-02   2.2900000e-01   6.0000000e-03   3.4000000e-02   1.1100000e-01   2.6800000e-01   2.1700000e-01
   6.5000000e-02   1.9900000e-01   8.0000000e-03   3.7000000e-02   1.1400000e-01   2.3000000e-01   1.9000000e-01
   7.0000000e-02   1.7400000e-01   1.8000000e-02   3.0000000e-02   1.0400000e-01   2.2800000e-01   1.6600000e-01
   7.5000000e-02   1.6800000e-01   1.7000000e-02   1.6000000e-02   1.1200000e-01   1.9700000e-01   1.7800000e-01
   8.0000000e-02   1.4200000e-01   1.6000000e-02   2.0000000e-02   9.4000000e-02   2.0100000e-01   1.6200000e-01
   8.5000000e-02   1.3900000e-01   1.7000000e-02   2.7000000e-02   9.4000000e-02   1.6800000e-01   1.6600000e-01
   9.0000000e-02   1.2600000e-01   1.0000000e-02   3.0000000e-02   8.4000000e-02   1.6500000e-01   1.7400000e-01
   9.5000000e-02   1.3800000e-01   7.0000000e-03   2.9000000e-02   8.1000000e-02   1.8800000e-01   1.3200000e-01
   1.0000000e-01   1.4100000e-01   1.4000000e-02   3.5000000e-02   6.6000000e-02   1.9200000e-01   1.5600000e-01
