# Supplementary material for: TASEP modelling provides a parsimonious explanation for the ability of a single uORF to derepress translation during the integrated stress response
Source: eLife journal article supplement (doi:10.7554/elife.32563), 2018-06-22
Supplement: supp [file elife-32563-supp-v1.zip › elife_poa_e32563_Figure_4_source_data_1.txt]

   0.0000000e+00   0.0000000e+00   0.0000000e+00   0.0000000e+00   0.0000000e+00   0.0000000e+00
   5.0000000e-03   1.7375887e+02   2.6000000e+02   1.3673469e+02   1.0074231e+02   5.4968509e+01
   1.0000000e-02   2.8156028e+02   4.3111111e+02   2.2551020e+02   1.4782609e+02   8.9573128e+01
   1.5000000e-02   3.1702128e+02   4.8888889e+02   2.6700680e+02   1.6712619e+02   1.1102169e+02
   2.0000000e-02   3.1276596e+02   4.4888889e+02   2.6122449e+02   1.8706257e+02   1.1721484e+02
   2.5000000e-02   2.9148936e+02   4.4222222e+02   2.4693878e+02   1.7900318e+02   1.2421274e+02
   3.0000000e-02   2.8368794e+02   3.8444444e+02   2.3265306e+02   1.8250265e+02   1.2155353e+02
   3.5000000e-02   2.5390071e+02   3.2444444e+02   2.2891156e+02   1.6871686e+02   1.2662701e+02
   4.0000000e-02   2.2127660e+02   2.7111111e+02   1.9761905e+02   1.5546129e+02   1.2613716e+02
   4.5000000e-02   1.9148936e+02   2.7777778e+02   1.8571429e+02   1.5577943e+02   1.1875437e+02
   5.0000000e-02   1.7801418e+02   2.3111111e+02   1.5918367e+02   1.4029692e+02   1.1759972e+02
   5.5000000e-02   1.5319149e+02   1.7777778e+02   1.7755102e+02   1.3616119e+02   1.1672498e+02
   6.0000000e-02   1.6241135e+02   2.0222222e+02   1.4081633e+02   1.3414634e+02   1.1441568e+02
   6.5000000e-02   1.4113475e+02   1.1333333e+02   1.3945578e+02   1.2184517e+02   1.1130161e+02
   7.0000000e-02   1.2340426e+02   1.5111111e+02   1.3877551e+02   1.1813362e+02   1.1518544e+02
   7.5000000e-02   1.1914894e+02   1.2222222e+02   1.1360544e+02   1.1081654e+02   1.0626312e+02
   8.0000000e-02   1.0070922e+02   1.4000000e+02   1.1020408e+02   1.2587487e+02   1.0783765e+02
   8.5000000e-02   9.8581560e+01   1.1111111e+02   1.0272109e+02   1.0795334e+02   1.0528341e+02
   9.0000000e-02   8.9361702e+01   1.0222222e+02   8.5034014e+01   1.0678685e+02   1.0360392e+02
   9.5000000e-02   9.7872340e+01   1.0000000e+02   9.9659864e+01   1.0922587e+02   1.0493352e+02
   1.0000000e-01   1.0000000e+02   1.0000000e+02   1.0000000e+02   1.0000000e+02   1.0000000e+02
