# Supplementary material for: TASEP modelling provides a parsimonious explanation for the ability of a single uORF to derepress translation during the integrated stress response
Source: eLife journal article supplement (doi:10.7554/elife.32563), 2018-06-22
Supplement: supp [file elife-32563-supp-v1.zip › elife_poa_e32563_Figure_4_source_data_2.txt]

   0.0000000e+00   0.0000000e+00   0.0000000e+00   0.0000000e+00   0.0000000e+00   0.0000000e+00
   5.0000000e-03   2.4500000e-01   1.1700000e-01   4.0200000e-01   9.5000000e-01   1.5710000e+00
   1.0000000e-02   3.9700000e-01   1.9400000e-01   6.6300000e-01   1.3940000e+00   2.5600000e+00
   1.5000000e-02   4.4700000e-01   2.2000000e-01   7.8500000e-01   1.5760000e+00   3.1730000e+00
   2.0000000e-02   4.4100000e-01   2.0200000e-01   7.6800000e-01   1.7640000e+00   3.3500000e+00
   2.5000000e-02   4.1100000e-01   1.9900000e-01   7.2600000e-01   1.6880000e+00   3.5500000e+00
   3.0000000e-02   4.0000000e-01   1.7300000e-01   6.8400000e-01   1.7210000e+00   3.4740000e+00
   3.5000000e-02   3.5800000e-01   1.4600000e-01   6.7300000e-01   1.5910000e+00   3.6190000e+00
   4.0000000e-02   3.1200000e-01   1.2200000e-01   5.8100000e-01   1.4660000e+00   3.6050000e+00
   4.5000000e-02   2.7000000e-01   1.2500000e-01   5.4600000e-01   1.4690000e+00   3.3940000e+00
   5.0000000e-02   2.5100000e-01   1.0400000e-01   4.6800000e-01   1.3230000e+00   3.3610000e+00
   5.5000000e-02   2.1600000e-01   8.0000000e-02   5.2200000e-01   1.2840000e+00   3.3360000e+00
   6.0000000e-02   2.2900000e-01   9.1000000e-02   4.1400000e-01   1.2650000e+00   3.2700000e+00
   6.5000000e-02   1.9900000e-01   5.1000000e-02   4.1000000e-01   1.1490000e+00   3.1810000e+00
   7.0000000e-02   1.7400000e-01   6.8000000e-02   4.0800000e-01   1.1140000e+00   3.2920000e+00
   7.5000000e-02   1.6800000e-01   5.5000000e-02   3.3400000e-01   1.0450000e+00   3.0370000e+00
   8.0000000e-02   1.4200000e-01   6.3000000e-02   3.2400000e-01   1.1870000e+00   3.0820000e+00
   8.5000000e-02   1.3900000e-01   5.0000000e-02   3.0200000e-01   1.0180000e+00   3.0090000e+00
   9.0000000e-02   1.2600000e-01   4.6000000e-02   2.5000000e-01   1.0070000e+00   2.9610000e+00
   9.5000000e-02   1.3800000e-01   4.5000000e-02   2.9300000e-01   1.0300000e+00   2.9990000e+00
   1.0000000e-01   1.4100000e-01   4.5000000e-02   2.9400000e-01   9.4300000e-01   2.8580000e+00
