# Supplementary material for: TASEP modelling provides a parsimonious explanation for the ability of a single uORF to derepress translation during the integrated stress response
Source: eLife journal article supplement (doi:10.7554/elife.32563), 2018-06-22
Supplement: supp [file elife-32563-supp-v1.zip › elife_poa_e32563_Figure_4_source_data_3.txt]

   0.0000000e+00   0.0000000e+00   0.0000000e+00   0.0000000e+00   0.0000000e+00
   5.0000000e-03   1.7375887e+02   1.6556291e+02   1.1534884e+02   7.7507599e+01
   1.0000000e-02   2.8156028e+02   2.7086093e+02   1.9116279e+02   1.2188450e+02
   1.5000000e-02   3.1702128e+02   3.0529801e+02   2.3162791e+02   1.3495441e+02
   2.0000000e-02   3.1276596e+02   2.9205298e+02   2.3534884e+02   1.5592705e+02
   2.5000000e-02   2.9148936e+02   2.9403974e+02   2.0744186e+02   1.3525836e+02
   3.0000000e-02   2.8368794e+02   2.7152318e+02   1.9534884e+02   1.2978723e+02
   3.5000000e-02   2.5390071e+02   2.5629139e+02   1.7813953e+02   1.1489362e+02
   4.0000000e-02   2.2127660e+02   2.4238411e+02   1.4930233e+02   1.1489362e+02
   4.5000000e-02   1.9148936e+02   1.7880795e+02   1.4930233e+02   9.3920973e+01
   5.0000000e-02   1.7801418e+02   1.8410596e+02   1.3302326e+02   1.1550152e+02
   5.5000000e-02   1.5319149e+02   1.3576159e+02   1.1953488e+02   1.0364742e+02
   6.0000000e-02   1.6241135e+02   1.4569536e+02   1.1441860e+02   1.0182371e+02
   6.5000000e-02   1.4113475e+02   1.3907285e+02   1.1581395e+02   9.5136778e+01
   7.0000000e-02   1.2340426e+02   1.4304636e+02   1.0093023e+02   1.0091185e+02
   7.5000000e-02   1.1914894e+02   1.3112583e+02   1.0232558e+02   1.0638298e+02
   8.0000000e-02   1.0070922e+02   1.0198675e+02   9.3023256e+01   1.0151976e+02
   8.5000000e-02   9.8581560e+01   1.0728477e+02   1.0604651e+02   9.0273556e+01
   9.0000000e-02   8.9361702e+01   9.9337748e+01   1.1441860e+02   9.0881459e+01
   9.5000000e-02   9.7872340e+01   1.0198675e+02   1.0418605e+02   9.7264438e+01
   1.0000000e-01   1.0000000e+02   1.0000000e+02   1.0000000e+02   1.0000000e+02
