# Supplementary material for: TASEP modelling provides a parsimonious explanation for the ability of a single uORF to derepress translation during the integrated stress response
Source: eLife journal article supplement (doi:10.7554/elife.32563), 2018-06-22
Supplement: supp [file elife-32563-supp-v1.zip › elife_poa_e32563_Figure_4_source_data_4.txt]

   0.0000000e+00   0.0000000e+00   0.0000000e+00   0.0000000e+00   0.0000000e+00
   5.0000000e-03   2.4500000e-01   2.5000000e-01   2.4800000e-01   2.5500000e-01
   1.0000000e-02   3.9700000e-01   4.0900000e-01   4.1100000e-01   4.0100000e-01
   1.5000000e-02   4.4700000e-01   4.6100000e-01   4.9800000e-01   4.4400000e-01
   2.0000000e-02   4.4100000e-01   4.4100000e-01   5.0600000e-01   5.1300000e-01
   2.5000000e-02   4.1100000e-01   4.4400000e-01   4.4600000e-01   4.4500000e-01
   3.0000000e-02   4.0000000e-01   4.1000000e-01   4.2000000e-01   4.2700000e-01
   3.5000000e-02   3.5800000e-01   3.8700000e-01   3.8300000e-01   3.7800000e-01
   4.0000000e-02   3.1200000e-01   3.6600000e-01   3.2100000e-01   3.7800000e-01
   4.5000000e-02   2.7000000e-01   2.7000000e-01   3.2100000e-01   3.0900000e-01
   5.0000000e-02   2.5100000e-01   2.7800000e-01   2.8600000e-01   3.8000000e-01
   5.5000000e-02   2.1600000e-01   2.0500000e-01   2.5700000e-01   3.4100000e-01
   6.0000000e-02   2.2900000e-01   2.2000000e-01   2.4600000e-01   3.3500000e-01
   6.5000000e-02   1.9900000e-01   2.1000000e-01   2.4900000e-01   3.1300000e-01
   7.0000000e-02   1.7400000e-01   2.1600000e-01   2.1700000e-01   3.3200000e-01
   7.5000000e-02   1.6800000e-01   1.9800000e-01   2.2000000e-01   3.5000000e-01
   8.0000000e-02   1.4200000e-01   1.5400000e-01   2.0000000e-01   3.3400000e-01
   8.5000000e-02   1.3900000e-01   1.6200000e-01   2.2800000e-01   2.9700000e-01
   9.0000000e-02   1.2600000e-01   1.5000000e-01   2.4600000e-01   2.9900000e-01
   9.5000000e-02   1.3800000e-01   1.5400000e-01   2.2400000e-01   3.2000000e-01
   1.0000000e-01   1.4100000e-01   1.5100000e-01   2.1500000e-01   3.2900000e-01
