# Supplementary material for: TASEP modelling provides a parsimonious explanation for the ability of a single uORF to derepress translation during the integrated stress response
Source: eLife journal article supplement (doi:10.7554/elife.32563), 2018-06-22
Supplement: supp [file elife-32563-supp-v1.zip › elife_poa_e32563_Figure_5_source_data_1.txt]

   0.0000000e+00   0.0000000e+00   0.0000000e+00   0.0000000e+00   0.0000000e+00   0.0000000e+00
   5.0000000e-03   1.7375887e+02   1.1576763e+02   7.2819473e+01   5.9001513e+01   5.3736655e+01
   1.0000000e-02   2.8156028e+02   1.8464730e+02   1.1561866e+02   1.0332829e+02   8.7425860e+01
   1.5000000e-02   3.1702128e+02   2.1286307e+02   1.3103448e+02   1.1739788e+02   1.0711744e+02
   2.0000000e-02   3.1276596e+02   2.3029046e+02   1.3691684e+02   1.2602118e+02   1.1470937e+02
   2.5000000e-02   2.9148936e+02   2.2821577e+02   1.4705882e+02   1.2995461e+02   1.2265718e+02
   3.0000000e-02   2.8368794e+02   2.0705394e+02   1.4016227e+02   1.2753404e+02   1.2360617e+02
   3.5000000e-02   2.5390071e+02   2.0082988e+02   1.3935091e+02   1.3494705e+02   1.1542112e+02
   4.0000000e-02   2.2127660e+02   1.8298755e+02   1.2961460e+02   1.2617247e+02   1.1862396e+02
   4.5000000e-02   1.9148936e+02   1.6970954e+02   1.3326572e+02   1.1785174e+02   1.1874259e+02
   5.0000000e-02   1.7801418e+02   1.7053942e+02   1.1338742e+02   1.1376702e+02   1.1435350e+02
   5.5000000e-02   1.5319149e+02   1.4647303e+02   1.1724138e+02   1.1664145e+02   1.1209964e+02
   6.0000000e-02   1.6241135e+02   1.4439834e+02   1.1643002e+02   1.1996974e+02   1.0272835e+02
   6.5000000e-02   1.4113475e+02   1.3568465e+02   1.0527383e+02   1.0968230e+02   1.0640569e+02
   7.0000000e-02   1.2340426e+02   1.1742739e+02   1.0385396e+02   1.1255673e+02   1.0854093e+02
   7.5000000e-02   1.1914894e+02   1.1991701e+02   9.8174442e+01   1.0196672e+02   1.0593120e+02
   8.0000000e-02   1.0070922e+02   1.2033195e+02   1.0202840e+02   9.8940998e+01   1.0344009e+02
   8.5000000e-02   9.8581560e+01   1.1991701e+02   9.7160243e+01   1.0332829e+02   9.9525504e+01
   9.0000000e-02   8.9361702e+01   1.0954357e+02   9.4320487e+01   1.0272315e+02   1.0308422e+02
   9.5000000e-02   9.7872340e+01   1.0954357e+02   9.9188641e+01   9.7276853e+01   1.0391459e+02
   1.0000000e-01   1.0000000e+02   1.0000000e+02   1.0000000e+02   1.0000000e+02   1.0000000e+02
