# Supplementary material for: TASEP modelling provides a parsimonious explanation for the ability of a single uORF to derepress translation during the integrated stress response
Source: eLife journal article supplement (doi:10.7554/elife.32563), 2018-06-22
Supplement: supp [file elife-32563-supp-v1.zip › elife_poa_e32563_Figure_5_source_data_2.txt]

   0.0000000e+00   0.0000000e+00   0.0000000e+00   0.0000000e+00   0.0000000e+00   0.0000000e+00
   5.0000000e-03   2.4500000e-01   2.7900000e-01   3.5900000e-01   3.9000000e-01   4.5300000e-01
   1.0000000e-02   3.9700000e-01   4.4500000e-01   5.7000000e-01   6.8300000e-01   7.3700000e-01
   1.5000000e-02   4.4700000e-01   5.1300000e-01   6.4600000e-01   7.7600000e-01   9.0300000e-01
   2.0000000e-02   4.4100000e-01   5.5500000e-01   6.7500000e-01   8.3300000e-01   9.6700000e-01
   2.5000000e-02   4.1100000e-01   5.5000000e-01   7.2500000e-01   8.5900000e-01   1.0340000e+00
   3.0000000e-02   4.0000000e-01   4.9900000e-01   6.9100000e-01   8.4300000e-01   1.0420000e+00
   3.5000000e-02   3.5800000e-01   4.8400000e-01   6.8700000e-01   8.9200000e-01   9.7300000e-01
   4.0000000e-02   3.1200000e-01   4.4100000e-01   6.3900000e-01   8.3400000e-01   1.0000000e+00
   4.5000000e-02   2.7000000e-01   4.0900000e-01   6.5700000e-01   7.7900000e-01   1.0010000e+00
   5.0000000e-02   2.5100000e-01   4.1100000e-01   5.5900000e-01   7.5200000e-01   9.6400000e-01
   5.5000000e-02   2.1600000e-01   3.5300000e-01   5.7800000e-01   7.7100000e-01   9.4500000e-01
   6.0000000e-02   2.2900000e-01   3.4800000e-01   5.7400000e-01   7.9300000e-01   8.6600000e-01
   6.5000000e-02   1.9900000e-01   3.2700000e-01   5.1900000e-01   7.2500000e-01   8.9700000e-01
   7.0000000e-02   1.7400000e-01   2.8300000e-01   5.1200000e-01   7.4400000e-01   9.1500000e-01
   7.5000000e-02   1.6800000e-01   2.8900000e-01   4.8400000e-01   6.7400000e-01   8.9300000e-01
   8.0000000e-02   1.4200000e-01   2.9000000e-01   5.0300000e-01   6.5400000e-01   8.7200000e-01
   8.5000000e-02   1.3900000e-01   2.8900000e-01   4.7900000e-01   6.8300000e-01   8.3900000e-01
   9.0000000e-02   1.2600000e-01   2.6400000e-01   4.6500000e-01   6.7900000e-01   8.6900000e-01
   9.5000000e-02   1.3800000e-01   2.6400000e-01   4.8900000e-01   6.4300000e-01   8.7600000e-01
   1.0000000e-01   1.4100000e-01   2.4100000e-01   4.9300000e-01   6.6100000e-01   8.4300000e-01
