# Supplementary material for: TASEP modelling provides a parsimonious explanation for the ability of a single uORF to derepress translation during the integrated stress response
Source: eLife journal article supplement (doi:10.7554/elife.32563), 2018-06-22
Supplement: supp [file elife-32563-supp-v1.zip › elife_poa_e32563_Figure_6_source_data_1.txt]

   0.0000000e+00   0.0000000e+00   0.0000000e+00   0.0000000e+00   0.0000000e+00   0.0000000e+00
   5.0000000e-03   2.4500000e-01   2.0100000e-01   1.7700000e-01   1.0600000e-01   7.3000000e-02
   1.0000000e-02   3.9700000e-01   3.5400000e-01   2.0900000e-01   1.5000000e-01   1.2900000e-01
   1.5000000e-02   4.4700000e-01   3.6900000e-01   2.7100000e-01   1.9200000e-01   1.3400000e-01
   2.0000000e-02   4.4100000e-01   3.8300000e-01   3.1200000e-01   2.1000000e-01   1.4300000e-01
   2.5000000e-02   4.1100000e-01   3.7600000e-01   2.7400000e-01   2.1200000e-01   1.6500000e-01
   3.0000000e-02   4.0000000e-01   3.6800000e-01   2.9200000e-01   2.1600000e-01   1.6800000e-01
   3.5000000e-02   3.5800000e-01   3.3400000e-01   2.5800000e-01   2.1000000e-01   1.4900000e-01
   4.0000000e-02   3.1200000e-01   3.4700000e-01   2.5400000e-01   2.0200000e-01   1.4700000e-01
   4.5000000e-02   2.7000000e-01   2.9200000e-01   2.2400000e-01   2.1000000e-01   1.4500000e-01
   5.0000000e-02   2.5100000e-01   2.5200000e-01   2.0500000e-01   2.0300000e-01   1.4700000e-01
   5.5000000e-02   2.1600000e-01   2.4900000e-01   2.1000000e-01   2.2100000e-01   1.4200000e-01
   6.0000000e-02   2.2900000e-01   2.3600000e-01   2.1800000e-01   2.0100000e-01   1.6700000e-01
   6.5000000e-02   1.9900000e-01   2.1700000e-01   2.2400000e-01   1.8400000e-01   1.5000000e-01
   7.0000000e-02   1.7400000e-01   1.9500000e-01   1.9500000e-01   1.7000000e-01   1.4100000e-01
   7.5000000e-02   1.6800000e-01   1.7900000e-01   1.7800000e-01   1.8800000e-01   1.4500000e-01
   8.0000000e-02   1.4200000e-01   1.6100000e-01   1.6600000e-01   1.6400000e-01   1.6700000e-01
   8.5000000e-02   1.3900000e-01   1.7600000e-01   1.9200000e-01   1.7600000e-01   1.3100000e-01
   9.0000000e-02   1.2600000e-01   1.4300000e-01   1.8600000e-01   1.5700000e-01   1.3400000e-01
   9.5000000e-02   1.3800000e-01   1.7000000e-01   1.8000000e-01   1.5200000e-01   1.3100000e-01
   1.0000000e-01   1.4100000e-01   1.6600000e-01   1.6500000e-01   1.5900000e-01   1.3800000e-01
