# Supplementary material for: TASEP modelling provides a parsimonious explanation for the ability of a single uORF to derepress translation during the integrated stress response
Source: eLife journal article supplement (doi:10.7554/elife.32563), 2018-06-22
Supplement: supp [file elife-32563-supp-v1.zip › elife_poa_e32563_Figure_6_source_data_1.txt]

   0.0000000e+00   0.0000000e+00   0.0000000e+00   0.0000000e+00   0.0000000e+00   0.0000000e+00
   5.0000000e-03   2.5000000e-01   2.6200000e-01   2.4500000e-01   2.5000000e-01   2.7300000e-01
   1.0000000e-02   4.1100000e-01   3.9500000e-01   3.9700000e-01   3.4800000e-01   4.1500000e-01
   1.5000000e-02   4.1200000e-01   4.0300000e-01   4.4700000e-01   4.5400000e-01   4.8300000e-01
   2.0000000e-02   3.9600000e-01   4.2300000e-01   4.4100000e-01   4.7300000e-01   5.0700000e-01
   2.5000000e-02   2.5000000e-01   3.5700000e-01   4.1100000e-01   5.1900000e-01   5.0200000e-01
   3.0000000e-02   1.7300000e-01   3.1900000e-01   4.0000000e-01   4.9700000e-01   4.9700000e-01
   3.5000000e-02   7.6000000e-02   2.4300000e-01   3.5800000e-01   4.3200000e-01   5.0700000e-01
   4.0000000e-02   2.8000000e-02   1.9800000e-01   3.1200000e-01   4.3800000e-01   4.8000000e-01
   4.5000000e-02   1.9000000e-02   1.4200000e-01   2.7000000e-01   4.2100000e-01   5.1900000e-01
   5.0000000e-02   1.5000000e-02   7.6000000e-02   2.5100000e-01   4.2200000e-01   4.3700000e-01
   5.5000000e-02   1.5000000e-02   7.2000000e-02   2.1600000e-01   3.9200000e-01   4.4100000e-01
   6.0000000e-02   9.0000000e-03   4.7000000e-02   2.2900000e-01   3.7400000e-01   4.6100000e-01
   6.5000000e-02   8.0000000e-03   4.6000000e-02   1.9900000e-01   3.5600000e-01   4.7900000e-01
   7.0000000e-02   1.4000000e-02   3.6000000e-02   1.7400000e-01   3.3400000e-01   4.6000000e-01
   7.5000000e-02   1.4000000e-02   3.5000000e-02   1.6800000e-01   3.2800000e-01   4.5600000e-01
   8.0000000e-02   1.1000000e-02   3.9000000e-02   1.4200000e-01   2.8800000e-01   4.4100000e-01
   8.5000000e-02   1.0000000e-02   4.4000000e-02   1.3900000e-01   2.9300000e-01   4.5300000e-01
   9.0000000e-02   6.0000000e-03   3.6000000e-02   1.2600000e-01   3.3700000e-01   4.5100000e-01
   9.5000000e-02   6.0000000e-03   4.4000000e-02   1.3800000e-01   3.1100000e-01   3.8600000e-01
   1.0000000e-01   1.1000000e-02   2.7000000e-02   1.4100000e-01   3.3800000e-01   4.2000000e-01
