# Supplementary material for: TASEP modelling provides a parsimonious explanation for the ability of a single uORF to derepress translation during the integrated stress response
Source: eLife journal article supplement (doi:10.7554/elife.32563), 2018-06-22
Supplement: supp [file elife-32563-supp-v1.zip › elife_poa_e32563_Figure_6_source_data_2.txt]

   0.0000000e+00   0.0000000e+00   0.0000000e+00   0.0000000e+00   0.0000000e+00   0.0000000e+00
   5.0000000e-03   2.4500000e-01   2.6200000e-01   2.7900000e-01   2.6200000e-01   2.6000000e-01
   1.0000000e-02   3.9700000e-01   3.7600000e-01   4.1700000e-01   3.9400000e-01   4.0600000e-01
   1.5000000e-02   4.4700000e-01   4.7300000e-01   4.7500000e-01   4.8800000e-01   4.9900000e-01
   2.0000000e-02   4.4100000e-01   4.6500000e-01   5.0900000e-01   5.1800000e-01   5.7600000e-01
   2.5000000e-02   4.1100000e-01   4.5200000e-01   4.9900000e-01   5.5500000e-01   5.6100000e-01
   3.0000000e-02   4.0000000e-01   4.6500000e-01   4.5000000e-01   5.5100000e-01   5.6500000e-01
   3.5000000e-02   3.5800000e-01   3.6600000e-01   4.8300000e-01   5.4100000e-01   5.2800000e-01
   4.0000000e-02   3.1200000e-01   3.5700000e-01   4.3200000e-01   4.3900000e-01   5.3600000e-01
   4.5000000e-02   2.7000000e-01   3.5600000e-01   3.9900000e-01   4.1900000e-01   5.0700000e-01
   5.0000000e-02   2.5100000e-01   2.9900000e-01   3.7600000e-01   4.5700000e-01   5.2500000e-01
   5.5000000e-02   2.1600000e-01   2.8700000e-01   3.7700000e-01   3.8900000e-01   4.4000000e-01
   6.0000000e-02   2.2900000e-01   2.6600000e-01   3.4500000e-01   3.5400000e-01   4.0800000e-01
   6.5000000e-02   1.9900000e-01   2.5300000e-01   3.0000000e-01   3.6800000e-01   4.3700000e-01
   7.0000000e-02   1.7400000e-01   2.3800000e-01   2.7600000e-01   3.6500000e-01   4.7500000e-01
   7.5000000e-02   1.6800000e-01   1.9000000e-01   2.6900000e-01   3.5300000e-01   4.3800000e-01
   8.0000000e-02   1.4200000e-01   1.7700000e-01   2.8700000e-01   3.6500000e-01   3.7900000e-01
   8.5000000e-02   1.3900000e-01   2.1000000e-01   2.7900000e-01   3.4100000e-01   4.0600000e-01
   9.0000000e-02   1.2600000e-01   2.0400000e-01   2.7700000e-01   3.6200000e-01   4.1400000e-01
   9.5000000e-02   1.3800000e-01   1.6900000e-01   2.9200000e-01   3.6000000e-01   3.8400000e-01
   1.0000000e-01   1.4100000e-01   1.9900000e-01   2.6300000e-01   3.4300000e-01   4.1100000e-01
