# Supplementary material for: TASEP modelling provides a parsimonious explanation for the ability of a single uORF to derepress translation during the integrated stress response
Source: eLife journal article supplement (doi:10.7554/elife.32563), 2018-06-22
Supplement: supp [file elife-32563-supp-v1.zip › elife_poa_e32563_Figure_6_source_data_3.txt]

   0.0000000e+00   0.0000000e+00   0.0000000e+00   0.0000000e+00
   5.0000000e-03   3.0400000e-01   2.1500000e-01   4.3000000e-02
   1.0000000e-02   4.6600000e-01   4.4100000e-01   9.3000000e-02
   1.5000000e-02   6.9000000e-01   5.5300000e-01   1.0000000e-01
   2.0000000e-02   8.4100000e-01   7.1200000e-01   1.2500000e-01
   2.5000000e-02   9.2900000e-01   7.5900000e-01   1.4400000e-01
   3.0000000e-02   1.0030000e+00   8.2400000e-01   1.1300000e-01
   3.5000000e-02   1.1230000e+00   9.5500000e-01   1.4500000e-01
   4.0000000e-02   1.1620000e+00   8.7600000e-01   1.5000000e-01
   4.5000000e-02   1.1430000e+00   9.9600000e-01   1.8400000e-01
   5.0000000e-02   1.2050000e+00   9.9100000e-01   1.6100000e-01
   5.5000000e-02   1.2920000e+00   1.0560000e+00   1.7600000e-01
   6.0000000e-02   1.3030000e+00   1.0200000e+00   2.0300000e-01
   6.5000000e-02   1.2400000e+00   1.0470000e+00   1.9200000e-01
   7.0000000e-02   1.2690000e+00   1.0420000e+00   1.7700000e-01
   7.5000000e-02   1.2360000e+00   1.0700000e+00   1.9300000e-01
   8.0000000e-02   1.3510000e+00   1.0780000e+00   2.0800000e-01
   8.5000000e-02   1.3100000e+00   1.1140000e+00   1.9700000e-01
   9.0000000e-02   1.3350000e+00   1.0910000e+00   1.7000000e-01
   9.5000000e-02   1.3480000e+00   1.1320000e+00   2.0600000e-01
   1.0000000e-01   1.2920000e+00   1.1060000e+00   1.9800000e-01
