# Supplementary material for: TASEP modelling provides a parsimonious explanation for the ability of a single uORF to derepress translation during the integrated stress response
Source: eLife journal article supplement (doi:10.7554/elife.32563), 2018-06-22
Supplement: supp [file elife-32563-supp-v1.zip › elife_poa_e32563_Figure_7_source_data_1.csv]

Study	Tran	uorf_control_ribo	uorf_treat_ribo	uorf_control_rna	uorf_treat_rna	uorf_control_te	uorf_treat_te	uorf_len	control_ribo_count	control_rna_count	treat_ribo_count	treat_rna_count	control_te	treat_te	riboseq_fold_change	rnaseq_fold_change	te_fold_change	cds_te_z_score	Pause_score
Andreev	ENST00000214869	3.00001	1.00001	10.0074628209	8.5432837164	0.1170521819	0.2997772816	18	227.00001	379.727617037	130.00001	324.170154351	0.5977969466	0.4010239939	0.5726872435	0.8536912771	0.6708364708	0.902336677	3.3105022579
Andreev	ENST00000370128	2.00001	2.00001	12.0852071716	11.8934911953	0.1681600438	0.165492405	18	611.00001	738.540438264	279.00001	726.824461933	0.8273074545	0.3838616126	0.4566284868	0.9841363103	0.4639890653	-0.0361775664	2.5848849804
Andreev	ENST00000396354	4.00001	2.00001	4.828314244	3.8391804347	0.5209471225	0.8284485636	18	283.00001	270.117357985	90.00001	214.780816538	1.0476927959	0.4190318831	0.3180212255	0.7951388913	0.3999568239	-0.7027494401	26.4961912242
Andreev	ENST00000396475	2.00001	0.00001	11.8659044439	11.4994803274	8.69604513878E-007	0.168550995	30	599.00001	641.549900265	182.00001	621.738569704	0.9336764136	0.2927275528	0.3038397445	0.9691195797	0.3135214177	-1.331894455	10.3829444056
Andreev	ENST00000245680	2.00001	11.00001	8.5859021464	8.0840889098	1.3606987903	0.2329411593	27	375.00001	499.572306371	92.00001	470.37421027	0.7506421097	0.1955889757	0.2453333535	0.9415538137	0.2605622216	-1.9139967465	7.2787878604
Andreev	ENST00000377843	37.00001	27.00001	25.103165381	22.3458383001	1.2082791273	1.4739181071	21	857.00001	1210.92888243	191.00001	1077.9206761	0.7077211738	0.1771930108	0.2228704875	0.8901601834	0.2503712159	-1.6686243907	6.3202016952
Andreev	ENST00000379170	1.00001	2.00001	9.409614374	8.4006580589	0.2380777775	0.1062753435	24	186.00001	423.040579563	60.00001	377.679585229	0.4396741565	0.1588648483	0.3225806816	0.8927738933	0.3613240531	-0.811848133	4.7844733725
Andreev	ENST00000378757	0.00001	1.00001	1.8482385366	1.99458	0.5013636956	5.41055702608E-006	18	90.00001	177.944299106	29.00001	192.03373	0.5057763045	0.1510151888	0.3222222975	1.0791788833	0.2985809883	-1.3944181163	2.7255448486
Andreev	ENST00000395074	0.00001	0.00001	1.9754503601	2.3649757283	4.22837320497E-006	5.06213681809E-006	51	7.00001	44.9318121113	5.00001	53.7916048009	0.155791847	0.0929514934	0.7142861224	1.1971830708	0.5966390102	0.1981808196	18.2456137441
Andreev	ENST00000296003	3.00001	0.00001	9.2285486127	8.5164395509	1.17419961008E-006	0.3250792867	24	360.00001	750.588620497	91.00001	692.670416808	0.4796235916	0.1313756265	0.2527777985	0.9228362886	0.273914021	-1.61806969	2.2025171499
Andreev	ENST00000245796	0.00001	0.00001	0.3585197764	0.4394758288	2.27543799769E-005	2.78924641207E-005	60	3.00001	18.9417948535	1.00001	23.2189729568	0.1583804504	0.0430686578	0.3333355555	1.2258063788	0.2719316536	-0.9489461315	7.3076866864
Andreev	ENST00000610322	4.00001	6.00001	21.0991305391	19.6695653217	0.3050402946	0.1895817457	24	661.00001	1225.50783215	270.00001	1142.4739191	0.5393682461	0.2363292549	0.4084720211	0.932245302	0.4381593773	-0.3292312649	4.1843847885
Andreev	ENST00000279146	3.00001	4.00001	29.1621624324	31.1621624324	0.1283611177	0.1028733725	33	1251.00001	876.632276757	584.00001	936.753488878	1.4270521896	0.6234297677	0.466826543	1.0685820198	0.4368654295	-0.2832318543	2.4285714166
Andreev	ENST00000376573	1.00001	0.00001	10.5497107575	10.2814309048	9.72627262937E-007	0.0947902765	30	200.00001	429.021570805	69.00001	418.111523461	0.4661770494	0.1650277644	0.3450000328	0.9745699329	0.3540023359	-0.9844977987	2.9048275461
Andreev	ENST00000248378	4.00001	14.00001	102.101072527	92.3430327106	0.1516087309	0.0391769636	36	417.00001	941.598779969	170.00001	851.607968331	0.442863796	0.1996223806	0.4076738751	0.9044276463	0.4507534426	-0.2363917433	6.1781794607
Andreev	ENST00000061240	0.00001	1.00001	0.2790697943	0.1985688998	5.0360857158	3.58333298878E-005	18	28.00001	47.1472913551	10.00001	33.5471124642	0.5938837459	0.2980885467	0.3571430867	0.7115384893	0.501930805	-0.1412677062	2.0059879999
Andreev	ENST00000300291	9.00001	9.00001	33.7391794883	33.6634355748	0.2673526883	0.2667524859	21	1419.00001	1097.32664717	550.00001	1094.86316655	1.2931427608	0.5023458883	0.3875969035	0.9977550161	0.3884690102	-0.5084941402	3.493274764
Andreev	ENST00000290219	4.00001	0.00001	23.1679424764	22.6384512562	4.41726330429E-007	0.172652794	24	98.00001	977.88023869	28.00001	955.531296772	0.1002167813	0.02930308	0.2857143586	0.9771455225	0.2923969378	-1.5836411582	3.8518738731
Andreev	ENST00000257897	0.00001	0.00001	0.4844098552	0.5066815702	1.97362615674E-005	2.06436757881E-005	30	6.00001	40.5289578879	5.00001	42.3923580364	0.1480425432	0.1179460222	0.8333336111	1.0459770062	0.7967035663	0.5908445409	2.999995
Andreev	ENST00000322776	36.00001	43.00001	45.0451128947	41.8984963534	1.026290052	0.7991990182	18	2686.00001	3488.49374307	1320.00001	3244.80577315	0.7699598187	0.406804013	0.4914370831	0.930145218	0.5283444709	0.2551197243	2.7382222858
Andreev	ENST00000324288	0.00001	0.00001	0.052459887	0.0572289634	0.0001747367	0.0001906218	57	0.00001	3.1218234538	0.00001	3.405625328	3.20325609309E-006	2.93631830779E-006	1	1.0909090083	0.9166667361	0.1420059085	0
Andreev	ENST00000279263	2.00001	2.00001	7.7770036237	7.1498259233	0.2797284887	0.25716974	24	178.00001	406.996522973	69.00001	374.174223322	0.4373501982	0.184406102	0.3876404838	0.9193548402	0.4216440344	-0.6051033003	7.3106059815
Andreev	ENST00000368885	71.00001	39.00001	39.1963351396	33.3141361867	1.1706745083	1.8113940946	21	403.00001	1873.9581181	170.00001	1592.73298721	0.2150528372	0.1067347831	0.4218362426	0.849929874	0.4963188794	0.1684207118	8.7977772196
Andreev	ENST00000309422	7.00001	8.00001	28.2434785652	23.1608698696	0.3454106018	0.247845179	42	29.00001	418.944932051	16.00001	343.552903065	0.069221532	0.0465721869	0.5517242925	0.8200431054	0.6727991357	1.189572044	3.4459798562
Andreev	ENST00000370179	10.00001	16.00001	43.9631338479	37.0990785484	0.4312778275	0.2274635388	18	505.00001	840.18433576	103.00001	709.004612258	0.6010585874	0.1452741043	0.2039604118	0.8438679253	0.2416970781	-1.9949068302	2.2496347075
Andreev	ENST00000288723	2.00001	0.00001	9.0696133591	7.6872929171	1.30084804987E-006	0.2205176694	18	52.00001	333.560224652	21.00001	282.721550619	0.1558939171	0.074278066	0.4038462685	0.847587721	0.4764654543	0.0064344972	8.6425779562
Andreev	ENST00000528838	8.00001	3.00001	73.2717090896	61.411765112	0.0488507372	0.1091827951	87	438.00001	1338.26144533	133.00001	1121.64706624	0.327290315	0.1185756322	0.3036529839	0.8381374732	0.3622949619	-0.765876303	12.9354632312
Andreev	ENST00000554659	1.00001	0.00001	7.5260699383	6.3509624818	1.57456448982E-006	0.1328728019	24	53.00001	218.883200706	10.00001	184.707158845	0.2421383177	0.0541398074	0.1886793984	0.8438617411	0.2235904167	-2.4900317928	6.8494623223
Andreev	ENST00000389879	10.00001	7.00001	20.6671397077	24.3660613876	0.2872852485	0.4838603765	33	675.00001	1090.97446578	226.00001	1286.23269507	0.6187129316	0.1757069392	0.3348148247	1.1789759847	0.2839878242	-1.8332058367	2.8018119982
Andreev	ENST00000333007	0.00001	0.00001	0.1875449749	0.2198803042	4.5479289456E-005	5.33205435549E-005	27	13.00001	13.6421603928	5.00001	15.9942562012	0.9529289809	0.3126128491	0.384615858	1.1724137337	0.328054719	-0.7204709669	3.068366129
Andreev	ENST00000397588	0.00001	1.00001	10.4340660989	8.9175825824	0.1121391353	9.58399142311E-007	36	286.00001	473.590666822	102.00001	404.759164991	0.6038970572	0.2520017305	0.3566433791	0.8546603498	0.4172925294	-0.6024976495	4.5099999248
Andreev	ENST00000252936	8.00001	5.00001	16.8154440772	14.721235583	0.3396460828	0.4757537156	24	1771.00001	1897.34260671	741.00001	1661.04608162	0.9334107629	0.4461044267	0.4184076826	0.8754592216	0.4779293795	-0.0055296902	3.4530950641
Andreev	ENST00000455036	9.00001	13.00001	7.2773910297	6.4551118065	2.0139093465	1.2367083153	24	699.00001	792.932397609	507.00001	703.338223919	0.8815379623	0.7208480824	0.7253218923	0.8870090641	0.8177164379	1.4364232255	3.0672726715
Andreev	ENST00000367619	2.00001	1.00001	5.359180714	5.251207049	0.1904343117	0.3731932373	18	1334.00001	491.853696638	624.00001	481.944113609	2.7121886429	1.2947559528	0.4677661209	0.97985258	0.4773841805	0.0130312822	6.3093922303
Andreev	ENST00000618527	13.00001	23.00001	31.4751301122	27.5910273813	0.8336046963	0.4130248216	45	1242.00001	2498.42588357	611.00001	2190.11444014	0.4971130095	0.27898086	0.4919484743	0.8765977228	0.5612020902	0.5518545994	8.9071274023
Andreev	ENST00000382456	14.00001	9.00001	51.4863702439	50.1004305022	0.1796393745	0.2719168186	18	2198.00001	3721.32042707	760.00001	3621.14778241	0.5906505642	0.2098782087	0.3457688838	0.9730814246	0.355333968	-0.8698738763	2.4198027019
Andreev	ENST00000295087	42.00001	25.00001	64.2132935993	68.7724374221	0.3635178705	0.6540703279	171	18.00001	202.403305556	6.00001	216.773940178	0.0889314033	0.0276786499	0.3333337037	1.0709999996	0.3112359513	-1.3979116178	17.9325842277
Andreev	ENST00000559228	2.00001	7.00001	5.0244642217	4.9465252739	1.4151368107	0.3980543819	48	67.00001	195.22137028	39.00001	192.193117412	0.343200183	0.2029209502	0.5820896146	0.9844881077	0.5912611946	0.5090900271	5.9695290308
Andreev	ENST00000361523	6.00001	7.00001	58.8636366477	50.9090911932	0.1375001957	0.1019306713	60	271.00001	1326.3939458	90.00001	1147.15152155	0.2043133647	0.0784552069	0.3321033457	0.8648648655	0.3839944932	-0.786869768	9.7766254292
Andreev	ENST00000373491	1.00001	2.00001	6.7677643848	6.6204506932	0.3020957474	0.1477607587	30	133.00001	342.223285722	24.00001	334.774123388	0.3886351851	0.0716901586	0.1804511894	0.9782330349	0.1844664645	-2.7866224156	2.8047944245
Andreev	ENST00000619426	5.00001	9.00001	41.4294957439	36.7024582277	0.2452154552	0.1206872039	21	1888.00001	1217.23804162	944.00001	1078.35317745	1.5510524199	0.8754089381	0.5000000026	0.8859016401	0.5643967457	0.6381276217	14.8419269574
Andreev	ENST00000302850	2.00001	2.00001	2.3486550159	1.6286804342	1.2279941221	0.851555459	33	262.00001	295.218818361	152.00001	204.720195187	0.8874773345	0.7424768712	0.5801526878	0.6934523901	0.8366150237	0.789898398	6.8161431921
Andreev	ENST00000255175	29.00001	16.00001	36.8134417439	35.2752030417	0.4535766947	0.7877560105	45	704.00001	1162.48668262	346.00001	1113.91252272	0.6055983441	0.3106168599	0.49147728	0.9582152977	0.5129090311	0.1754777094	5.251573128
Andreev	ENST00000396478	0.00001	0.00001	2.8756826984	2.6829425763	3.72725085075E-006	3.47743511678E-006	24	177.00001	210.164477205	108.00001	196.078386617	0.8421975605	0.5508001767	0.6101695136	0.9329758731	0.6540035291	0.5004956956	2.1056909999
Andreev	ENST00000356860	1.00001	0.00001	3.8976597263	4.0257834867	0.000002484	0.2565667786	51	195.00001	250.290894189	42.00001	258.518449392	0.7790935049	0.1624642655	0.2153846556	1.0328719718	0.2085298677	-2.2533800647	30.8384749394
Andreev	ENST00000307358	0.00001	0.00001	0.5454546163	0.5950413932	1.68055535549E-005	1.83333309524E-005	18	29.00001	41.2424295986	21.00001	44.9917408933	0.7031595927	0.4667525546	0.7241380262	1.0909090791	0.6637931978	0.3848688354	9.3726933811
Andreev	ENST00000225740	0.00001	0.00001	0.4721755143	0.2833053626	3.52976022392E-005	2.11785653776E-005	24	15.00001	26.7762864587	4.00001	16.0657749354	0.5601975473	0.2489770967	0.2666671556	0.6000001143	0.4444451746	-0.3117093125	25.6190458763
Andreev	ENST00000354831	0.00001	4.00001	34.5003851784	31.013607258	0.1289759674	2.89851836386E-007	27	2481.00001	4675.4410877	840.00001	4202.91810952	0.5306451228	0.1998611413	0.3385731587	0.8989351017	0.3766380443	-0.7997380138	2.8798751838
Andreev	ENST00000543227	0.00001	0.00001	0.8487935665	1.0042064512	9.95811168929E-006	1.17814276573E-005	54	8.00001	33.2758514877	6.00001	39.3686121696	0.2404148847	0.1524059313	0.7500003125	1.1830985658	0.6339288494	0.231383362	11.6327042562
Andreev	ENST00000399022	14.00001	26.00001	44.2807571451	40.8548896372	0.6363989777	0.3161646481	21	1171.00001	1977.87381915	362.00001	1824.85173713	0.5920499067	0.1983722856	0.3091374952	0.9226330413	0.3350600741	-0.8970558902	5.8173301654
Andreev	ENST00000357365	3.00001	1.00001	18.3958334375	17.3020834375	0.0577970857	0.1630809504	24	103.00001	1001.80642928	22.00001	942.242627201	0.1028142833	0.0233485616	0.2135923094	0.9405436017	0.2270945323	-2.6085561112	2.5864406604
Andreev	ENST00000233468	46.00001	47.00001	110.154545727	111.000000273	0.4234235125	0.4175952041	21	777.00001	1977.53636853	310.00001	1992.71429061	0.3929131329	0.1555667119	0.3989704067	1.0076751671	0.3959315658	-0.4585049492	1.9048727725
Andreev	ENST00000453396	1.00001	1.00001	7.1784650548	7.5373882851	0.1326732765	0.1393069399	45	23.00001	26.6400814257	14.00001	27.9720854138	0.8633610999	0.5004993297	0.6086958223	1.0499999969	0.5797103087	0.507005797	6.2085426356
Andreev	ENST00000349703	11.00001	8.00001	12.2136242457	12.2481992612	0.6531580545	0.9006343882	21	895.00001	2002.45277515	275.00001	2008.12143125	0.4469518688	0.1369439147	0.3072625776	1.0028308563	0.3063952167	-1.5942826425	3.0555336626
Andreev	ENST00000361114	10.00001	10.00001	26.4334873143	23.4762905036	0.4259620999	0.3783083889	27	1031.00001	1399.99580961	558.00001	1243.37390445	0.7364307828	0.4487789297	0.5412221189	0.8881268757	0.6093972986	0.9651601074	3.274670455
Andreev	ENST00000258796	1.00001	0.00001	19.8384298326	17.9126033864	5.58266142799E-007	0.0504077192	39	369.00001	799.132647874	93.00001	721.556408205	0.461750638	0.1288880661	0.2520325406	0.9029244521	0.2791291564	-1.9028253553	4.7559561985
Andreev	ENST00000396319	7.00001	7.00001	38.557054056	36.6286308195	0.1911076074	0.1815493992	33	1653.00001	2767.92912299	704.00001	2629.49170944	0.5971973763	0.2677323558	0.4258923205	0.9499852029	0.4483146887	-0.2497666551	5.0577900946
Andreev	ENST00000330288	0.00001	2.00001	5.7304688672	5.2265626172	0.3826625923	1.74505790569E-006	18	53.00001	79.9082047591	37.00001	72.8815120508	0.6632611777	0.5076734683	0.6981132645	0.9120654415	0.7654201472	1.3851614552	5.1082250345
Andreev	ENST00000377838	0.00001	1.00001	1.715031601	1.8383729106	0.543964717	5.83079635029E-006	27	179.00001	236.991959389	93.00001	254.03590109	0.7552999286	0.3660900274	0.5195530995	1.0719178058	0.4846949054	-0.1805132843	6.5994063324
Andreev	ENST00000602728	16.00001	10.00001	120.61298113	133.413461899	0.0749550297	0.1326557875	30	1459.00001	1238.29327293	609.00001	1369.71154216	1.1782346249	0.4446191707	0.4174091884	1.1061285498	0.3773604691	-0.5847138363	14.7501675356
Andreev	ENST00000486685	0.00001	0.00001	11.4702096135	11.9082128341	8.39756572987E-007	8.71823648995E-007	51	54.00001	191.395066296	19.00001	198.703708272	0.2821389864	0.0956198058	0.3518519719	1.0381861566	0.3389102905	-1.0655577194	11.136777777
Andreev	ENST00000344843	5.00001	10.00001	120.332871429	91.3730933426	0.1094415176	0.0415514891	30	1056.00001	1800.98197571	519.00001	1367.55063036	0.5863467954	0.3795106364	0.4914772775	0.7593361004	0.6472460315	0.7271790555	2.39367112
Andreev	ENST00000261318	1.00001	0.00001	4.6552832235	3.5333174929	2.83020136747E-006	0.2148118497	21	21.00001	136.776654708	13.00001	103.812233005	0.1535350462	0.125226186	0.6190478005	0.7589908762	0.8156195547	2.0542361864	4.3597560533
Andreev	ENST00000335181	21.00001	16.00001	201.715703335	194.312769771	0.0823415261	0.1041069667	33	10991.00001	9749.59232785	5095.00001	9391.78387228	1.1273291888	0.5424954491	0.4635610959	0.9633001624	0.4812218601	0.0540136855	4.3057304271
Andreev	ENST00000334133	0.00001	1.00001	3.1690143863	2.7766602616	0.3601484898	3.15555525503E-006	90	32.00001	61.126766385	9.00001	53.5586912676	0.5235024179	0.1680401404	0.2812502246	0.876190488	0.3209920999	-0.9142995707	5.620303193
Andreev	ENST00000310931	16.00001	27.00001	108.009188453	86.2970904441	0.3128727731	0.1481356376	42	6028.00001	9787.68979174	1998.00001	7820.16014834	0.6158756702	0.2554934902	0.3314532194	0.798979158	0.4148458894	-0.5104610552	3.3876701924
Andreev	ENST00000378526	3.00001	5.00001	5.6989286036	4.9050000321	1.0193700239	0.5264164914	27	1002.00001	639.335360749	484.00001	550.268336939	1.5672526056	0.8795708884	0.4830339373	0.8606881001	0.561218329	0.3615376483	5.9078590386
Andreev	ENST00000256367	1.00001	0.00001	4.2466937033	3.8039104945	2.62887363264E-006	0.2354796625	105	13.00001	27.0170608932	7.00001	24.2001162891	0.4811778028	0.2892552216	0.5384618935	0.8957346021	0.6011399942	0.4062960967	4.2334628703
Andreev	ENST00000221232	10.00001	2.00001	17.4656382223	17.068022514	0.1171787768	0.5725533687	21	1457.00001	1880.4670486	516.00001	1837.65709068	0.7748075198	0.2807923266	0.3541523723	0.9772344014	0.3624026864	-0.906303476	4.3951715096
Andreev	ENST00000403825	116.00001	109.00001	192.744105498	182.606987594	0.5969104	0.6018342802	159	244.00001	1642.56769151	538.00001	1556.17904522	0.1485479175	0.3457185802	2.2049179834	0.9474063402	2.327320274	4.6399137943	6.3345337115
Andreev	ENST00000362074	0.00001	0.00001	0.0288154642	0.0480257097	0.0002082218	0.0003470359	18	0.00001	1.1366099787	0.00001	1.8943474386	8.79809273875E-006	5.27886268171E-006	1	1.6666644445	0.6000008	0.0675723232	35.9293666941
Andreev	ENST00000228506	1.00001	7.00001	47.4059765288	36.2426804226	0.1931427234	0.0210945976	48	591.00001	867.134320673	237.00001	662.939029396	0.6815553207	0.3574989546	0.4010152386	0.7645171153	0.5245340236	0.3346588367	4.966804971
Andreev	ENST00000280557	13.00001	6.00001	44.7410618418	41.6901409317	0.1439191585	0.2905610521	24	288.00001	1111.06970241	155.00001	1035.30516647	0.2592096692	0.149714321	0.5381944605	0.9318093763	0.577580001	0.5335144023	4.1982916327
Andreev	ENST00000334295	4.00001	1.00001	141.401985328	129.938709893	0.007696013	0.0282882167	87	1486.00001	1466.02977891	567.00001	1347.1806474	1.0136219819	0.420878975	0.3815612424	0.9189312978	0.4152228173	-0.3679623007	11.3465630965
Andreev	ENST00000396203	7.00001	10.00001	246.370088155	284.852620906	0.0351059083	0.0284125807	75	916.00001	2125.35262715	364.00001	2457.32860968	0.4309873093	0.1481283409	0.3973799192	1.1561980719	0.3436953658	-0.9585655236	5.226762449
Andreev	ENST00000373279	0.00001	2.00001	12.6760565915	11.6873241972	0.1711264243	7.88888873111E-007	27	151.00001	171.361505775	76.00001	157.995308592	0.8811781229	0.4810270044	0.5033112912	0.9220000016	0.5458907704	0.4331983994	2.2982455636
Andreev	ENST00000369046	1.00001	0.00001	2.8933268826	2.6259133415	3.80819878636E-006	0.3456263466	18	198.00001	254.934246434	57.00001	231.372142197	0.7766708976	0.2463564086	0.2878788238	0.907575759	0.3171953647	-1.2316683843	2.6382488175
Andreev	ENST00000274605	1.00001	0.00001	0.4796053076	0.5062500444	1.9753084687E-005	2.0850686684	27	20.00001	29.0250026875	11.00001	30.6375026875	0.6890614349	0.3590374226	0.550000225	1.0555555504	0.5210528473	-0.0389329552	7.419847045
Andreev	ENST00000370966	10.00001	4.00001	10.8754906694	12.0798081574	0.3311319143	0.9194996625	21	132.00001	819.804844272	34.00001	910.587443487	0.1610139424	0.0373385447	0.2575758138	1.1107368416	0.231896345	-2.5837662536	2.393870588
Andreev	ENST00000528372	1.00001	1.00001	3.7487091842	3.5380379277	0.2826453589	0.2667611572	18	149.00001	429.018939966	86.00001	404.90878506	0.3473040375	0.2123935394	0.5771812364	0.9438016538	0.6115492954	0.4508250512	2.92792784
Andreev	ENST00000333479	4.00001	7.00001	7.6748387355	7.2980645419	0.9591597827	0.5211848923	18	1066.00001	2826.47255431	613.00001	2687.71499158	0.3771485445	0.2280747817	0.5750469083	0.9509078684	0.6047346199	0.5222269613	18.7760413407
Andreev	ENST00000303319	27.00001	29.00001	74.1392761003	68.0222844568	0.4263310212	0.3641795742	48	1168.00001	1374.66574436	426.00001	1261.2465243	0.8496611011	0.3377610973	0.3647260328	0.9174932375	0.3975244916	-0.5459978677	3.2431192611
Andreev	ENST00000409302	3.00001	2.00001	22.5699490415	30.0077728756	0.0666497313	0.1329205482	66	6.00001	145.33679307	4.00001	193.23187079	0.0412834897	0.0207005707	0.6666672222	1.3295454421	0.501424924	-0.0005877097	23.0156706854
Andreev	ENST00000367837	22.00001	22.00001	30.0104705445	26.8634650998	0.818956524	0.7330778092	51	1630.00001	1208.65699016	441.00001	1081.91288853	1.3486042966	0.4076113841	0.2705521517	0.8951364178	0.3022468378	-1.3343778567	6.5072886108
Andreev	ENST00000282096	2.00001	3.00001	9.6221199342	9.3614221067	0.3204651992	0.2078554428	72	154.00001	446.092171392	77.00001	434.005930444	0.3452201582	0.1774169535	0.5000000325	0.9729064043	0.5139240838	-0.0947374459	13.7950905678
Andreev	ENST00000281543	5.00001	8.00001	11.215104592	10.725556379	0.7458829843	0.4458282095	33	268.00001	682.761973497	122.00001	652.958871677	0.3925233396	0.1868417986	0.4552239009	0.9563492066	0.4760017552	-0.2178379502	4.8205127896
Andreev	ENST00000291672	9.00001	8.00001	5.992184238	5.314806904	1.5052306028	1.5019581579	30	315.00001	204.13374304	149.00001	181.057755198	1.5431060309	0.822941883	0.4730158897	0.8869565242	0.5333022272	0.1292820686	4.6155641664
Andreev	ENST00000308025	6.00001	7.00001	19.7660099261	16.4261084483	0.4261514541	0.3035519067	24	1108.00001	2027.66318492	343.00001	1685.04495832	0.5464418441	0.2035554056	0.3095667932	0.831028038	0.3725106483	-0.7895200776	3.8097686235
Andreev	ENST00000432176	2.00001	6.00001	5.3541018646	5.4708962791	1.0967142665	0.3735472448	27	358.00001	310.339608078	81.00001	317.109358401	1.1535749891	0.2554324174	0.2262570049	1.0218140068	0.2214267992	-2.4305854993	5.1037310164
Andreev	ENST00000510164	44.00001	32.00001	36.9991960016	32.9951734755	0.9698391198	1.1892153007	63	49.00001	538.543852912	36.00001	480.263080587	0.0909861096	0.074958937	0.7346939317	0.8917808234	0.8238503368	1.5462184532	14.7544483723
Andreev	ENST00000345254	2.00001	1.00001	27.9156328559	24.3627341417	0.0410467066	0.0716448024	45	1545.00001	2037.22085108	883.00001	1777.93819825	0.7583861166	0.4966426903	0.5715210384	0.8727272732	0.6548678561	0.8080235973	12.2636009966
Andreev	ENST00000378863	24.00001	17.00001	50.6505813062	45.2887824179	0.3753691111	0.4738348382	81	330.00001	565.910815829	167.00001	506.004297385	0.5831307704	0.3300367425	0.506060621	0.8941414146	0.5659738077	0.6680133155	11.7633821825
Andreev	ENST00000449549	0.00001	0.00001	0.3424752383	0.3424752383	2.91991913075E-005	2.91991913075E-005	27	4.00001	15.322595845	3.00001	15.322595845	0.2610530252	0.1957899321	0.750000625	1	0.750000625	0.4511864411	8.7189727715
Andreev	ENST00000315480	2.00001	0.00001	6.5895021265	5.5666219112	1.7964216287E-006	0.3035145845	48	230.00001	376.699871566	153.00001	318.225219255	0.6105656714	0.4807915927	0.6652174059	0.8447712444	0.7874527102	0.9492662043	7.2257550521
Andreev	ENST00000374492	4.00001	2.00001	9.6737886503	9.2579470662	0.2160316953	0.4134894967	42	113.00001	399.849930881	48.00001	382.661812069	0.2826060511	0.1254371575	0.424778812	0.9570135756	0.4438587109	-0.5080750563	3.6294846469
Andreev	ENST00000246151	1.00001	0.00001	35.4984405739	29.0904555459	3.43755359356E-007	0.0281705332	24	369.00001	939.229573518	157.00001	769.684969651	0.3928752037	0.2039795711	0.4254742703	0.8194854499	0.5191968574	0.2101301907	6.3554454816
Andreev	ENST00000451237	0.00001	1.00001	0.3825275207	0.2868958796	3.4856199451	2.61419099539E-005	162	1.00001	2.6824152066	2.00001	2.0118130815	0.3728020918	0.9941331123	1.9999900001	0.750000625	2.6666511113	1.4413765483	8.5287346519
Andreev	ENST00000281382	1.00001	0.00001	6.4548108892	7.1239070991	1.4037240886E-006	0.1549247557	54	48.00001	78.7725995554	6.00001	86.9380514504	0.6093490664	0.0690147743	0.1250001823	1.1036585303	0.1132598343	-4.3597853896	4.4409825977
Andreev	ENST00000436390	36.00001	41.00001	159.184615846	133.200000462	0.3078078818	0.2261525701	105	431.00001	2013.30637946	295.00001	1684.66286298	0.2140757186	0.175109226	0.6844547637	0.83676428	0.8179779898	1.8917707743	4.8499577295
Andreev	ENST00000310473	192.00001	119.00001	92.1410322338	84.3137724136	1.411394682	2.0837623081	111	187.00001	771.16233284	267.00001	705.653104255	0.2424911099	0.3783728979	1.4278074638	0.9150513118	1.5603578132	3.4697676791	8.4941921809
Andreev	ENST00000619594	34.00001	24.00001	28.5785799884	27.6495927939	0.8680059117	1.1897025679	21	241.00001	410.987197928	74.00001	397.627477322	0.5863929855	0.1861038641	0.3070539707	0.9674935845	0.3173705496	-1.329797637	3.2438642241
Andreev	ENST00000317269	7.00001	1.00001	9.1783784324	7.4756757297	0.1337685095	0.7626630403	18	192.00001	1074.89009642	91.00001	875.484691015	0.1786229221	0.1039424343	0.4739583607	0.8144876336	0.5819098304	0.4752110751	2.8252212264
Andreev	ENST00000376810	0.00001	0.00001	6.1513988508	5.748217282	1.73966979839E-006	1.62564649807E-006	21	337.00001	297.610534877	135.00001	278.104226594	1.1323524221	0.4854295516	0.4005934896	0.9344569295	0.4286912291	-0.3102050528	7.5150501044
Andreev	ENST00000269468	3.00001	1.00001	5.5618288371	4.9763731758	0.2009515695	0.5393927228	18	382.00001	561.435722053	128.00001	502.337225581	0.6803984766	0.2548089281	0.3350785514	0.8947368432	0.3744995571	-0.7830296626	2.6838638564
Andreev	ENST00000277165	1.00001	0.00001	49.0357562427	46.5211020809	0.000000215	0.0203934858	45	1126.00001	3656.97773223	400.00001	3469.44041297	0.30790453	0.1152923706	0.3552397926	0.9487179488	0.3744419435	-0.7949021086	3.6166666393
Andreev	ENST00000336308	0.00001	1.00001	7.3184803987	6.510788091	0.1535927734	1.3664038783E-006	21	125.00001	465.94325205	44.00001	414.520175127	0.2682730342	0.1061468479	0.3520000518	0.8896366098	0.3956672286	-0.6274557326	11.5457141208
Andreev	ENST00000394264	0.00001	3.00001	4.7173913505	5.1785244203	0.5793175346	2.11981564748E-006	21	166.00001	193.862320736	71.00001	212.812694034	0.8562778438	0.3336267619	0.4277108778	1.0977517097	0.3896244242	-0.6835016868	3.5119047271
Andreev	ENST00000256015	4.00001	13.00001	19.4000001667	21.7833335	0.5967869885	0.2061860807	78	185.00001	128.08974469	109.00001	143.825855801	1.4442999356	0.7578610215	0.5891892114	1.1228522326	0.5247255109	0.3919049018	16.8693360303
Andreev	ENST00000313093	0.00001	0.00001	0.7470162462	0.8453078446	0.00001183	1.33865897173E-005	42	24.00001	60.6506047508	11.00001	68.6309464311	0.3957093272	0.1602776965	0.458333559	1.1315789301	0.4050389653	-0.4576648876	59.2558001731
Andreev	ENST00000224337	0.00001	0.00001	0.1294844899	0.1109867321	9.01008599329E-005	7.72293269018E-005	33	1.00001	5.3755682175	1.00001	4.6076309978	0.1860287061	0.2170334388	1	0.8571430612	1.1666663889	0.5801585638	3.3333222223
Andreev	ENST00000261593	7.00001	9.00001	86.3142858571	99.7142858571	0.0902579798	0.0810990896	51	375.00001	1247.32605248	186.00001	1440.96918974	0.3006431312	0.1290797967	0.4960000134	1.1552466068	0.4293455705	-0.245652717	4.808149365
Andreev	ENST00000618655	1.00001	0.00001	7.84138916	7.2219616612	1.38466534013E-006	0.1275296991	30	211.00001	325.156270502	86.00001	299.470676884	0.6489187789	0.2871733917	0.4075829665	0.9210053874	0.4425413489	-0.4538903857	2.5426573249
Andreev	ENST00000356998	0.00001	0.00001	0.3419545115	0.3419545115	2.92436557023E-005	2.92436557023E-005	102	0.00001	3.2351578784	1.00001	3.2351578784	0.000003091	0.3091070166	100001	1	100001	1.7749456955	25.7288091985
Andreev	ENST00000299314	0.00001	0.00001	6.5756885178	5.8852833257	1.69915354054E-006	1.52075329799E-006	24	152.00001	1032.93107134	56.00001	924.479922417	0.1471540689	0.0605746092	0.3684210942	0.8950064027	0.4116407358	-0.5752797674	1.6377816149
Andreev	ENST00000346246	7.00001	5.00001	4.6949192648	5.0910794147	0.9821119634	1.4909755856	18	22.00001	438.714122412	10.00001	475.733087525	0.0501465735	0.0210202113	0.4545457025	1.0843806097	0.4191754246	-0.5552928809	3.8327813935
Andreev	ENST00000316763	4.00001	1.00001	7.4984521207	7.5634676006	0.1322158106	0.5334447611	21	320.00001	508.466467616	110.00001	512.875136347	0.6293433892	0.2144771743	0.3437500205	1.0086705201	0.3407951493	-1.049872426	2.3188405517
Andreev	ENST00000381334	7.00001	5.00001	26.1519710633	29.0710582002	0.1719927072	0.2676666314	21	578.00001	1212.95332455	228.00001	1348.34336605	0.4765228787	0.1690964006	0.3944636783	1.1116201578	0.3548547366	-1.1030287398	3.7463751352
Andreev	ENST00000274963	0.00001	0.00001	0.1063692745	2.65922521339E-007	37.6049382716	9.40121106487E-005	81	0.00001	2.5830662081	0.00001	6.45764937623E-006	3.87136805417E-006	1.548551093	1	0.0000025	400001	1.7101997013	25.9997400026
Andreev	ENST00000229238	23.00001	25.00001	106.410048865	67.1961104538	0.3720454924	0.2161450939	30	1319.00001	1369.14262874	375.00001	864.589954506	0.9633766288	0.4337316297	0.2843062981	0.6314827516	0.4502202117	-0.1246657236	3.9942014176
Andreev	ENST00000331373	35.00001	42.00001	36.4520112225	19.5474535818	2.1486179683	0.9601667734	93	403.00001	412.338879635	288.00001	221.117431914	0.9773514696	1.3024753748	0.7146402056	0.5362517163	1.3326581227	2.3833305224	30.0907715169
Andreev	ENST00000439853	28.00001	33.00001	10.5028098247	9.8031844568	3.3662541132	2.6659542034	63	45.00001	401.94086488	55.00001	375.1663131	0.1119567925	0.1466016753	1.2222221728	0.9333868384	1.30944869	2.7587940726	12.0027528424
Andreev	ENST00000369563	17.00001	24.00001	23.775380901	22.9949240482	1.0437090355	0.7150257685	75	235.00001	506.574115731	117.00001	489.945181721	0.4639005482	0.2388022464	0.4978723618	0.9671737393	0.5147703474	0.0339531031	16.3600525087
Andreev	ENST00000400334	3.00001	3.00001	8.1483394457	8.7367595534	0.343377883	0.3681744017	57	163.00001	399.554539486	72.00001	428.407771084	0.4079543439	0.1680642016	0.4417178257	1.0722134997	0.4119681629	-0.521263589	8.5455240683
Andreev	ENST00000360845	28.00001	20.00001	21.6660423934	17.0079627681	1.1759203776	1.2923453897	51	1151.00001	742.592982426	588.00001	582.939586642	1.5499742621	1.008680871	0.5108601259	0.7850055151	0.6507726584	0.7515852912	3.3434894989
Andreev	ENST00000328557	0.00001	0.00001	2.1587368292	1.7749614782	5.63392508685E-006	4.63233862732E-006	123	14.00001	36.4703669189	18.00001	29.9867475741	0.3838735714	0.6002654991	1.2857140816	0.8222222617	1.5637062404	1.3817238468	13.5294097751
Andreev	ENST00000394987	4.00001	8.00001	23.3390520813	23.6803613363	0.3378331051	0.1713869949	72	1197.00001	1018.81445405	692.00001	1033.71355111	1.174895002	0.6694311101	0.5781119501	1.0146239553	0.5697795198	0.3105749992	9.0349281864
Andreev	ENST00000305352	1.00001	0.00001	1.4107942833	1.3716055586	7.29072577551E-006	0.7088276525	57	20.00001	28.4138918804	16.00001	27.6246172155	0.7038814001	0.5791939079	0.8000001	0.9722222261	0.8228572424	0.7608761395	8.028985378
Andreev	ENST00000398013	48.00001	27.00001	88.9500005	89.5500005	0.3015076477	0.5396291144	114	189.00001	844.244741588	73.00001	849.93947843	0.2238687441	0.0858884801	0.3862434187	1.0067453625	0.3836555231	-0.7192151333	3.326605502
Andreev	ENST00000326974	15.00001	15.00001	195.597171781	157.793085872	0.0950612628	0.0766882765	93	528.00001	2414.46831403	150.00001	1947.81142561	0.2186816894	0.0770095134	0.2840909227	0.8067247825	0.352153459	-0.7899028986	19.2486701945
Andreev	ENST00000261439	0.00001	0.00001	8.5526317158	7.5810527684	1.31907801007E-006	1.16923075052E-006	78	160.00001	384.429830712	54.00001	340.758602642	0.416200818	0.1584699831	0.3375000414	0.8864000018	0.380753656	-0.8113919403	11.3461529734
Andreev	ENST00000286835	6.00001	10.00001	38.7431434701	43.4874792678	0.229951475	0.1548663702	57	1964.00001	2340.22180645	1055.00001	2626.79633542	0.8392366931	0.401629923	0.5371690451	1.1224561399	0.4785657328	-0.0872190004	12.7810650131
Andreev	ENST00000380338	5.00001	5.00001	14.7076196988	14.4683993798	0.3455814198	0.3399605172	60	330.00001	418.186653435	153.00001	411.384822366	0.7891213344	0.3719145717	0.4636363799	0.9837349399	0.4713021375	-0.0536031746	14.596566367
Andreev	ENST00000612662	438.00001	238.00001	415.804291728	348.754235273	0.6824290171	1.0533802049	312	5.00001	1298.05570559	88.00001	1088.73918319	0.0038519225	0.0808274483	17.5999668001	0.8387461174	20.9836641095	9.7391599818	10.797181221
Andreev	ENST00000398844	1.00001	0.00001	15.08382291	16.7436101778	5.9724276269E-007	0.0662968537	51	995.00001	970.392607209	401.00001	1077.17225477	1.0253581928	0.3722710163	0.4030150814	1.1100375732	0.3630643603	-1.0410847592	26.6330704467
Andreev	ENST00000368875	2.00001	6.00001	23.2965102435	20.328897891	0.2951468413	0.0858501973	30	1137.00001	1930.50414885	509.00001	1684.58800524	0.5889653284	0.3021510354	0.44766931	0.872615584	0.5130200724	0.252550604	4.7257360702
Andreev	ENST00000260952	134.00001	67.00001	388.989797106	383.051021596	0.174911451	0.3444820687	291	483.00001	2581.23470176	228.00001	2541.82653849	0.1871197569	0.0896992798	0.4720497004	0.9847328245	0.4793683004	-0.0257547483	9.102088708
Andreev	ENST00000377223	70.00001	26.00001	51.3722056466	36.0315655765	0.7215897945	1.3626047221	108	271.00001	272.082422499	81.00001	190.833847313	0.9960217478	0.4244530577	0.2988930148	0.7013824912	0.4261483834	-0.4256274312	10.5709023819
Andreev	ENST00000282570	3.00001	1.00001	18.5819614674	19.8962062777	0.0502613406	0.1614474341	51	46.00001	563.652831179	13.00001	603.518257091	0.0816105366	0.0215403757	0.2826088516	1.0707269151	0.2639411111	-1.6235272649	5.2102563912
Andreev	ENST00000373087	0.00001	0.00001	2.8703430402	2.9508199404	3.38888858081E-006	3.48390413961E-006	72	25.00001	71.7187101304	13.00001	73.7295148994	0.3485842112	0.1763202975	0.520000192	1.0280373806	0.5058183699	-0.090874753	9.4668505672
Andreev	ENST00000298875	5.00001	7.00001	16.5542002716	16.6163406628	0.4212726582	0.3020387526	54	1682.00001	719.801152549	535.00001	722.503108821	2.3367564834	0.7404812567	0.3180737258	1.0037537537	0.3168842205	-1.314554168	2.8383215879
Andreev	ENST00000370267	28.00001	26.00001	177.37705	179.262295902	0.1450389211	0.1578558782	135	486.00001	696.369159259	121.00001	703.770495021	0.6979057064	0.171931064	0.2489712089	1.0106284658	0.246352856	-1.8453945218	7.6916221918
Andreev	ENST00000392038	3.00001	1.00001	53.1849058302	45.6622643208	0.0219001404	0.0564071695	90	386.00001	853.913210274	128.00001	733.133021594	0.4520365833	0.1745931587	0.3316062349	0.8585568331	0.3862367896	-0.6167033269	6.6449382607
Andreev	ENST00000494664	23.00001	31.00001	91.8847120677	70.3546368797	0.4406249733	0.2503137843	69	670.00001	1141.23475713	366.00001	873.824982694	0.587083425	0.4188481873	0.5462686635	0.765683815	0.7134389584	1.0288086959	8.3440603086
Andreev	ENST00000342665	3.00001	4.00001	37.8816416048	31.7993521879	0.1257890405	0.0791942976	63	414.00001	569.427215868	177.00001	477.999786063	0.7270464046	0.3702930737	0.4275362457	0.8394396557	0.5093114708	0.267824814	6.2285505432
Andreev	ENST00000316495	44.00001	26.00001	52.7441881395	56.9302346512	0.4566995053	0.834215324	180	12.00001	128.051167872	13.00001	138.21395857	0.0937126166	0.0940571425	1.0833332639	1.0793650762	1.0036764092	2.1273987074	4.677247794
Andreev	ENST00000265070	14.00001	13.00001	53.8610807387	53.5314225248	0.2428482074	0.2599281301	69	530.00001	699.41345423	218.00001	695.132675105	0.7577778305	0.3136092113	0.4113207658	0.9938794727	0.4138537691	-0.5195438588	7.0189057029
Andreev	ENST00000253727	1.00001	5.00001	13.1801804955	11.9819822973	0.4172940567	0.0758722538	63	59.00001	289.127134044	64.00001	262.84284976	0.2040625146	0.243491539	1.0847457484	0.9090909113	1.1932203203	2.1850836646	6.7191976837
Andreev	ENST00000309534	53.00001	29.00001	109.477641998	112.202002398	0.2584624996	0.4841172045	78	611.00001	705.990434934	221.00001	723.559066747	0.865450833	0.3054346496	0.3617021381	1.0248850848	0.3529197014	-0.7606268944	5.1152629123
Andreev	ENST00000261558	25.00001	29.00001	19.9405300452	17.3083412405	1.6754933126	1.2537284587	114	235.00001	257.477721285	189.00001	223.490160579	0.9127003642	0.8456748588	0.8042553275	0.8679980523	0.9265635163	2.2869253769	5.3906215804
Andreev	ENST00000369842	29.00001	16.00001	341.116751878	288.791878782	0.0554032546	0.0850149101	84	2202.00001	3102.53807661	711.00001	2626.63089749	0.7097414941	0.2706889692	0.3228882865	0.8466071431	0.3813909309	-0.6234919711	4.3912355898
Andreev	ENST00000366647	39.00001	20.00001	127.629966379	114.34506286	0.1749092571	0.3055709494	114	625.00001	2286.14378374	275.00001	2048.18086281	0.2733861336	0.1342654914	0.440000009	0.895910781	0.4911203418	0.0665088662	6.4197508127
Andreev	ENST00000334351	304.00001	124.00001	289.978063622	280.069123224	0.442747878	1.048355197	171	6.00001	710.531044781	16.00001	686.251243456	0.0084444023	0.0233150907	2.6666638889	0.9658286552	2.7610113601	5.3280703241	3.0495492404
Andreev	ENST00000507416	12.00001	9.00001	77.6147275171	43.9469192979	0.2047927396	0.1546099611	87	68.00001	199.835620274	30.00001	113.150688767	0.3402797254	0.2651332513	0.4411765528	0.5662188183	0.7791626461	1.6671783527	26.7502954034
Andreev	ENST00000301998	2.00001	1.00001	4.5385451792	4.9923996851	0.2003064785	0.4406720482	33	95.00001	164.07528481	62.00001	180.482812859	0.5790025604	0.3435230702	0.6526316155	1.0999999974	0.5933014701	0.3794057535	2.2392637693
Andreev	ENST00000329565	0.00001	0.00001	8.172101567	5.9818841757	1.67171407975E-006	1.22367544235E-006	39	6.00001	55.7379235085	5.00001	40.7995177114	0.1076468161	0.1225507134	0.8333336111	0.7319884765	1.1384518171	2.5471113613	4.4701986015
Andreev	ENST00000368494	1.00001	1.00001	35.9666382164	34.6578272669	0.0288537995	0.0278038218	30	18.00001	1056.22027562	14.00001	1017.78486074	0.0170419092	0.0137553726	0.7777779012	0.9636104175	0.8071497434	1.6304915125	6.2747662379
Andreev	ENST00000331495	0.00001	0.00001	0.4125823848	0.4915875055	2.03422582722E-005	2.42375834955E-005	36	7.00001	37.8429731822	3.00001	45.0894984199	0.1849751595	0.0665345614	0.4285722449	1.191489321	0.359694575	-0.596515284	5.7037015912
Andreev	ENST00000340258	1.00001	0.00001	1.049711733	0.9689646855	1.0320293556E-005	0.9526520172	42	10.00001	24.1183767234	2.00001	22.2631171793	0.4146220168	0.0898351288	0.2000008	0.9230769315	0.2166675313	-1.6754989189	3.1217104236
Andreev	ENST00000244519	0.00001	0.00001	0.2658229247	0.2798135976	3.57380773691E-005	0.000037619	42	2.00001	11.1012716656	1.00001	11.6855488141	0.1801604411	0.0855766397	0.5000025	1.0526315513	0.4750023875	-0.2635475057	3.5321542841
Andreev	ENST00000264414	6.00001	6.00001	24.2670227681	22.3587005607	0.2683523572	0.2472495311	48	1595.00001	1165.82821882	766.00001	1074.14923944	1.3681260963	0.7131225177	0.480250787	0.9213615026	0.5212403444	0.2729408118	6.0433162271
Andreev	ENST00000233575	7.00001	11.00001	35.5332682485	33.581213454	0.3275643989	0.1969987661	30	1326.00001	1672.43249223	362.00001	1580.5557799	0.7928571205	0.2290333657	0.2730015138	0.9450640234	0.2888709199	-1.6027330996	7.7810451894
Andreev	ENST00000618852	3.00001	1.00001	22.3594081184	25.302325666	0.0395224539	0.1341721563	48	69.00001	696.86821969	38.00001	788.589149922	0.0990144306	0.0481873356	0.5507247028	1.131618759	0.4866698245	0.0597879563	3.3597883499
Andreev	ENST00000263390	0.00001	0.00001	4.6994329962	5.3440454726	1.87124156246E-006	2.12791628438E-006	33	131.00001	256.617523006	93.00001	291.817270958	0.5104873918	0.3186926178	0.7099236863	1.1371681386	0.6242908697	0.4538850728	3.4228186771
Andreev	ENST00000296490	17.00001	15.00001	61.1264850734	58.6512929001	0.2557490084	0.2781120161	42	535.00001	1369.52434414	206.00001	1314.06825283	0.3906465864	0.1567650764	0.3850467405	0.9595070423	0.4012964194	-0.4705307647	2.7768153285
Andreev	ENST00000368521	31.00001	23.00001	164.516979151	154.858314046	0.1485229265	0.1884304596	39	506.00001	3210.19028549	177.00001	3021.72248689	0.1576230581	0.0585758655	0.3498023844	0.9412907704	0.3716199026	-0.6249853186	6.3318518466
Andreev	ENST00000222803	3.00001	6.00001	7.3451613569	7.3518145827	0.8161264042	0.4084335053	33	167.00001	141.338710958	96.00001	141.466735151	1.1815588869	0.6786048317	0.5748503249	1.0009057971	0.5743300983	0.5445199066	29.4222775169
Andreev	ENST00000310574	7.00001	9.00001	26.5515321448	21.9275767131	0.4104425271	0.2636386466	36	975.00001	1406.49366112	514.00001	1161.55246644	0.6932132273	0.4425112295	0.527179492	0.8258497699	0.6383479311	0.9813161134	10.8318936517
Andreev	ENST00000388948	0.00001	0.00001	0.3660540399	0.3871725381	2.58282781322E-005	2.73183708148E-005	54	3.00001	40.9912736892	6.00001	43.3561544088	0.0731865524	0.1383888881	1.9999966667	1.0576922966	1.8909059592	1.4340316216	46.313781633
Andreev	ENST00000271843	3.00001	9.00001	200.340326667	170.937063263	0.0526510157	0.0149745688	42	532.00001	2098.80342222	81.00001	1790.76923419	0.2534777695	0.0452319643	0.152255655	0.8532334259	0.178445488	-2.5522161242	13.698099606
Andreev	ENST00000341114	7.00001	10.00001	2.7228609579	2.7228609579	3.6726113286	2.5708290318	39	7.00001	123.50618037	7.00001	123.50618037	0.0566774066	0.0566774066	1	1	1	1.4750619138	3.8909444891
Andreev	ENST00000335791	8.00001	0.00001	27.1969255174	28.5629811059	3.50103512058E-007	0.2941512633	105	66.00001	235.188651141	24.00001	247.001779468	0.2806258282	0.0971653324	0.3636364601	1.0502283094	0.3462451515	-1.0049765116	5.0106651057
Andreev	ENST00000292577	52.00001	35.00001	22.3881623904	23.0643149232	1.5174961891	2.3226564598	132	5.00001	158.07399506	1.00001	162.84804173	0.0316308195	0.0061407555	0.2000016	1.0302013413	0.1941383611	-2.9371646739	3.610065123
Andreev	ENST00000305103	13.00001	13.00001	51.9264395266	44.0036427312	0.2954303142	0.2503543497	147	63.00001	238.084491435	23.00001	201.758198645	0.2646119855	0.1139978953	0.3650794659	0.8474226836	0.4308115335	-0.4660354328	11.3900087393
Andreev	ENST00000323557	158.00001	38.00001	170.753365111	145.251609699	0.2616150697	0.9253112517	195	244.00001	1149.73932508	57.00001	978.027505304	0.2122220269	0.0582805797	0.2336065888	0.8506515207	0.2746207855	-1.6149180034	23.8536677128
Andreev	ENST00000373095	0.00001	1.00001	13.6911200386	10.7027030502	0.0934352747	7.30400432675E-007	144	12.00001	109.719114754	10.00001	85.770273055	0.1093702772	0.116590628	0.8333334722	0.7817258939	1.0660174861	1.8926105038	9.5510905907
Andreev	ENST00000262644	4.00001	9.00001	64.2964302139	69.6930130726	0.1291379093	0.0622120075	111	425.00001	625.007641449	191.00001	677.466316265	0.6799917022	0.281932851	0.4494117777	1.0839328535	0.4146121932	-0.3966631447	8.1943917691
Andreev	ENST00000346473	9.00001	32.00001	27.4668885762	38.0132461921	0.8418120841	0.3276676197	105	14.00001	133.149012241	30.00001	184.273736302	0.1051454289	0.1628013335	2.1428563265	1.3839662285	1.548344376	2.9429524748	3.8166238136
Andreev	ENST00000297661	14.00001	15.00001	54.0131630238	54.5857407203	0.2747972236	0.2591962628	87	328.00001	936.228159079	169.00001	946.152839152	0.3503419619	0.1786180869	0.5152439172	1.0106007067	0.5098392608	0.2385622571	8.0172004626
Andreev	ENST00000345146	12.00001	7.00001	47.3803530227	54.5591943325	0.1283011981	0.2532697465	90	558.00001	654.901768447	344.00001	754.129308329	0.8520361936	0.456155206	0.6164874621	1.1515151503	0.5353706913	0.3947384894	8.943856056
Andreev	ENST00000322428	37.00001	27.00001	225.187836494	198.354205009	0.1361201795	0.1643073204	180	333.00001	963.303522779	99.00001	848.515210316	0.3456854482	0.1166744082	0.2972973184	0.8808388948	0.3375161113	-1.2930730053	5.0273136414
Andreev	ENST00000564996	0.00001	4.00001	18.6792457386	16.9935577497	0.235383906	5.35353522296E-007	99	122.00001	349.056612287	63.00001	317.556382191	0.3495135336	0.1983899979	0.5163934823	0.9097560998	0.5676174992	0.1581253405	14.9968649687
Andreev	ENST00000326266	20.00001	30.00001	68.3128969979	64.109937167	0.4679463329	0.2927706316	84	678.00001	833.579993129	270.00001	782.293876145	0.8133592644	0.3451388516	0.3982300974	0.9384748706	0.4243375181	-0.3802454149	4.5586956412
Andreev	ENST00000303391	1.00001	2.00001	38.7315565017	34.1337459353	0.0585933347	0.0258189985	105	353.00001	538.553071356	142.00001	474.621610148	0.6554600257	0.2991857239	0.4022663059	0.8812903229	0.4564515182	-0.1478766513	7.5412930272
Andreev	ENST00000266000	21.00001	25.00001	101.267843807	81.9278591558	0.3051466285	0.2073709601	96	717.00001	2343.92863477	403.00001	1896.28857338	0.3058966896	0.212520402	0.5620641623	0.809021463	0.6947456749	0.9971661334	4.5485555663
Andreev	ENST00000264645	4.00001	4.00001	69.7040818294	68.6807582143	0.0582406209	0.057385592	81	900.00001	1816.60884867	409.00001	1789.93926655	0.4954286173	0.2284993785	0.4544444505	0.9853190288	0.4612155426	-0.1459494956	7.3023923096
Andreev	ENST00000361813	22.00001	14.00001	139.714191913	115.051546596	0.1216846745	0.15746439	93	632.00001	4582.02457348	208.00001	3773.19588298	0.1379302969	0.0551256856	0.3291139347	0.8234778802	0.3996633578	-0.5166889437	4.2617605863
Andreev	ENST00000242719	3.00001	0.00001	59.3774322471	52.4659536479	1.90599794814E-007	0.0505244145	105	29.00001	262.391700597	6.00001	231.849547549	0.1105218265	0.0258788946	0.2068968252	0.8836009181	0.2341518903	-2.3914682266	11.1417338094
Andreev	ENST00000439220	8.00001	16.00001	124.342105816	109.586842658	0.1460030202	0.0643387045	105	1033.00001	1601.05263869	367.00001	1411.06105975	0.6452005293	0.2600879724	0.3552759017	0.8813333339	0.4031118398	-0.5527963458	5.0040072677
Andreev	ENST00000284268	8.00001	9.00001	18.7628917859	17.4272828624	0.5164321984	0.4263740414	132	104.00001	210.087530755	68.00001	195.13275811	0.4950318071	0.3484807505	0.6538461871	0.9288164672	0.7039562823	1.0404683192	9.5263070656
Andreev	ENST00000607016	7.00001	5.00001	59.3881879051	51.1741545886	0.0977057665	0.1178687252	120	183.00001	256.359011124	49.00001	220.901767307	0.7138427052	0.2218180986	0.2677596029	0.8616891068	0.3107380617	-1.0950321267	6.758439593
Andreev	ENST00000492406	40.00001	31.00001	55.6135489293	55.0202322664	0.5634292827	0.7192493694	174	176.00001	407.193455954	139.00001	402.849286824	0.4322270101	0.3450422144	0.7897727392	0.9893314368	0.7982893395	1.726816975	7.696716519
Andreev	ENST00000457542	3.00001	2.00001	7.3465156319	6.1704924018	0.3241248623	0.4083582137	105	69.00001	316.669807143	31.00001	265.977605816	0.2178926075	0.1165512033	0.4492754421	0.8399209518	0.5349020538	0.073066063	11.2681991258
Andreev	ENST00000370113	5.00001	4.00001	18.914286	20.5428574286	0.1947153659	0.2643509779	81	92.00001	231.641626074	62.00001	251.586599619	0.3971652745	0.2464360586	0.6739130789	1.0861027177	0.6204874253	0.676868084	5.46326934
Andreev	ENST00000484952	10.00001	12.00001	126.374363977	119.490662789	0.1004263406	0.0791300521	153	1103.00001	1587.52632395	583.00001	1501.05263974	0.6947916349	0.3883941139	0.5285584812	0.9455292911	0.5590080457	0.4085292608	4.4720138359
Andreev	ENST00000262879	6.00001	4.00001	29.8334296352	26.7094541071	0.1497600806	0.2011170044	93	576.00001	1438.42041381	309.00001	1287.79776577	0.4004392627	0.2399445147	0.5364583414	0.8952860745	0.5992032677	0.4877104121	3.816131819
Andreev	ENST00000376901	8.00001	11.00001	113.300712544	122.508897598	0.0897894783	0.0706086469	90	969.00001	1109.08808613	402.00001	1199.22598649	0.8736907574	0.3352162266	0.4148606872	1.0812720842	0.3836783481	-0.7190318373	5.0826494625
Andreev	ENST00000358932	104.00001	80.00001	121.399595233	117.565923834	0.6804693689	0.8566750968	135	20.00001	749.080465402	24.00001	725.425292989	0.0266994147	0.0330840546	1.1999999	0.9684210529	1.2391303312	2.9311653076	20.8056647981
Andreev	ENST00000449309	23.00001	21.00001	31.7625009315	36.9786299637	0.5678958366	0.7241246541	231	88.00001	236.63750694	56.00001	275.498797262	0.3718768472	0.2032677114	0.6363636777	1.1642228691	0.546599534	0.0669373348	10.6521191328
Andreev	ENST00000287461	33.00001	24.00001	63.5235414181	61.7744576854	0.38851025	0.5194926048	141	274.00001	676.683398652	199.00001	658.051315202	0.4049161108	0.3024080424	0.7262773823	0.9724655822	0.7468412205	1.5046931038	6.5406670185
Andreev	ENST00000371320	0.00001	5.00001	34.7549357679	44.5536839624	0.1122243899	2.87728916168E-007	159	30.00001	254.869528965	3.00001	326.727015725	0.1177073231	0.0091820078	0.1000003	1.2819383198	0.0780071073	-4.7642644084	15.9906672515
Andreev	ENST00000283629	26.00001	13.00001	439.359692228	437.415622797	0.0297200404	0.0591770489	336	329.00001	2120.9566095	143.00001	2111.57184576	0.1551186896	0.067722067	0.4346504731	0.9955752212	0.436582253	-0.2163950562	25.3747592764
Andreev	ENST00000394785	30.00001	10.00001	46.4491373321	42.8598858925	0.2333186333	0.6458679692	330	51.00001	227.037753081	22.00001	209.493927105	0.2246322883	0.105015025	0.4313726605	0.9227272745	0.4674974637	-0.3617436064	15.7125730535
Andreev	ENST00000343348	6.00001	2.00001	4.4284676258	4.6107880678	0.4337674971	1.3548727251	33	266.00001	414.933996935	149.00001	432.016869863	0.6410658369	0.3448939622	0.5601503925	1.0411700971	0.5380008454	0.0889088805	12.1263790766
Andreev	ENST00000300181	5.00001	4.00001	10.6793959337	10.2085608519	0.3918289814	0.4681922115	51	74.00001	248.557705359	31.00001	237.599249631	0.2977176261	0.1304718346	0.4189189974	0.9559118245	0.4382402087	-0.4844180372	12.4797679297
Andreev	ENST00000356175	5.00001	2.00001	9.3807636669	8.4634363736	0.2363118138	0.5330067122	45	836.00001	1762.74972371	488.00001	1590.37373277	0.4742590504	0.3068461205	0.5837320624	0.9022118747	0.6470010857	0.5970351596	3.1626152424
Andreev	ENST00000361528	2.00001	10.00001	10.5643342619	13.451918912	0.7433891079	0.1893171827	39	436.00001	519.819421756	224.00001	661.903394668	0.8387528279	0.3384179803	0.513761479	1.2733333288	0.4034776028	-0.7653937063	4.4447368129
Andreev	ENST00000529930	0.00001	2.00001	14.3132534458	12.101205253	0.1652736201	6.98653177482E-007	36	148.00001	203.566271229	73.00001	172.106030265	0.7270360119	0.424157189	0.4932432775	0.8454545501	0.5834060239	0.4061870217	5.8387942078
Andreev	ENST00000269740	5.00001	2.00001	18.4114516178	16.3901466911	0.1220251434	0.2715706563	33	333.00001	526.679100826	168.00001	468.857529587	0.6322635728	0.3583178245	0.5045045194	0.8902147984	0.5667222341	0.4842054298	14.8719746935
Andreev	ENST00000392102	4.00001	7.00001	25.7690760399	24.3382324723	0.2876137373	0.1552252007	69	795.00001	1344.10006764	358.00001	1269.46809664	0.5914738263	0.2820078826	0.4503144723	0.9444743938	0.4767884394	-0.099768042	8.5571065447
Andreev	ENST00000487099	2.00001	1.00001	5.7683118091	4.6418717579	0.2154324919	0.3467236284	33	69.00001	252.057746326	25.00001	202.835729543	0.2737468338	0.1232524963	0.362318933	0.8047192856	0.4502426368	-0.3306876943	7.7164365406
Andreev	ENST00000297625	0.00001	0.00001	1.9065333807	2.2539857096	4.43658535962E-006	5.24512190607E-006	57	114.00001	71.7124134792	50.00001	84.781497568	1.5896830753	0.5897514367	0.4385965405	1.1822429821	0.3709867998	-0.7468789438	5.1693170705
Andreev	ENST00000366962	26.00001	24.00001	37.1808992923	30.3336203076	0.7912016356	0.6992840543	81	341.00001	750.044314119	205.00001	611.915254106	0.4546398174	0.3350137272	0.6011730322	0.8158388012	0.7368772254	1.4599096702	4.3129123062
Andreev	ENST00000369063	6.00001	4.00001	6.4922714625	6.9916769322	0.5721102446	0.9241773137	60	123.00001	128.763384007	51.00001	138.668259156	0.9552405829	0.3677843099	0.4146341939	1.0769230727	0.3850174673	-0.8201747632	2.7160988463
Andreev	ENST00000458549	0.00001	0.00001	12.2041226176	12.9101462317	7.74584564768E-007	8.19395241539E-007	72	39.00001	193.570944851	23.00001	204.769263842	0.2014765699	0.1123215934	0.5897436949	1.057851239	0.557492087	0.290340576	12.1100969075
Andreev	ENST00000303407	5.00001	7.00001	24.3630574575	21.7887474788	0.3212672049	0.2052291675	75	680.00001	708.152870099	262.00001	633.32626005	0.9602446572	0.4136888465	0.3852941267	0.8943355126	0.4308160878	-0.5385783235	5.9876627622
Andreev	ENST00000498286	2.00001	1.00001	3.7502072727	3.2030948107	0.3122011864	0.5333065227	36	523.00001	216.470297576	269.00001	184.889750463	2.416035899	1.4549211588	0.5143403535	0.8541114071	0.6021935185	0.4562684066	8.8134555227
Andreev	ENST00000512111	2.00001	2.00001	11.6847458644	10.2915255254	0.1943356206	0.1711641848	33	363.00001	659.302933319	120.00001	580.691531162	0.5505815182	0.206650181	0.3305785308	0.8807658844	0.3753307623	-0.9396944331	6.0948395245
Andreev	ENST00000296440	0.00001	0.00001	0.9718606174	0.8572029105	1.16658493304E-005	1.02895413407E-005	39	25.00001	159.659255785	16.00001	140.823052509	0.1565835308	0.1136178326	0.640000144	0.8820224785	0.7256052534	0.4023970391	2.9493432843
Andreev	ENST00000332439	5.00001	2.00001	35.7101740182	29.85722446	0.0669857978	0.1400163997	63	183.00001	388.844117087	116.00001	325.111999675	0.4706256362	0.3568001492	0.6338798014	0.8360985428	0.7581400624	1.7769851672	11.6844918224
Andreev	ENST00000373983	0.00001	1.00001	5.8470716811	6.627982744	0.150876977	1.71025780858E-006	36	279.00001	318.502987964	180.00001	361.040948918	0.8759729753	0.4985584337	0.645161303	1.1335559243	0.5691481904	0.2560070454	7.0399999259
Andreev	ENST00000432807	13.00001	7.00001	39.8817396783	36.4852179391	0.1918587964	0.3259639651	126	4.00001	80.3965228435	2.00001	73.5495663217	0.0497535199	0.0271926824	0.50000125	0.914835166	0.5465479122	0.5296375484	10.4844425912
Andreev	ENST00000262241	2.00001	4.00001	14.0802920438	14.2335767153	0.2810263421	0.1420432185	42	444.00001	488.4520359	196.00001	493.769554148	0.9089940821	0.3969463252	0.441441454	1.0108864696	0.4366874692	-0.3409012639	4.4750778468
Andreev	ENST00000377990	1.00001	6.00001	7.3878913135	7.2483325654	0.8277779677	0.135357974	51	291.00001	329.268175599	164.00001	323.048233749	0.8837781224	0.5076641593	0.5635738982	0.9811097995	0.5744248997	0.2639089214	7.7887787494
Andreev	ENST00000377045	1.00001	5.00001	15.8055330757	14.951179943	0.3344224348	0.0632696155	30	393.00001	958.869006591	139.00001	907.038249878	0.4098578714	0.1532460291	0.3536895839	0.9459459464	0.3739004171	-0.9143889071	2.9077711275
Andreev	ENST00000261211	4.00001	5.00001	6.458984917	6.090931032	0.8208942071	0.6192939063	30	275.00001	338.235510154	104.00001	318.961755042	0.8130429885	0.3260579313	0.3781818408	0.9430167604	0.4010340608	-0.7375761485	2.5399484372
Andreev	ENST00000367505	5.00001	4.00001	15.8711290765	14.6579642383	0.272889873	0.315038078	48	824.00001	1670.10568678	516.00001	1542.44536183	0.4933819557	0.3345337363	0.6262135968	0.9235615291	0.6780420979	0.8799055279	4.8993807291
Andreev	ENST00000366503	4.00001	6.00001	8.0040126078	8.6328992678	0.6950167972	0.4997505871	114	41.00001	82.0762345486	36.00001	88.5250810883	0.4995357088	0.4066645244	0.8780488102	1.078571423	0.8140849939	1.0802489218	10.1868757463
Andreev	ENST00000333957	4.00001	9.00001	42.076420408	40.5040579193	0.2222002057	0.0950653587	93	332.00001	1358.20875339	161.00001	1307.45356853	0.2444396041	0.1231401358	0.4849397746	0.9626307924	0.5037650763	0.0221783048	11.4058354429
Andreev	ENST00000350082	25.00001	13.00001	20.7782866579	20.3073906475	0.6401615168	1.2031795697	120	71.00001	328.643233973	43.00001	321.195228741	0.216039774	0.1338749961	0.6056338584	0.9773371107	0.6196775419	0.5902332579	3.6568578371
Andreev	ENST00000368607	3.00001	3.00001	12.5856171575	12.729452774	0.2356747029	0.2383681279	126	45.00001	118.564504492	33.00001	119.919527323	0.3795403202	0.2751846237	0.7333333926	1.0114285708	0.72504714	0.6596828289	6.9798926678
Andreev	ENST00000479665	44.00001	17.00001	35.1438590884	31.9456015448	0.5321549502	1.2519971096	87	146.00001	475.855931105	81.00001	432.550788734	0.3068155726	0.1872612699	0.554794551	0.9089952661	0.6103382182	0.9708286988	17.4293058806
Andreev	ENST00000431474	9.00001	3.00001	20.4864413263	17.5042379364	0.1713876383	0.4393154407	153	12.00001	214.371193225	5.00001	183.165261021	0.0559777171	0.0272978073	0.4166671528	0.8544303844	0.4876548873	-0.2187011047	15.5712839679
Andreev	ENST00000294964	2.00001	0.00001	27.884892494	29.3525183933	3.40686269778E-007	0.0717237838	102	28.00001	404.877703761	2.00001	426.187056279	0.0691567101	0.0046927986	0.0714289031	1.0526315782	0.067857458	-5.2923382398	11.2455932874
Andreev	ENST00000366835	5.00001	5.00001	21.1459251537	20.3962911859	0.2451430976	0.2364526481	128	250.00001	400.285755059	121.00001	386.095418309	0.6245538514	0.3133940582	0.4840000206	0.9645494835	0.5017886888	-0.0624265174	5.8626390911
Andreev	ENST00000357628	30.00001	13.00001	50.5058828824	51.9352946471	0.2503116635	0.5939904084	216	234.00001	445.200004667	110.00001	457.800004667	0.525606486	0.2402796175	0.4700854927	1.0283018865	0.45714736	-0.2187939903	6.7905771336
Andreev	ENST00000614363	38.00001	42.00001	253.147060348	291.858290294	0.1439054891	0.1501104139	114	8.00001	504.073532447	11.00001	581.156420147	0.0158707202	0.0189277957	1.3749995313	1.1529199268	1.1926236153	2.8042485611	6.8500603345
Andreev	ENST00000347230	6.00001	7.00001	10.017364431	7.7153489271	0.9072836583	0.5989609384	87	358.00001	877.267811493	166.00001	675.669465239	0.4080851997	0.245682273	0.4636871658	0.7701974886	0.6020367148	0.3767188953	5.9046454407
Andreev	ENST00000396852	11.00001	10.00001	24.1543077785	20.9166933891	0.4780875167	0.4554057231	135	64.00001	374.481230966	68.00001	324.286216766	0.170903118	0.2096913359	1.0624999902	0.8659612017	1.2269602705	2.3593607275	4.475142298
Andreev	ENST00000289865	1.00001	3.00001	50.2756269021	43.0523922779	0.0696827712	0.0198905526	105	95.00001	812.549893836	48.00001	695.808663768	0.1169159097	0.068984496	0.50526321	0.8563273087	0.5900351476	0.4406645405	6.5506829148
Andreev	ENST00000406341	14.00001	4.00001	71.659526103	54.7260712261	0.0730914884	0.1953684424	81	460.00001	3828.91887622	277.00001	2924.1288428	0.1201383536	0.0947290714	0.6021739217	0.7636956899	0.78849983	1.68567569	8.6509090647
Andreev	ENST00000361272	20.00001	17.00001	34.6998410531	32.0613338927	0.5302340214	0.5763718044	120	53.00001	247.814698187	24.00001	228.97135955	0.2138695178	0.1048166463	0.4528302919	0.9239619814	0.4900962389	0.161256675	3.1494985341
Andreev	ENST00000296564	5.00001	5.00001	38.2449856137	31.6689795585	0.157883521	0.1307363546	96	555.00001	2709.01981431	270.00001	2243.21938539	0.2048711519	0.1203627304	0.4864864957	0.828055732	0.5875045325	0.3206104025	10.7032766666
Andreev	ENST00000341119	11.00001	12.00001	43.5003712954	47.4252167837	0.253030156	0.2528716347	189	130.00001	233.8432658	65.00001	254.941906096	0.5559279612	0.2549600848	0.5000000385	1.0902255629	0.4586207253	-0.1352695254	8.6926042457
Andreev	ENST00000268989	1.00001	2.00001	35.6570020605	30.224552955	0.0661716983	0.028045263	102	85.00001	1102.92001471	39.00001	934.886907578	0.0770681544	0.0417162864	0.4588235931	0.8476470597	0.5412908448	0.175514213	49.4474514419
Andreev	ENST00000352511	14.00001	9.00001	41.9492430099	33.4936131985	0.2687082444	0.3337368924	162	255.00001	398.25886265	142.00001	317.982574687	0.6402870944	0.4465653822	0.5568627625	0.7984318857	0.697445546	1.1416863565	7.6222434552
Andreev	ENST00000378230	37.00001	31.00001	41.7394150078	37.2963888559	0.8311799333	0.8864525292	201	270.00001	576.668435207	120.00001	515.283939566	0.4682066739	0.2328813316	0.444444465	0.8935532242	0.49739003	-0.0886445786	5.3681917016
Andreev	ENST00000447648	5.00001	3.00001	6.2010970384	6.3180988665	0.4748279607	0.8063105559	96	162.00001	225.887878576	72.00001	230.14991392	0.7171700005	0.312839613	0.4444444787	1.0188679241	0.4362140256	-0.374464199	4.0032016649
Andreev	ENST00000372409	13.00001	6.00001	46.9690576775	46.3924286276	0.1293316642	0.2767781736	144	296.00001	689.531860626	124.00001	681.066625825	0.4292767701	0.1820673709	0.4189189386	0.9877232144	0.4241258406	-0.5867585332	3.5318675104
Andreev	ENST00000320934	10.00001	8.00001	14.8870726823	13.1447625081	0.608608181	0.6717244023	90	65.00001	389.875892357	50.00001	344.246724795	0.1667197467	0.1452446934	0.7692308047	0.882964891	0.8711907037	1.3689582463	3.3105022742
Andreev	ENST00000262435	14.00001	10.00001	33.9890338931	27.9746404729	0.3574669712	0.4118978505	90	118.00001	848.215223598	32.00001	698.122694469	0.1391156474	0.0458372293	0.2711865024	0.8230490034	0.3294901049	-1.376024078	8.6632709013
Andreev	ENST00000311413	30.00001	17.00001	107.599570032	90.781486071	0.1872629623	0.278811616	168	223.00001	833.256194119	94.00001	703.016151062	0.2676247852	0.1337096023	0.4215246896	0.8436974799	0.4996159165	0.1691084751	4.7216090147
Andreev	ENST00000562435	4.00001	0.00001	23.7241011924	21.9516108836	4.55547433536E-007	0.1686053338	102	98.00001	366.793211572	27.00001	339.38912121	0.2671805445	0.0795547303	0.275510278	0.9252873568	0.2977564494	-1.5614128088	8.2040133474
Andreev	ENST00000373275	2.00001	7.00001	15.0050084211	13.7798085265	0.5079903677	0.1332894953	84	324.00001	966.036732632	179.00001	887.157196563	0.3353909837	0.2017680865	0.5524691496	0.9183472704	0.6015906699	0.4101399519	31.1648932026
Andreev	ENST00000218056	6.00001	6.00001	43.9067801271	40.2711869068	0.1489901456	0.1366533821	99	248.00001	646.183622679	110.00001	592.677972961	0.3837918531	0.185598276	0.4435484095	0.9171974531	0.4835909738	-0.1116585201	4.6774066614
Andreev	ENST00000361443	0.00001	3.00001	2.7409572987	2.4101521645	1.2447388361	3.64836037566E-006	81	57.00001	49.8109770828	26.00001	43.7993084714	1.1443262778	0.5936169065	0.4561404463	0.8793103656	0.5187479463	-0.0840007379	10.5016283224
Andreev	ENST00000291906	14.00001	4.00001	108.461334124	78.8737785689	0.0507140658	0.1290783496	267	331.00001	1084.20711902	168.00001	788.442378279	0.3052922308	0.2130783614	0.507552885	0.7272064207	0.6979488499	0.7544417893	7.8739448066
Andreev	ENST00000320895	11.00001	10.00001	133.425600336	127.881600336	0.0781974105	0.0824430242	84	597.00001	2566.85440646	278.00001	2460.19840646	0.2325803943	0.1129990204	0.4656616505	0.9584487536	0.4858492942	0.0889092869	4.3171557508
Andreev	ENST00000344924	45.00001	40.00001	89.0347981574	82.2937827553	0.486063572	0.5054204753	117	188.00001	592.804339869	94.00001	547.921852704	0.3171366965	0.1715573298	0.5000000266	0.9242878566	0.5409570439	0.3505826549	4.6260869404
Andreev	ENST00000335965	7.00001	4.00001	68.7974591581	63.1358229388	0.0633556326	0.101748089	108	73.00001	658.671970087	29.00001	604.467045544	0.1108290823	0.0479761638	0.3972603565	0.9177057367	0.4328842467	-0.5231725312	5.5505952263
Andreev	ENST00000397463	3.00001	6.00001	20.0687474246	17.9524068641	0.3342175813	0.1494866589	138	11.00001	61.8059250397	11.00001	55.2882095452	0.1779766259	0.1989576094	1	0.8945454584	1.1178861741	2.4578687442	8.355437555
Andreev	ENST00000392446	20.00001	13.00001	49.2453878321	42.7020298985	0.3044354105	0.4061296069	123	239.00001	482.444653152	130.00001	418.341024616	0.4953936341	0.3107512827	0.5439330735	0.8671274972	0.6272815419	0.7205592829	9.1919694555
Andreev	ENST00000361735	22.00001	15.00001	55.2281337421	50.4093781064	0.2975638773	0.3983478801	96	959.00001	1207.54013255	601.00001	1102.18004839	0.7941765115	0.5452829698	0.6266944773	0.9127481718	0.6866017338	1.1327171571	4.1364670048
Andreev	ENST00000539826	3.00001	6.00001	10.1364476214	9.499692858	0.6316004201	0.2959626599	84	166.00001	543.989355681	90.00001	509.816850047	0.3051530481	0.1765340043	0.5421687023	0.9371816649	0.5785097197	0.2837774511	2.9636718634
Andreev	ENST00000550831	1.00001	4.00001	10.8713701245	10.6224074689	0.376563412	0.0919856457	120	8.00001	66.7683315145	3.00001	65.2392858714	0.1198174317	0.0459847155	0.3750007812	0.9770992384	0.3837898614	-0.7923268	4.279114492
Andreev	ENST00000358812	3.00001	5.00001	23.7836067541	22.4262297049	0.2229536603	0.126137723	90	181.00001	366.796068608	168.00001	345.862298116	0.493462241	0.4857424788	0.9281767995	0.9429280402	0.9843559211	2.3501938316	3.104438622
Andreev	ENST00000264451	12.00001	18.00001	44.9305243905	40.2814410839	0.446856158	0.2670792332	66	580.00001	1161.38597894	396.00001	1041.21421953	0.4994033168	0.3803252036	0.6827586262	0.8965272859	0.7615592263	1.6503262736	6.5090673455
Andreev	ENST00000296861	8.00001	8.00001	24.6976360139	22.6531297552	0.3531525262	0.3239180461	147	65.00001	330.477891424	53.00001	303.120450534	0.1966848969	0.174848018	0.8153846438	0.9172185444	0.8889753143	1.4213908069	8.9104040427
Andreev	ENST00000227756	1.00001	0.00001	14.6968853315	14.1409747883	7.07164827721E-007	0.0680423081	87	93.00001	307.958873095	40.00001	296.310310795	0.3019884086	0.1349936487	0.4301075882	0.9621749418	0.4470159942	-0.3251019093	3.6774192701
Andreev	ENST00000268797	6.00001	4.00001	20.3381942004	17.5555037018	0.2278493439	0.2950119337	87	105.00001	270.47460563	61.00001	233.468020494	0.388206537	0.2612777967	0.5809524209	0.8631790772	0.6730381171	0.6629128475	3.6031268575
Andreev	ENST00000428135	10.00001	8.00001	36.3921663662	35.9419540019	0.2225813877	0.2747846858	159	127.00001	657.576691636	73.00001	649.441722311	0.1931333814	0.1124042504	0.5748031831	0.9876288661	0.5820032229	0.4644346826	3.8325259383
Andreev	ENST00000358154	2.00001	0.00001	91.5773958722	92.049140344	1.08637625106E-007	0.0218395597	96	238.00001	911.958233894	71.00001	916.656022592	0.260976875	0.0774554558	0.2983193572	1.00515132	0.2967904944	-1.5638676127	15.3014612749
Andreev	ENST00000362065	4.00001	7.00001	25.7125334696	24.4612556123	0.2861672398	0.1555665452	120	126.00001	654.16970569	69.00001	622.335111538	0.1926105855	0.1108727577	0.5476190835	0.9513358783	0.5756316943	0.2880306567	11.4328062488
Andreev	ENST00000318709	0.00001	1.00001	25.6009740662	24.6419365411	0.040581632	3.90610137495E-007	93	318.00001	535.693500352	150.00001	515.625897946	0.5936230509	0.2909086037	0.4716981298	0.962539022	0.490056111	0.0520583885	11.5244641669
Andreev	ENST00000368073	8.00001	3.00001	93.0584513614	85.5811011422	0.0350545852	0.0859675815	129	488.00001	1293.44033559	273.00001	1189.51096394	0.3772883809	0.2295060897	0.5594262385	0.9196488862	0.6083041549	0.9585655054	4.3160220836
Andreev	ENST00000392222	73.00001	63.00001	305.01639459	312.245902787	0.2017640886	0.2393314304	126	295.00001	1638.85792966	116.00001	1677.70219196	0.1800034064	0.0691421937	0.3932203596	1.0237020315	0.3841160293	-0.662443238	5.6582877616
Andreev	ENST00000424310	7.00001	1.00001	29.3340716745	25.4547470136	0.0392857961	0.238630698	96	62.00001	608.376423999	18.00001	527.920846917	0.1019106059	0.0340960394	0.2903226951	0.8677536244	0.3345681158	-1.1020420679	21.410861739
Andreev	ENST00000378392	9.00001	10.00001	13.1755362336	9.9619909675	1.0038164091	0.6830849113	186	92.00001	165.048384001	49.00001	124.79268255	0.5574123646	0.3926513077	0.5326087465	0.7560975729	0.7044180084	0.4888440296	9.2779719469
Andreev	ENST00000294753	10.00001	7.00001	42.5498505191	32.9117320783	0.2126904164	0.235018687	237	138.00001	316.520617997	48.00001	244.824403604	0.4359905869	0.1960589275	0.3478261342	0.7734864324	0.4496861479	-0.4038221919	6.5679163904
Andreev	ENST00000608872	5.00001	8.00001	40.0892975575	33.2934997899	0.240287445	0.1247218162	108	116.00001	506.312980263	52.00001	420.48457142	0.22910732	0.123666868	0.4482759096	0.8304834911	0.5397770268	0.4874504418	5.7333333224
Andreev	ENST00000233027	6.00001	3.00001	43.2986628579	41.0569590441	0.0730694642	0.1385726395	93	339.00001	1175.58197544	108.00001	1114.71851168	0.2883678187	0.0968854548	0.3185840909	0.9482269505	0.3359787345	-1.1587329758	11.4357681659
Andreev	ENST00000376649	11.00001	19.00001	67.1306793283	65.7589157719	0.2889343563	0.1638596557	117	640.00001	736.142406651	383.00001	721.09990543	0.8693970137	0.5311330748	0.5984375063	0.9795657728	0.6109212091	0.7252896935	24.7168927248
Andreev	ENST00000304743	13.00001	4.00001	36.6632093637	31.2925150375	0.1278264146	0.3545791606	177	299.00001	1455.13585187	212.00001	1241.97693864	0.2054791033	0.1706956091	0.7090301101	0.8535127061	0.8307200409	1.3787465768	6.5398167263
Andreev	ENST00000318584	2.00001	2.00001	21.4654864376	19.2289918397	0.1040101331	0.0931732903	81	127.00001	394.063930033	68.00001	353.006306984	0.3222827575	0.1926311475	0.5354331074	0.8958097407	0.5977085123	0.4800905038	5.7093877085
Andreev	ENST00000261520	13.00001	17.00001	14.7815232293	15.4340409155	1.1014620275	0.8794770199	96	149.00001	453.9159425	88.00001	473.953673114	0.3282546305	0.1856721764	0.5906040543	1.0441441438	0.5656345993	0.2250723165	6.5536912438
Andreev	ENST00000394206	17.00001	14.00001	25.660378	21.2339629057	0.6593215813	0.6625003731	102	158.00001	140.880506667	78.00001	116.578619874	1.1215179001	0.6690764575	0.4936709181	0.8275000043	0.5965811668	0.5322173095	10.1049249814
Andreev	ENST00000350908	0.00001	1.00001	13.3976501099	12.7596667892	0.0783727363	7.46399549021E-007	99	170.00001	290.553078647	58.00001	276.717218146	0.5850910642	0.209600293	0.3411765093	0.9523809537	0.3582353343	-0.9574003817	10.7610609946
Andreev	ENST00000233615	4.00001	5.00001	59.2743439799	61.9335402705	0.0807318616	0.0674829906	111	42.00001	432.008507025	21.00001	451.389496206	0.0972203309	0.0465230365	0.500000119	1.0448625174	0.4785319702	-0.001558966	3.5590768048
Andreev	ENST00000308660	0.00001	5.00001	6.0843663918	5.6239278789	0.8890601209	1.64355651124E-006	138	41.00001	33.552194378	6.00001	31.0131095353	1.2219770051	0.1934668948	0.1463416716	0.9243243284	0.1583228604	-2.8187718458	3.4266834271
Andreev	ENST00000247161	0.00001	0.00001	41.7473101336	42.7692025269	2.33813104037E-007	2.3953639092E-007	81	79.00001	662.802973232	33.00001	679.02709197	0.11919079	0.0485989593	0.4177215927	1.0244780416	0.4077408941	-0.5132688566	4.8108107775
Andreev	ENST00000263274	9.00001	10.00001	70.5904259397	67.7765961525	0.1475437034	0.1274961849	138	1259.00001	1411.29699397	668.00001	1355.04078829	0.8920872186	0.4929740977	0.530579829	0.9601386484	0.5526075113	0.2974278395	4.8783958477
Andreev	ENST00000376004	8.00001	2.00001	20.1640782961	17.0956316942	0.1169895349	0.3967456326	129	122.00001	235.716512175	22.00001	199.846609262	0.5175709112	0.1100844797	0.180327936	0.8478260917	0.2126944875	-2.2141449454	10.9417213009
Andreev	ENST00000448775	0.00001	1.00001	0.9369087125	0.7417194381	1.3482321598	1.06733984498E-005	99	5.00001	10.6088350177	3.00001	8.3986615162	0.4713062265	0.3572009652	0.6000008	0.7916667101	0.7578957058	0.5123159037	11.0211145344
Andreev	ENST00000484302	57.00001	32.00001	123.887755974	112.458674342	0.2845490594	0.4600939742	171	223.00001	488.306125888	120.00001	443.258166704	0.4566807545	0.270722615	0.5381166126	0.9077464795	0.5928049569	0.6371858799	5.1096773723
Andreev	ENST00000356413	9.00001	3.00001	39.2521015966	32.9747906723	0.0909788944	0.2292873409	126	109.00001	317.443583547	76.00001	266.677076945	0.3433681311	0.2849889119	0.6972477342	0.8400770744	0.8299806714	1.5119665595	3.4376277416
Andreev	ENST00000620753	1.00001	2.00001	187.194412666	172.218859697	0.011613188	0.0053420932	96	183.00001	1992.84051817	54.00001	1833.41327719	0.0918287281	0.0294532666	0.2950820057	0.9200000002	0.3207413105	-1.0305794376	5.7680327633
Andreev	ENST00000368896	2.00001	2.00001	3.1448881108	3.6690358381	0.5451050598	0.6359558527	123	0.00001	7.2613676705	0.00001	8.4715949432	1.3771510346E-006	1.1804152662E-006	1	1.1666665741	0.8571429252	0.1935563599	5.265588874
Andreev	ENST00000304842	5.00001	2.00001	18.8846886578	21.0396981096	0.0950588734	0.2647652863	120	72.00001	174.998114896	42.00001	194.967869149	0.4114330605	0.2154201622	0.5833333912	1.1141141107	0.5235849592	0.0082698635	5.1884150058
Andreev	ENST00000397640	5.00001	7.00001	33.7545286117	30.42253666	0.2300929103	0.1481285684	144	19.00001	86.9647924648	4.00001	78.3802854225	0.2184793347	0.0510333686	0.2105267313	0.9012875579	0.2335844198	-2.3867928624	11.0764330426
Andreev	ENST00000228705	1.00001	0.00001	10.130017461	8.4611995797	1.18186551514E-006	0.0987175001	93	119.00001	168.180074837	34.00001	140.474109152	0.7075749616	0.2420375556	0.2857143457	0.835260118	0.3420663091	-1.0415576678	14.817072719
Andreev	ENST00000254235	0.00001	0.00001	3.193548651	3.1407627273	3.18393997521E-006	3.13131287253E-006	162	26.00001	63.9103995471	11.00001	62.8540293939	0.4068197067	0.1750088277	0.423077145	0.9834710757	0.4301876846	-0.3784231774	10.9340417335
Andreev	ENST00000223023	4.00001	3.00001	27.1034951094	32.92965069	0.0911036084	0.1475828111	81	423.00001	507.604963962	108.00001	616.719507366	0.8333252037	0.1751201457	0.2553191665	1.2149595673	0.210146225	-2.2407177147	25.9098785706
Andreev	ENST00000266971	0.00001	3.00001	24.664975165	22.5368025761	0.1331160439	4.05433207741E-007	129	260.00001	312.99662283	170.00001	285.990277652	0.8306799212	0.5944258364	0.6538461672	0.9137168161	0.7155895083	0.8388000244	13.781788238
Andreev	ENST00000441876	2.00001	1.00001	38.4239872128	30.9425682939	0.0323182611	0.0520510792	129	183.00001	319.604172708	72.00001	257.375006042	0.572583294	0.2797474825	0.3934426561	0.8052930094	0.4885708078	-0.1445684167	35.3394490781
Andreev	ENST00000263208	7.00001	9.00001	87.6765361288	72.3256849075	0.1244372592	0.0798390346	93	739.00001	2878.241557	237.00001	2374.30447336	0.2567539921	0.0998187101	0.3207036628	0.8249149442	0.388771794	-0.6721157014	5.5523672486
Andreev	ENST00000266529	39.00001	25.00001	55.2151072906	48.7947460427	0.5123504481	0.7063286103	102	67.00001	353.484951576	29.00001	312.382050646	0.1895413361	0.0928350715	0.4328359055	0.8837209314	0.4897879977	0.0570928487	5.0406022885
Andreev	ENST00000257536	1.00001	0.00001	2.147727711	2.673701737	3.74013296306E-006	0.4656130267	81	26.00001	30.8371275054	6.00001	38.3890755574	0.8431398156	0.1562947248	0.2307695266	1.2448979092	0.1853722501	-1.7025027454	8.9183954506
Andreev	ENST00000322886	1.00001	3.00001	37.6682929129	33.9888504042	0.0882645328	0.0265477919	132	366.00001	780.475614521	171.00001	704.238680723	0.4689448372	0.2428154185	0.4672131293	0.9023199029	0.5177910049	0.0421230827	11.9825833673
Andreev	ENST00000277570	1.00001	5.00001	15.1485151485	15.7128715842	0.3182110904	0.0660137307	99	221.00001	199.991003021	112.00001	207.441648086	1.1050497606	0.5399109149	0.5067873526	1.0372549012	0.4885851607	-0.143714269	6.5936221865
Sidrauski	ENST00000214869	27.00001	24.00001	4.7820896866	4.3522389403	5.5144054197	5.6460693483	18	370.00001	181.45373644	184.00001	165.143288679	2.0390873027	1.1141840003	0.4972973109	0.9101123621	0.5464130932	0.2796621296	3.3105022579
Sidrauski	ENST00000370128	91.00001	60.00001	18.3621302485	16.5585799527	3.6234997308	4.9558525492	18	2297.00001	1122.13018185	965.00001	1011.91321933	2.0469995791	0.9536390983	0.4201131936	0.9017788094	0.4658716631	-0.1474166177	2.5848849804
Sidrauski	ENST00000396354	87.00001	84.00001	5.795094747	4.2974232164	19.5465993853	15.0126984629	18	543.00001	324.203356122	211.00001	240.416954384	1.6748747345	0.8776419722	0.3885819634	0.7415622011	0.5240045444	0.2851191775	26.4961912242
Sidrauski	ENST00000396475	50.00001	30.00001	26.7567568347	19.4126819906	1.545382035	1.868687237	30	1128.00001	1446.64865286	423.00001	1049.57900629	0.7797332184	0.4030187413	0.3750000055	0.7255244763	0.5168674769	0.425568029	10.3829444056
Sidrauski	ENST00000245680	180.00001	111.00001	20.5621034157	17.1595648844	6.468696074	8.7539687143	27	1077.00001	1196.40979504	312.00001	998.432460496	0.9001932402	0.3124898502	0.2896935999	0.83452381	0.3471364105	-1.6237510045	7.2787878604
Sidrauski	ENST00000377843	567.00001	383.00001	69.8112544783	60.5545135639	6.3248796408	8.1218997458	21	2881.00001	3367.56194222	927.00001	2921.03439239	0.8555150757	0.3173533363	0.321763279	0.8674033151	0.3709500222	-0.8071720668	6.3202016952
Sidrauski	ENST00000379170	69.00001	47.00001	10.3396088905	9.1464083787	5.1386301654	6.6733675065	24	871.00001	464.851583036	306.00001	411.207276693	1.8737163469	0.7441502798	0.3513203289	0.8845990671	0.3971520455	-0.8377597711	4.7844733725
Sidrauski	ENST00000378757	150.00001	102.00001	1.99458	1.642276477	62.1089149304	75.2038073178	18	1217.00001	192.03373	391.00001	158.114729699	6.3374283778	2.4728879513	0.3212818462	0.82336957	0.3902036921	-0.8859560644	2.7255448486
Sidrauski	ENST00000395074	0.00001	0.00001	3.3109659084	3.8396074795	2.60443288885E-006	3.0202666765E-006	51	26.00001	75.3082441899	20.00001	87.3322485543	0.345247858	0.2290105927	0.769230858	1.1596638521	0.6633222693	0.5644575695	18.2456137441
Sidrauski	ENST00000296003	90.00001	54.00001	14.2806737129	14.1170810906	3.8251540565	6.3022243775	24	991.00001	1161.49479532	354.00001	1148.18926204	0.8532108917	0.3083115491	0.3572149409	0.9885444745	0.361354446	-1.4754266953	2.2025171499
Sidrauski	ENST00000245796	1.00001	1.00001	1.2143409021	0.9830378951	1.0172649548	0.82350022	60	17.00001	64.15767766	10.00001	51.9371687934	0.2649723403	0.1925405299	0.5882355363	0.8095238277	0.7266438815	0.3011309338	7.3076866864
Sidrauski	ENST00000610322	161.00001	110.00001	29.5095653217	24.5426088	4.4820015222	5.4558584054	24	1439.00001	1714.0139191	481.00001	1425.5165278	0.8395497808	0.3374215596	0.3342599073	0.8316831689	0.4019077454	-0.9171704557	4.1843847885
Sidrauski	ENST00000279146	36.00001	26.00001	37.4324327027	36.1621624324	0.7189838287	0.9617331122	33	2014.00001	1125.24161337	798.00001	1087.05651918	1.7898378322	0.7340924744	0.3962264181	0.9660649822	0.4101446853	-0.8045969292	2.4285714166
Sidrauski	ENST00000376573	45.00001	18.00001	16.3019464229	14.8658601526	1.2108286917	2.7604071828	30	1005.00001	662.945821199	396.00001	604.544979537	1.5159609999	0.6550381252	0.3940298568	0.9119070672	0.432094312	-0.4534280786	2.9048275461
Sidrauski	ENST00000248378	152.00001	81.00001	1.4333849311	0.7718229096	104.946366566	106.042701234	36	0.00001	13.2189943645	0.00001	7.117922389	7.56487197459E-007	1.40490433213E-006	1	0.538461716	1.8571422449	0.4148063699	6.1781794607
Sidrauski	ENST00000061240	1.00001	0.00001	0.3703041413	0.3622540519	2.76049362268E-005	2.7005099009	18	5.00001	62.5608274314	1.00001	61.2008095423	0.0799223764	0.0163398165	0.2000016	0.9782608711	0.2044460797	-2.0069346021	2.0059879999
Sidrauski	ENST00000300291	177.00001	135.00001	61.1679441411	56.045761995	2.4087460888	2.8936726988	21	3312.00001	1989.41456421	1176.00001	1822.82168774	1.664811382	0.6451536197	0.3550724657	0.9162603514	0.3875235518	-0.6022524071	3.493274764
Sidrauski	ENST00000290219	106.00001	58.00001	15.6578119045	17.040972643	3.4035621801	6.7697843509	24	396.00001	660.890144138	126.00001	719.271053638	0.5991918831	0.1751773679	0.3181818354	1.0883367834	0.292356043	-2.4871494407	3.8518738731
Sidrauski	ENST00000257897	0.00001	1.00001	0.3786192094	0.2728285635	3.6653420275	2.64117608218E-005	30	32.00001	31.6778071826	11.00001	22.8266564774	1.0101712475	0.4818931766	0.3437502051	0.7205882764	0.4770410737	-0.3155580183	2.999995
Sidrauski	ENST00000322776	384.00001	299.00001	68.289473797	58.8947369549	5.0768544943	5.6231215244	18	4444.00001	5288.64035961	1855.00001	4561.07018417	0.8402915887	0.4067027989	0.417416743	0.8624277459	0.4840019874	0.1978068984	2.7382222858
Sidrauski	ENST00000324288	0.00001	0.00001	1.3878012525	0.8059739433	1.24073490011E-005	7.2056427258E-006	57	0.00001	82.5863482195	0.00001	47.9625195716	1.21085387786E-007	2.08496135927E-007	1	0.5807560282	1.7218934484	0.2421740245	0
Sidrauski	ENST00000279263	43.00001	27.00001	5.6585367247	6.2996517073	4.28595282	7.5991395111	24	289.00001	296.130088595	108.00001	329.681772683	0.9759224784	0.3275886596	0.3737024438	1.1133004898	0.33567078	-1.5206147058	7.3106059815
Sidrauski	ENST00000368885	381.00001	256.00001	82.124781911	75.9677138482	3.3698527576	4.6392818481	21	796.00001	3926.34671613	362.00001	3631.98022398	0.2027329901	0.099670149	0.4547738762	0.9250278915	0.4916326096	0.337285681	8.7977772196
Sidrauski	ENST00000309422	13.00001	14.00001	9.7391307391	8.0956524783	1.7293244785	1.3348224136	42	80.00001	144.46377263	29.00001	120.085511761	0.5537721225	0.2414946614	0.3625000797	0.8312500053	0.4360903187	-0.3827673401	3.4459798562
Sidrauski	ENST00000370179	795.00001	517.00001	5.7027651843	4.5622121889	113.322219263	139.40605729	18	1758.00001	108.986179078	562.00001	87.1889440553	16.1304857631	6.4457714919	0.3196814601	0.8000000073	0.3996018215	-0.8653255359	2.2496347075
Sidrauski	ENST00000288723	34.00001	27.00001	10.501657558	8.5127072818	3.1717301096	3.2375850967	18	243.00001	386.227627967	85.00001	313.078456696	0.6291626813	0.2714974735	0.3497942654	0.8106060624	0.4315218966	-0.5843431741	8.6425779562
Sidrauski	ENST00000528838	132.00001	98.00001	48.211485	40.0476194538	2.4470870263	2.7379370289	87	878.00001	880.552295	264.00001	731.444451863	0.9971014953	0.3609296773	0.3006833793	0.8306655448	0.3619788748	-1.4909000733	12.9354632312
Sidrauski	ENST00000554659	86.00001	74.00001	8.2481779555	7.3376939338	10.0849136891	10.4265463795	24	73.00001	239.884508873	12.00001	213.404598576	0.3043131478	0.0562312625	0.1643836761	0.8896139212	0.184780917	-4.587274195	6.8494623223
Sidrauski	ENST00000389879	168.00001	116.00001	5.5998865863	2.9310443615	39.5763406119	30.0006093716	33	832.00001	295.606134342	306.00001	154.723614478	2.8145559694	1.9777201498	0.3677884691	0.5234113792	0.7026757227	0.7521504419	2.8018119982
Sidrauski	ENST00000333007	0.00001	0.00001	0.4074252144	0.2069461725	4.83217441587E-005	2.45443817596E-005	27	4.00001	29.6364118898	1.00001	15.0534178778	0.1349694428	0.0664307606	0.250001875	0.507936586	0.4921911157	-0.3766608079	3.068366129
Sidrauski	ENST00000397588	39.00001	18.00001	28.813186978	28.0714287363	0.6412217265	1.3535472501	36	781.00001	1307.79854228	266.00001	1274.13095986	0.5971867874	0.2087697563	0.3405889969	0.9742562931	0.3495887061	-1.4154597815	4.5099999248
Sidrauski	ENST00000252936	72.00001	42.00001	26.0447877066	24.9328185946	1.6845271561	2.7644690681	24	2719.00001	2938.72021289	940.00001	2813.25303142	0.9252326908	0.3341327636	0.3457153389	0.9573055029	0.3611337633	-1.3336651084	3.4530950641
Sidrauski	ENST00000455036	78.00001	71.00001	26.444851638	21.5771345255	3.2905208018	2.9495347929	24	1226.00001	2881.38695972	593.00001	2351.008616	0.4254895393	0.2522321722	0.4836867905	0.8159294981	0.5928046377	1.1204200511	3.0672726715
Sidrauski	ENST00000367619	59.00001	44.00001	12.4564740571	12.2405267271	3.5946173707	4.7364936281	18	2126.00001	1143.2275079	896.00001	1123.40834185	1.8596473539	0.7975728652	0.4214487327	0.9826638478	0.4288839298	-0.5724552085	6.3093922303
Sidrauski	ENST00000618527	130.00001	86.00001	72.137516328	63.2574773163	1.3595232319	1.8021137491	45	3917.00001	5726.11574053	1751.00001	5021.2379772	0.6840588258	0.3487187857	0.4470257865	0.8769012372	0.5097789437	0.3273369948	8.9071274023
Sidrauski	ENST00000382456	310.00001	220.00001	67.4720230416	68.1951220373	3.2260373386	4.5944970378	18	6753.00001	4876.72788762	2374.00001	4928.99187614	1.3847399662	0.4816400736	0.3515474613	1.0107170196	0.347819869	-1.1487417243	2.4198027019
Sidrauski	ENST00000295087	304.00001	150.00001	176.55445019	162.909125368	0.9207587952	1.7218484704	171	21.00001	556.507886855	11.00001	513.49718464	0.0377353322	0.0214217533	0.5238097506	0.9227132207	0.5676842369	0.8726914905	17.9325842277
Sidrauski	ENST00000559228	91.00001	71.00001	8.6875947694	7.5964494999	9.3464729807	10.4747070294	48	312.00001	337.549255104	99.00001	295.153714944	0.9243095794	0.3354184785	0.3173077142	0.8744019146	0.3628854293	-1.2682268365	5.9695290308
Sidrauski	ENST00000361523	92.00001	60.00001	56.0227275568	47.0170457386	1.2761331355	1.6421908395	60	669.00001	1262.37879428	198.00001	1059.45076398	0.5299518758	0.1868892984	0.2959641361	0.8392494937	0.3526533388	-1.5931704373	9.7766254292
Sidrauski	ENST00000373491	0.00001	0.00001	6.5424610919	5.4506066724	1.83465815843E-006	1.52847680095E-006	30	336.00001	330.830449211	92.00001	275.619010737	1.0156260127	0.3337941376	0.2738095454	0.833112585	0.3286585155	-1.5950418579	2.8047944245
Sidrauski	ENST00000619426	392.00001	361.00001	100.028460815	87.368693674	4.1319149322	3.9188847535	21	3178.00001	2938.93144395	1496.00001	2566.97542842	1.0813454041	0.5827870393	0.4707363138	0.8734383491	0.5389462397	0.7101444608	14.8419269574
Sidrauski	ENST00000302850	21.00001	16.00001	8.0944715802	5.7248465007	2.7948365075	2.5943645354	33	872.00001	1017.45054893	393.00001	719.595857123	0.8570441197	0.5461399008	0.4506880797	0.7072538885	0.6372366232	0.5253753248	6.8161431921
Sidrauski	ENST00000255175	377.00001	268.00001	39.8638473059	48.1025495075	5.5714304698	9.4571908002	45	3388.00001	1258.81171159	1187.00001	1518.97161889	2.6914271442	0.781449762	0.3503541932	1.2066710255	0.2903477301	-2.1902920459	5.251573128
Sidrauski	ENST00000396478	63.00001	56.00001	5.8207517636	3.9396081722	14.2146141323	10.8233459455	24	664.00001	425.399941388	285.00001	287.91969725	1.5608841126	0.9898593695	0.4292168761	0.6768211963	0.6341658305	0.661340814	2.1056909999
Sidrauski	ENST00000356860	33.00001	29.00001	13.8238794804	12.5831020111	2.3046789237	2.3871743129	51	899.00001	887.709907808	320.00001	808.032531105	1.0127182338	0.3960236719	0.3559510639	0.9102439029	0.391050204	-1.009806739	30.8384749394
Sidrauski	ENST00000307358	0.00001	0.00001	0.5808737426	0.5454546163	1.83333309524E-005	1.7215445055E-005	18	2.00001	43.9205090948	0.00001	41.2424295986	0.0455370405	2.42468741472E-007	0.000005	0.9390243977	5.32464865927E-006	-1.5430542028	9.3726933811
Sidrauski	ENST00000225740	0.00001	0.00001	0.5261384148	0.6745363912	0.000014825	1.9006405383E-005	24	18.00001	29.8364326082	13.00001	38.2518345194	0.603289617	0.3398532427	0.7222223765	1.2820512097	0.5633334855	-0.0992703597	25.6190458763
Sidrauski	ENST00000354831	285.00001	192.00001	54.5476252298	41.9453145751	4.5773887249	5.2247922581	27	7576.00001	7392.21335984	2614.00001	5684.36689001	1.024862195	0.4598577222	0.3450369597	0.7689668322	0.4487020054	-0.3859916777	2.8798751838
Sidrauski	ENST00000543227	24.00001	33.00001	3.7896835378	2.6181094842	12.6045187184	6.3329852641	54	31.00001	148.569630545	12.00001	102.639588481	0.2086564386	0.1169140502	0.3870969719	0.6908517448	0.56031844	0.1014970824	11.6327042562
Sidrauski	ENST00000399022	15.00001	7.00001	27.5110410568	28.135646735	0.2487950629	0.5452360007	21	1256.00001	1228.82650054	421.00001	1256.72555416	1.0221133817	0.3349975725	0.3351910881	1.0227038183	0.3277499136	-1.3968307759	5.8173301654
Sidrauski	ENST00000357365	32.00001	21.00001	23.2291667708	19.0937501042	1.0998368516	1.3775788997	24	285.00001	1265.02170706	97.00001	1039.81380776	0.2252925846	0.0932859415	0.3403509003	0.821973095	0.4140657431	-0.7573051996	2.5864406604
Sidrauski	ENST00000233468	228.00001	185.00001	155.754545727	134.972727545	1.3706473401	1.4638417706	21	2216.00001	2796.16493996	993.00001	2423.08182308	0.7925140532	0.4098086992	0.4481046956	0.8665732799	0.5170995991	0.5366936496	1.9048727725
Sidrauski	ENST00000453396	19.00001	24.00001	6.2811569791	4.8903294616	4.9076468546	3.0249220109	45	32.00001	23.3100714556	14.00001	18.148556002	1.3727975936	0.7714117861	0.4375001758	0.7785714444	0.5619268199	0.5184042966	6.2085426356
Sidrauski	ENST00000349703	177.00001	145.00001	28.8009879008	25.8707553427	5.6047845561	6.1456228727	21	2895.00001	4721.99054012	1007.00001	4241.57193547	0.6130889051	0.2374119844	0.3478411076	0.8982593039	0.3872390813	-1.0964883713	3.0555336626
Sidrauski	ENST00000361114	110.00001	92.00001	29.1754092614	26.9886698573	3.4088382453	3.7702987819	27	2671.00001	1545.21612014	1144.00001	1429.39992207	1.7285607982	0.8003358559	0.4283040081	0.925048544	0.4630070615	-0.2346322615	3.274670455
Sidrauski	ENST00000258796	48.00001	25.00001	9.7016529731	5.32623975	4.6937447756	4.9476115187	39	957.00001	390.802482585	271.00001	214.55186275	2.4488073967	1.2630979127	0.283176601	0.549003326	0.5158012486	0.028335339	4.7559561985
Sidrauski	ENST00000396319	0.00001	0.00001	62.4170125622	55.3195021888	1.80768076435E-007	1.60212730304E-007	33	4042.00001	4480.78493212	1489.00001	3971.26971774	0.9020740944	0.3749430575	0.3683819907	0.8862888485	0.4156455216	-0.7148647471	5.0577900946
Sidrauski	ENST00000330288	29.00001	16.00001	5.4726563672	5.5078126172	2.9049662928	5.2990738052	18	289.00001	76.3131526758	129.00001	76.8033870508	3.7870275289	1.6796135555	0.4463668012	1.0064239827	0.4435176514	-0.2979473331	5.1082250345
Sidrauski	ENST00000377838	18.00001	20.00001	5.4035240962	5.0100065847	3.9920127173	3.3311612347	27	330.00001	746.686977879	144.00001	692.30868769	0.4419522769	0.2079997154	0.4363636534	0.9271739138	0.4706384066	-0.3046672059	6.5994063324
Sidrauski	ENST00000602728	322.00001	198.00001	126.923077284	127.067308053	1.5582293592	2.5369697686	30	1801.00001	1303.07692678	802.00001	1304.55769601	1.382113345	0.614767758	0.4453081652	1.0011363636	0.4448027076	-0.0579511901	14.7501675356
Sidrauski	ENST00000486685	96.00001	59.00001	14.0434785346	13.0579712882	4.5183136567	6.8359138915	51	400.00001	234.333337901	120.00001	217.888893457	1.7069701374	0.550739453	0.3000000175	0.9298245628	0.3226415278	-1.7696190894	11.136777777
Sidrauski	ENST00000344843	492.00001	323.00001	157.073509431	125.409154369	2.5755696355	3.1322914461	30	5259.00001	2350.86685782	2028.00001	1876.95701039	2.2370471524	1.0804722744	0.3856246446	0.7984105966	0.482990389	0.2217021231	2.39367112
Sidrauski	ENST00000261318	21.00001	12.00001	7.8237744181	7.0516421002	1.701732707	2.6841277468	21	81.00001	229.869943619	40.00001	207.183960753	0.3523732104	0.1930651864	0.493827223	0.9013094861	0.5478997288	0.7907350043	4.3597560533
Sidrauski	ENST00000335181	714.00001	806.00001	412.998274517	384.326143369	2.0971771604	1.7288208064	33	24900.00001	19961.5832683	10580.00001	18575.7635962	1.2473960445	0.5695593592	0.4248995986	0.9305756636	0.4565986574	0.0453934088	4.3057304271
Sidrauski	ENST00000334133	61.00001	29.00001	10.2313886318	5.6740445674	5.1109943984	5.9620460326	90	600.00001	197.352118498	236.00001	109.446015211	3.0402511742	2.1563143212	0.3933333434	0.5545722845	0.7092553206	0.7481398963	5.620303193
Sidrauski	ENST00000310931	1322.00001	1076.00001	239.301684625	240.202144043	4.4795603898	5.5244074528	42	15235.00001	21685.2907543	4898.00001	21766.8895292	0.7025499535	0.2250206674	0.3214965544	1.0037628629	0.320291342	-1.492920974	3.3876701924
Sidrauski	ENST00000378526	92.00001	72.00001	9.0192857464	7.5632143179	9.5197632877	10.2003653711	27	2396.00001	1011.8302417	1088.00001	848.480598844	2.3679861614	1.2822921484	0.4540901525	0.8385602287	0.5415116732	0.4240617464	5.9078590386
Sidrauski	ENST00000256367	22.00001	8.00001	2.173663226	1.9120186027	4.18406494	10.1211676845	105	47.00001	13.8286384282	28.00001	12.164080253	3.3987445868	2.3018600188	0.5957447669	0.8796296408	0.6772677264	0.697371202	4.2334628703
Sidrauski	ENST00000221232	40.00001	28.00001	9.0199860484	5.2205470582	5.3634245009	4.4345977683	21	2340.00001	971.15183121	890.00001	562.078899933	2.40950996	1.5834076143	0.380341883	0.5787755136	0.6571492298	0.9975196461	4.3951715096
Sidrauski	ENST00000403825	325.00001	206.00001	225.030131699	194.688210301	1.05810213	1.4442510767	159	988.00001	1917.7096129	1016.00001	1659.1353771	0.5151979233	0.6123671546	1.0283400807	0.8651650729	1.1886056348	4.5115825344	6.3345337115
Sidrauski	ENST00000362074	32.00001	17.00001	0.1152615688	0.0864462006	196.654218162	277.629485031	18	0.00001	4.5464285486	0.00001	3.4098223586	2.19952868349E-006	2.93270409668E-006	1	0.7500002083	1.333332963	0.1983791838	35.9293666941
Sidrauski	ENST00000228506	323.00001	195.00001	84.2281920435	72.0941745367	2.7047956545	3.8348206481	48	1830.00001	1540.6740128	776.00001	1318.72260923	1.1877918332	0.5884482488	0.424043719	0.8559387633	0.4954136174	0.3675351327	4.966804971
Sidrauski	ENST00000280557	378.00001	254.00001	55.263272026	45.6251355146	5.5671069715	6.8399860548	24	953.00001	1372.37125531	437.00001	1133.02419861	0.6944185156	0.3856934482	0.4585519469	0.8255959852	0.5554193033	0.7864451819	4.1982916327
Sidrauski	ENST00000334295	77.00001	55.00001	51.6387098933	47.1483873127	1.1665300371	1.4911296227	87	1418.00001	535.3806474	494.00001	488.82580869	2.648582867	1.0105849593	0.3483780018	0.9130434786	0.3815568589	-1.075744797	11.3465630965
Sidrauski	ENST00000396203	45.00001	16.00001	591.239083788	686.872271561	0.0232940106	0.0761113587	75	2180.00001	5100.42249615	584.00001	5925.41812933	0.4274155742	0.0985584472	0.2678899116	1.1617504499	0.2305916143	-2.651969703	5.226762449
Sidrauski	ENST00000373279	95.00001	77.00001	6.6422537747	6.0591551831	12.7080438895	14.3023758536	27	375.00001	89.7934306573	169.00001	81.9108015493	4.1762521741	2.0632200736	0.4506666813	0.9122137438	0.4940362764	-0.0042527637	2.2982455636
Sidrauski	ENST00000369046	73.00001	74.00001	7.0886507988	6.4968339455	11.3901649051	10.2981529309	18	544.00001	624.588898164	211.00001	572.443257638	0.8709729097	0.3685955021	0.3878676583	0.9165120599	0.4231997322	-0.5946535101	2.6382488175
Sidrauski	ENST00000274605	13.00001	4.00001	0.4440789918	0.3108553076	12.8677551988	29.2740936652	27	43.00001	26.8750026875	22.00001	18.8125026875	1.6000002121	1.1694355805	0.5116280206	0.70000003	0.7308971409	0.5181819663	7.419847045
Sidrauski	ENST00000370966	120.00001	98.00001	25.2219799847	23.2804187113	4.2095467103	4.7577553417	21	275.00001	1901.25687218	96.00001	1754.90013428	0.1446411655	0.0547039732	0.3490909328	0.9230210604	0.378204732	-1.0119654555	2.393870588
Sidrauski	ENST00000528372	24.00001	27.00001	5.4650603029	4.9012048812	5.5088515282	4.3915361716	18	279.00001	625.445790224	157.00001	560.915669742	0.4460818417	0.2798994902	0.56272403	0.896825398	0.6274621919	0.7341683956	2.92792784
Sidrauski	ENST00000333479	112.00001	89.00001	20.9496774452	17.3677419613	5.1244433616	5.3461448413	18	3316.00001	7715.30065467	1502.00001	6396.15341452	0.4297953066	0.2348286404	0.4529553696	0.8290219268	0.5463732079	0.4479642789	18.7760413407
Sidrauski	ENST00000303319	26.00001	14.00001	187.086351309	172.479108969	0.0811693085	0.1389733127	48	2429.00001	3468.89276386	985.00001	3198.05014547	0.7002234359	0.3080001767	0.405516676	0.9219224586	0.4398598518	-0.1687559889	3.2431192611
Sidrauski	ENST00000409302	22.00001	12.00001	10.8575138083	10.1735759845	1.1795272398	2.0262474806	66	104.00001	69.915808614	44.00001	65.5116635363	1.4875034997	0.6716362801	0.4230769786	0.937007879	0.451519126	-0.4849144755	23.0156706854
Sidrauski	ENST00000367837	207.00001	174.00001	67.5751780692	60.7542929652	2.8639953081	3.063255117	51	3134.00001	2721.55717165	916.00001	2446.84936766	1.1515466376	0.3743589704	0.2922782409	0.8990622696	0.3250923221	-1.856297156	6.5072886108
Sidrauski	ENST00000282096	32.00001	18.00001	35.834101501	28.1909151942	0.638503925	0.8930043913	72	523.00001	1661.30876125	234.00001	1306.96215164	0.3148120459	0.1790411526	0.4474187486	0.7867063499	0.5687239574	0.6225063567	13.7950905678
Sidrauski	ENST00000281543	69.00001	73.00001	24.7815240121	19.3668240796	3.769333046	2.7843327943	33	1319.00001	1508.66914365	543.00001	1179.02877503	0.8742804979	0.4605485646	0.4116755162	0.7815025448	0.5267743771	0.4125901579	4.8205127896
Sidrauski	ENST00000291672	0.00001	0.00001	5.3669128528	4.767694442	2.09744985162E-006	1.86326856319E-006	30	5.00001	182.832831185	2.00001	162.419457325	0.0273474407	0.0123138572	0.4000012	0.8883495173	0.4502745735	-0.5129416543	4.6155641664
Sidrauski	ENST00000308025	215.00001	152.00001	42.9679803695	40.4556650985	3.7571996315	5.0037262201	24	1928.00001	4407.7986529	708.00001	4150.07697802	0.4374065518	0.1705992476	0.3672199203	0.9415305246	0.390024445	-1.0313422386	3.8097686235
Sidrauski	ENST00000432176	68.00001	26.00001	9.970554775	8.7657281832	2.9660981332	6.8200828875	27	838.00001	577.922897143	285.00001	508.087578026	1.4500204338	0.5609269392	0.3400954733	0.8791615292	0.3868407135	-1.1644544134	5.1037310164
Sidrauski	ENST00000510164	318.00001	208.00001	56.8165733146	62.3411107241	3.33648226	5.596958624	63	128.00001	826.996789356	68.00001	907.409500539	0.1547769129	0.0749386137	0.5312500366	1.0972346111	0.4841717817	-0.0089286958	14.7544483723
Sidrauski	ENST00000345254	118.00001	84.00001	22.9821792127	21.6523799797	3.8794816126	5.1344134474	45	3736.00001	1677.18836744	1880.00001	1580.14257452	2.2275375161	1.1897660631	0.5032119928	0.9421378094	0.534117183	0.3123717401	12.2636009966
Sidrauski	ENST00000378863	204.00001	149.00001	48.6859527059	48.6654878247	3.0617182044	4.1901205309	81	656.00001	543.960335788	281.00001	543.731684955	1.2059703012	0.5167990348	0.4283536673	0.9995796553	0.4285337992	-0.5771407033	11.7633821825
Sidrauski	ENST00000449549	5.00001	2.00001	0.6201577888	0.3332191532	6.0020859562	8.0624803721	27	54.00001	27.7463188481	15.00001	14.9084717449	1.9462044784	1.006140016	0.2777779115	0.5373135019	0.5169754911	-0.2484086015	8.7189727715
Sidrauski	ENST00000315480	63.00001	47.00001	10.0349933782	8.4629879946	5.5535952585	6.278032045	48	640.00001	573.667121454	297.00001	483.800813692	1.1156295804	0.6138890254	0.4640625084	0.8433476412	0.5502624134	0.1824624421	7.2257550521
Sidrauski	ENST00000374492	13.00001	16.00001	15.1453884419	15.7363212194	1.0167566979	0.8583477439	42	211.00001	626.009388932	87.00001	650.434610401	0.3370556636	0.1337567353	0.4123223027	1.0390173405	0.3968387116	-0.9160478159	3.6294846469
Sidrauski	ENST00000246151	39.00001	60.00001	52.7011854273	44.0174673986	1.3630954606	0.7400214945	24	1963.00001	1394.3855311	912.00001	1164.62882492	1.407788568	0.7830821207	0.4645950104	0.8352272732	0.556249808	0.8647058358	6.3554454816
Sidrauski	ENST00000451237	2.00001	0.00001	5.4510044982	3.6340033176	2.75178615044E-006	0.3669066868	162	16.00001	38.2243278394	10.00001	25.4828874616	0.4185818536	0.3924206005	0.6250002344	0.6666667251	0.9375002693	0.7852987164	8.5287346519
Sidrauski	ENST00000281382	34.00001	17.00001	7.1239070991	7.2813415015	2.3347359819	4.772663305	54	83.00001	86.9380514504	28.00001	88.8593342493	0.9547029018	0.3151048816	0.3373494774	1.0220994463	0.3300554351	-1.5423028175	4.4409825977
Sidrauski	ENST00000436390	188.00001	91.00001	197.584615846	143.630769692	0.6335690479	0.951491133	105	781.00001	2498.97495089	407.00001	1816.58725858	0.3125281467	0.224046496	0.5211267667	0.7269329602	0.716884218	1.9784739836	4.8499577295
Sidrauski	ENST00000310473	779.00001	408.00001	25.4779938997	10.2962617653	39.626033147	30.5754060962	111	307.00001	213.234741737	344.00001	86.1732178372	1.4397279144	3.9919596672	1.1205211687	0.4041237236	2.7727181138	4.9710060929	8.4941921809
Sidrauski	ENST00000619594	211.00001	171.00001	24.2514554249	22.5890572875	7.5700374665	8.7005091572	21	577.00001	348.759025634	311.00001	324.852157183	1.6544374986	0.9573586111	0.5389948087	0.9314516136	0.5786610929	1.0435800678	3.2438642241
Sidrauski	ENST00000317269	99.00001	60.00001	10.4000000541	9.4810811351	6.328393265	9.5192316813	18	672.00001	1217.95556189	325.00001	1110.33994627	0.5517442763	0.2927031591	0.4836309601	0.9116424121	0.5305051121	0.3372442761	2.8252212264
Sidrauski	ENST00000376810	61.00001	25.00001	8.1039495913	7.7410861794	3.2295222428	7.5271951426	21	750.00001	392.076799276	275.00001	374.521121821	1.9128905648	0.7342710303	0.3666666751	0.9552238809	0.3838541754	-1.1694270157	7.5150501044
Sidrauski	ENST00000269468	37.00001	23.00001	8.1853329794	6.6333231605	3.4673435085	4.5202815931	18	1351.00001	826.263890203	527.00001	669.597121255	1.6350708606	0.7870404356	0.3900814257	0.8103913643	0.4813494354	-0.1098495109	2.6838638564
Sidrauski	ENST00000277165	81.00001	59.00001	78.2796014947	61.6441970399	0.9571056617	1.0347524573	45	2511.00001	5837.91872481	811.00001	4597.28722813	0.4301190421	0.1764083838	0.3229788956	0.787487364	0.4101385118	-0.7812101869	3.6166666393
Sidrauski	ENST00000336308	122.00001	64.00001	6.5797374343	5.84099447	10.9570399919	18.5417748379	21	404.00001	418.909949986	128.00001	371.876647922	0.9644077683	0.3442001823	0.3168317001	0.8877245526	0.3569031623	-1.1254482663	11.5457141208
Sidrauski	ENST00000394264	52.00001	46.00001	4.9525692161	4.2470356192	10.8310864622	10.4996028791	21	322.00001	203.527011118	108.00001	174.532939971	1.582099635	0.6187944237	0.3354037473	0.8575419008	0.3911222846	-0.9469870823	3.5119047271
Sidrauski	ENST00000256015	0.00001	0.00001	31.7833335	28.6166668333	3.49446707342E-007	3.14630307737E-007	78	949.00001	209.851496827	396.00001	188.943377169	4.5222456087	2.0958660522	0.4172813549	0.9003670692	0.4634569268	-0.029448206	16.8693360303
Sidrauski	ENST00000313093	1.00001	2.00001	2.486777538	2.5457524971	0.7856262548	0.402130864	42	81.00001	201.902652492	25.00001	206.690857501	0.4011834862	0.1209536324	0.3086420607	1.0237154141	0.3014920518	-1.3586007935	59.2558001731
Sidrauski	ENST00000224337	2.00001	2.00001	0.0739912164	0.0554934585	36.0404641075	27.0303706059	33	20.00001	3.0717565583	4.00001	2.3038193386	6.5109358832	1.7362515945	0.2000004	0.750000625	0.2666669778	-1.0062736946	3.3333222223
Sidrauski	ENST00000261593	0.00001	0.00001	53.8857144286	48.957143	2.04260285368E-007	1.85577942244E-007	51	650.00001	778.701402625	260.00001	707.478713549	0.8347230502	0.3675022372	0.4000000092	0.9085365856	0.4402684664	-0.2789514326	4.808149365
Sidrauski	ENST00000618655	43.00001	23.00001	6.7855468325	4.9413422337	4.6546077791	6.3369999591	30	397.00001	281.374008653	156.00001	204.90099129	1.4109334828	0.761343364	0.3929471186	0.7282157733	0.5396025917	0.1164517291	2.5426573249
Sidrauski	ENST00000356998	1.00001	2.00001	0.2931039368	0.1954027874	10.2353197058	3.4117931372	102	0.00001	2.7729931274	2.00001	1.8486636255	3.60621160623E-006	1.0818679896	200001	0.6666672222	300001.249999	1.9144709131	25.7288091985
Sidrauski	ENST00000299314	43.00001	26.00001	12.8188037607	10.5539379477	2.4635363718	3.3544479503	24	591.00001	2013.62042408	187.00001	1657.84775262	0.2935011996	0.1127968535	0.3164128711	0.8233169136	0.3843147953	-1.0236510899	1.6377816149
Sidrauski	ENST00000346246	77.00001	31.00001	2.7309763943	2.313743896	13.3982028231	28.1950478082	18	47.00001	255.194571955	16.00001	216.206512952	0.1841732355	0.0740033673	0.3404256723	0.8472222246	0.4018139071	-0.8464130157	3.8327813935
Sidrauski	ENST00000316763	55.00001	37.00001	10.5650155882	9.8498453096	3.7564051858	5.205861699	21	535.00001	716.408676078	210.00001	667.913320041	0.746780473	0.3144120707	0.3925233758	0.932307693	0.4210234226	-0.6533656272	2.3188405517
Sidrauski	ENST00000381334	102.00001	51.00001	25.1390042583	26.2717843413	1.9412465228	4.0574403406	21	1590.00001	1165.97095941	515.00001	1218.5103785	1.363670336	0.4226472085	0.3238993753	1.0450606584	0.3099335648	-2.0826003142	3.7463751352
Sidrauski	ENST00000375040	10.00001	5.00001	0.6219519106	0.6219519106	8.0392228322	16.0784295861	102	6.00001	2.9390276558	4.00001	2.9390276558	2.0414949101	1.3609977409	0.6666672222	1	0.6666672222	0.0482279403	8.2967862326
Sidrauski	ENST00000274963	1.00001	0.00001	0.1595537787	0.0797770223	0.0001253494	6.2675419409	81	1.00001	3.8745960834	1.00001	1.9373012705	0.2580939996	0.5161871389	1	0.5000008333	1.9999966667	0.4792784472	25.9997400026
Sidrauski	ENST00000229238	749.00001	520.00001	150.461912723	124.910859238	4.1629688017	4.978004044	30	3312.00001	1935.94327703	1116.00001	1607.18638887	1.7107939315	0.6943811979	0.3369565237	0.8301825823	0.4058824299	-0.4194939612	3.9942014176
Sidrauski	ENST00000331373	347.00001	193.00001	175.528150633	118.631099694	1.6268921935	1.976890936	93	1327.00001	1985.54424157	717.00001	1341.93459009	0.668330618	0.5343032479	0.5403165069	0.6758522736	0.7994594794	2.5387988805	30.0907715169
Sidrauski	ENST00000439853	80.00001	49.00001	19.2270538708	15.2063153104	3.222346045	4.1608043821	63	302.00001	735.81629972	117.00001	581.943273229	0.4104285405	0.2010505411	0.3874172388	0.7908811934	0.4898551667	-0.0680459444	12.0027528424
Sidrauski	ENST00000262630	0.00001	0.00001	0.6061227245	0.5234696633	1.91033037858E-005	1.64983089991E-005	54	1.00001	16.4214360357	0.00001	14.1821503214	0.060896623	7.05111691341E-007	9.999900001E-006	0.8636364256	1.15788307491E-005	-1.4334517497	1700000
Sidrauski	ENST00000369563	126.00001	83.00001	28.7626905457	22.0050763325	3.7718573999	4.3806753683	75	544.00001	612.837059893	239.00001	468.854826391	0.8876747925	0.5097526922	0.4393382456	0.7650562557	0.5742561313	0.6672849018	16.3600525087
Sidrauski	ENST00000400334	57.00001	32.00001	20.9784561423	21.4261670938	1.4935013743	2.7170736308	57	465.00001	1028.68043715	171.00001	1050.63398293	0.4520354361	0.1627588797	0.3677419491	1.0213414633	0.360057789	-1.5148469154	8.5455240683
Sidrauski	ENST00000360845	138.00001	121.00001	89.8173304496	54.5353632365	2.2187440006	1.536451922	51	3416.00001	3078.44497306	1504.00001	1869.17284191	1.1096511518	0.8046339944	0.4402810321	0.6071808521	0.7251233805	2.0099018646	3.3434894989
Sidrauski	ENST00000328557	6.00001	1.00001	0.9114669384	0.6236354251	1.6035169904	6.5828059663	123	24.00001	15.3986040484	17.00001	10.5358895398	1.5585834875	1.6135334312	0.7083334549	0.6842106925	1.0352563364	0.5220666577	13.5294097751
Sidrauski	ENST00000394987	123.00001	104.00001	24.7693003883	13.6198647223	7.6359062384	4.9658249556	72	1583.00001	1081.24876556	758.00001	594.544928088	1.4640479235	1.2749246931	0.4788376533	0.5498687694	0.8708216942	1.7314524957	9.0349281864
Sidrauski	ENST00000305352	19.00001	11.00001	0.6270197903	0.3722930801	29.5466410419	30.3020898124	57	173.00001	12.6283985837	52.00001	7.4981132623	13.699283314	6.9350792901	0.3005780751	0.593750127	0.5062366498	-0.337345932	8.028985378
Sidrauski	ENST00000398013	294.00001	201.00001	108.9500005	100.9000005	1.992071447	2.6984856232	114	701.00001	1034.06930299	235.00001	957.664917026	0.6779042836	0.2453885548	0.3352353875	0.9261128962	0.3619811244	-1.2910820916	3.326605502
Sidrauski	ENST00000326974	503.00001	231.00001	212.599267119	211.81980143	1.0905496485	2.3659536405	93	1666.00001	2624.34364142	550.00001	2614.72184991	0.6348254031	0.2103474257	0.3301320568	0.9963336389	0.3313468942	-1.7579393993	19.2486701945
Sidrauski	ENST00000261439	8.00001	5.00001	13.9989475053	12.4936843474	0.4002030035	0.571472248	78	889.00001	629.234742993	269.00001	561.57509387	1.4128272793	0.4790098652	0.3025871844	0.8924731193	0.3390434713	-1.4516469375	11.3461529734
Sidrauski	ENST00000286835	137.00001	80.00001	31.3343669378	16.6663488123	4.8000921438	4.3721965174	57	3523.00001	1892.70570819	1489.00001	1006.70594668	1.861356467	1.4790813692	0.4226511512	0.5318872038	0.7946255301	1.6515592552	12.7810650131
Sidrauski	ENST00000380338	89.00001	49.00001	26.9787360602	25.9598347017	1.8875316643	3.2988947222	60	937.00001	767.095395313	452.00001	738.124633352	1.2214908546	0.6123627225	0.4823906138	0.9622331693	0.5013240338	0.1488402535	14.596566367
Sidrauski	ENST00000612662	892.00001	448.00001	254.461423831	196.335718148	2.2818059507	3.5054429727	312	55.00001	794.376367986	86.00001	612.919838065	0.0692367148	0.1403120027	1.5636362612	0.7715736051	2.0265548883	6.8856858817	10.797181221
Sidrauski	ENST00000398844	0.00001	0.00001	20.8809335625	16.8326719336	5.94082748088E-007	4.78905790782E-007	51	2658.00001	1343.34005919	1029.00001	1082.9018944	1.9786501503	0.9502245913	0.3871331852	0.8061264063	0.4802388088	-0.1192258571	26.6330704467
Sidrauski	ENST00000368875	68.00001	44.00001	38.1872960834	34.8958072558	1.2608967512	1.7806971683	30	2136.00001	3164.45393544	900.00001	2891.69922793	0.6749979787	0.3112356919	0.4213483173	0.9138067063	0.4610912947	-0.1079784463	4.7257360702
Sidrauski	ENST00000260952	850.00001	434.00001	766.814695065	649.108164453	0.6686096921	1.108481639	291	1013.00001	5088.3820487	401.00001	4307.31225278	0.1990809653	0.0930975018	0.3958539053	0.8464993807	0.4676363791	-0.0760978139	9.102088708
Sidrauski	ENST00000377223	416.00001	293.00001	80.9644897326	66.0499785533	4.4360348999	5.1380551075	108	804.00001	428.811927102	343.00001	349.820256782	1.8749478715	0.9805035682	0.4266169226	0.8157894748	0.5229497753	0.4508722915	10.5709023819
Sidrauski	ENST00000282570	84.00001	40.00001	20.4194704152	17.3163923908	2.3099505427	4.1137212813	51	124.00001	619.390602594	51.00001	525.263902522	0.2001967894	0.0970940698	0.4112903701	0.848033374	0.4849931414	-0.0334625658	5.2102563912
Sidrauski	ENST00000373087	17.00001	8.00001	3.8628914754	3.4336813413	2.3298638414	4.4008510486	72	104.00001	96.5186356148	42.00001	85.7943435134	1.0775122269	0.4895428799	0.4038462112	0.8888888966	0.4543269836	-0.4454200787	9.4668505672
Sidrauski	ENST00000298875	225.00001	147.00001	36.521979328	30.0966628723	4.8842627711	6.1606740418	54	5236.00001	1588.02976782	1627.00001	1308.64748933	3.2971674185	1.243268354	0.3107333856	0.8240698732	0.3770716485	-1.0264705488	2.8383215879
Sidrauski	ENST00000370267	427.00001	325.00001	311.147541803	286.229509016	1.1354524945	1.3723393331	135	2163.00001	1221.54220115	712.00001	1123.71585021	1.7707124715	0.6336121448	0.3291724488	0.9199157009	0.3578289276	-1.0303178956	7.6916221918
Sidrauski	ENST00000392038	312.00001	240.00001	47.9547171509	46.9018869623	5.1170651235	6.5061380514	90	2303.00001	769.939625368	687.00001	753.035851783	2.9911436353	0.9123071742	0.2983065597	0.9780453259	0.3050027967	-2.1283899395	6.6449382607
Sidrauski	ENST00000494664	480.00001	286.00001	100.992481491	78.3095240977	3.6521740273	4.7528291504	69	1749.00001	1254.3558933	818.00001	972.626987707	1.3943411271	0.8410212963	0.4676958292	0.775399544	0.6031675319	1.2440588731	8.3440603086
Sidrauski	ENST00000342665	107.00001	68.00001	22.6555076955	12.0285098553	5.6532364206	4.7229138026	63	514.00001	340.551837898	184.00001	180.809505285	1.5093150375	1.0176456692	0.3579766662	0.5309309337	0.6742433779	1.3230990716	6.2285505432
Sidrauski	ENST00000316495	82.00001	56.00001	66.5581416279	57.5581416279	0.9729294313	1.232005702	180	24.00001	161.588377174	19.00001	139.738377174	0.1485255958	0.1359684461	0.7916667535	0.8647798785	0.9154546413	2.6846129386	4.677247794
Sidrauski	ENST00000265070	204.00001	145.00001	62.9900774311	57.056229581	2.541352821	3.2386054807	69	1834.00001	817.958106931	764.00001	740.904082675	2.2421686324	1.031172628	0.4165757938	0.9057971018	0.4598996762	-0.1713341582	7.0189057029
Sidrauski	ENST00000253727	28.00001	8.00001	15.9549552703	14.8828831982	0.5375309269	1.7549413035	63	293.00001	349.996002913	159.00001	326.478485395	0.8371524462	0.487015277	0.5426621317	0.9328063254	0.5817521996	0.4632422071	6.7191976837
Sidrauski	ENST00000309534	299.00001	178.00001	143.818465135	140.139710963	1.2701611041	2.0790098804	78	1161.00001	927.444717471	402.00001	903.721469417	1.251826646	0.4448273319	0.3462532356	0.9744208495	0.3553425974	-0.9445540587	5.1152629123
Sidrauski	ENST00000261558	179.00001	93.00001	34.5001278981	32.9946324563	2.8186405811	5.1883868526	114	529.00001	445.475335667	270.00001	426.035955927	1.1874956202	0.6337493497	0.5103969847	0.9563626127	0.5336856312	0.549288275	5.3906215804
Sidrauski	ENST00000369842	263.00001	193.00001	117.380711269	124.446701117	1.5508648142	2.2405726389	84	3302.00001	1067.60551678	1382.00001	1131.87237682	3.0929027231	1.2209857209	0.4185342234	1.0601971974	0.3947701658	-0.9108729576	4.3912355898
Sidrauski	ENST00000366647	190.00001	124.00001	230.372304631	207.08059067	0.5988007355	0.824751961	114	1287.00001	4126.49338646	479.00001	3709.28566796	0.311887089	0.1291353789	0.3721833771	0.8988953381	0.4140452857	-0.6800020304	6.4197508127
Sidrauski	ENST00000334351	825.00001	572.00001	384.891556999	362.525662959	1.5778193613	2.1434609178	171	18.00001	943.096856039	25.00001	888.293875906	0.0190860672	0.0281438505	1.3888886728	0.941890401	1.474575674	4.6741589101	3.0495492404
Sidrauski	ENST00000507416	380.00001	267.00001	130.797946695	103.982878202	2.5677305208	2.9052444599	87	252.00001	336.767127123	108.00001	267.726031233	0.7482915929	0.4033974937	0.4285714512	0.7949886128	0.5390913082	0.7012233027	26.7502954034
Sidrauski	ENST00000301998	23.00001	21.00001	10.6775245494	10.8327905646	1.9385595867	2.1540582645	33	216.00001	386.008690528	113.00001	391.621792229	0.5595729197	0.2885437232	0.5231481702	1.0145413869	0.5156499055	0.1693380553	2.2392637693
Sidrauski	ENST00000329565	13.00001	7.00001	8.2898551902	7.7246377989	0.9061926504	1.5681830022	39	21.00001	56.5410636051	9.00001	52.6859911413	0.3714116548	0.1708235872	0.4285717007	0.9318181828	0.4599306051	-0.1709811605	4.4701986015
Sidrauski	ENST00000368494	37.00001	27.00001	56.2981181138	35.3122327417	0.7646078399	0.6572157514	30	34.00001	1653.28806861	14.00001	1037.00256818	0.0205650852	0.0135004584	0.4117648789	0.6272364677	0.6564747111	1.5027308014	6.2747662379
Sidrauski	ENST00000331495	0.00001	0.00001	0.1580103292	0.131675289	7.59443938148E-005	0.000063287	36	27.00001	14.4930585272	7.00001	12.0775501146	1.8629614963	0.57958857	0.2592595336	0.8333334259	0.3111114058	-0.8455532708	5.7037015912
Sidrauski	ENST00000340258	4.00001	2.00001	0.680582373	0.7613294205	2.6269968639	5.8773341168	42	38.00001	15.6371902362	20.00001	17.4924497803	2.4301047328	1.1433510029	0.5263159141	1.1186440477	0.4704945378	-0.3656473711	3.1217104236
Sidrauski	ENST00000244519	8.00001	1.00001	0.5736177282	0.5736177282	1.7433387269	13.9465877831	42	31.00001	23.955368934	12.00001	23.955368934	1.2940735785	0.5009319636	0.3870969719	1	0.3870969719	-0.6217210061	3.5321542841
Sidrauski	ENST00000264414	53.00001	38.00001	44.4325768402	33.8584780418	1.122318905	1.1928187328	48	5891.00001	2134.6150457	2362.00001	1626.61771593	2.7597481906	1.4520928838	0.4009506036	0.7620192312	0.5261686152	0.4580051925	6.0433162271
Sidrauski	ENST00000233575	183.00001	106.00001	67.9843445695	58.4589042564	1.8132397682	2.6917963416	30	3059.00001	3199.7964844	931.00001	2751.46576033	0.9559983033	0.3383651083	0.3043478284	0.8598877378	0.353939026	-1.6744894157	7.7810451894
Sidrauski	ENST00000618852	80.00001	51.00001	28.7610994503	17.4460888795	2.9232918823	2.7815351822	48	409.00001	896.387599535	165.00001	543.736436744	0.4562758456	0.3034558636	0.4034229975	0.6065862993	0.6650710673	1.5978548004	3.3597883499
Sidrauski	ENST00000263390	17.00001	7.00001	4.4395086106	3.472589896	2.0157894279	3.8292548773	33	357.00001	242.424076251	156.00001	189.624454323	1.4726260507	0.822678755	0.4369748057	0.7822014103	0.5586474276	0.1133769674	3.4228186771
Sidrauski	ENST00000296490	156.00001	109.00001	84.1369672537	79.6170511111	1.3690535944	1.854119718	42	1025.00001	1885.06871871	409.00001	1783.8010737	0.543746761	0.229285662	0.3990243961	0.9462790698	0.4216772925	-0.3011502413	2.7768153285
Sidrauski	ENST00000368521	267.00001	230.00001	162.735948706	156.639344491	1.4683412443	1.640694709	39	1976.00001	3175.43735809	730.00001	3056.47541429	0.6222764889	0.2388371935	0.3694332016	0.9625368318	0.3838120157	-0.6726036889	6.3318518466
Sidrauski	ENST00000222803	25.00001	32.00001	12.394959744	9.2546371633	3.4577271302	2.0169496728	33	350.00001	238.509073861	170.00001	178.081654506	1.4674494531	0.9546183209	0.4857143004	0.7466451973	0.6505289288	1.5133605966	29.4222775169
Sidrauski	ENST00000310574	91.00001	47.00001	38.4512535933	38.8857939833	1.2086678755	2.3666331133	36	1191.00001	2036.84835007	435.00001	2059.86692017	0.5847268944	0.2111786959	0.3652393	1.0113010721	0.3611578294	-1.3022144552	10.8318936517
Sidrauski	ENST00000388948	0.00001	0.00001	0.7039500117	0.4857255299	2.0587758691E-005	1.4205554135E-005	54	5.00001	78.8293652027	4.00001	54.3922644336	0.0634282667	0.0735400528	0.8000004	0.690000031	1.1594208175	0.8669360553	46.313781633
Sidrauski	ENST00000271843	106.00001	52.00001	252.326340653	214.862471189	0.2420153213	0.4200909415	42	1432.00001	2643.41880684	418.00001	2250.94017436	0.5417227139	0.1857001864	0.2918994463	0.8515261254	0.3427956437	-1.0864901436	13.698099606
Sidrauski	ENST00000341114	40.00001	35.00001	1.4610474202	1.0957856066	31.940563727	27.3776261109	39	2.00001	66.2716124691	1.00001	49.7037112346	0.030178985	0.0201194232	0.5000025	0.7500000284	0.6666699747	0.1933001219	3.8909444891
Sidrauski	ENST00000335791	69.00001	47.00001	22.1673572147	20.8013016263	2.2594744716	3.112685438	105	155.00001	191.694860485	44.00001	179.881732158	0.8085767642	0.2446052163	0.2838710139	0.9383753519	0.3025132889	-2.0287301002	5.0106651057
Sidrauski	ENST00000292577	371.00001	171.00001	17.5799666022	11.644849926	14.6846040169	21.1035673955	132	9.00001	124.125218736	3.00001	82.2196979624	0.0725075057	0.0364877283	0.3333340741	0.6623931768	0.5032269138	-0.1775195302	3.610065123
Sidrauski	ENST00000305103	130.00001	69.00001	52.4617636344	47.7509114858	1.4449988043	2.4779954198	147	126.00001	240.538970677	76.00001	218.939553343	0.523823685	0.3471278206	0.6031746347	0.9102040835	0.6626806511	1.1878043348	11.3900087393
Sidrauski	ENST00000323557	400.00001	293.00001	223.810708587	177.314219412	1.6524338035	1.7872246262	195	989.00001	1506.99210449	295.00001	1193.91574404	0.6562741816	0.247086121	0.2982810991	0.792250829	0.3764983111	-1.140379706	23.8536677128
Sidrauski	ENST00000373095	17.00001	6.00001	11.9189192664	7.2972976448	0.8222235534	1.4263046523	144	41.00001	95.5168946766	16.00001	58.4797325145	0.42924354	0.2735992337	0.3902440512	0.6122449093	0.6373986051	0.4806383888	9.5510905907
Sidrauski	ENST00000262644	133.00001	77.00001	110.059452856	100.931518421	0.7628936055	1.2084378629	111	1389.00001	1069.85720389	446.00001	981.127102485	1.2983041148	0.4545792374	0.3210943173	0.9170636034	0.3501330945	-1.1210719796	8.1943917691
Sidrauski	ENST00000346473	77.00001	67.00001	21.7880806291	19.0066236755	3.5250874192	3.5340428242	105	37.00001	105.620314669	64.00001	92.1368709603	0.3503114918	0.6946188788	1.7297295325	0.8723404323	1.9828606682	5.1372490747	3.8166238136
Sidrauski	ENST00000297661	91.00001	56.00001	52.136380574	49.1780624753	1.1387193228	1.745422467	87	693.00001	903.697263283	258.00001	852.419749572	0.7668497385	0.3026677997	0.3722943814	0.9432580845	0.3946898388	-0.9090978289	8.0172004626
Sidrauski	ENST00000345146	255.00001	176.00001	102.204030605	99.0302270781	1.7772352462	2.4950093308	90	1539.00001	1412.68682302	579.00001	1368.81780539	1.0894134389	0.4229927516	0.3762183276	0.9689463957	0.3882756872	-1.0536953591	8.943856056
Sidrauski	ENST00000322428	424.00001	209.00001	267.477639714	279.177103041	0.7486287655	1.5851792713	180	601.00001	1144.20990322	221.00001	1194.25760745	0.5252532847	0.1850522104	0.3677204764	1.0437399677	0.3523104296	-1.354765136	5.0273136414
Sidrauski	ENST00000564996	17.00001	11.00001	17.4035899632	14.396687064	0.764065368	0.9768105337	99	215.00001	325.218600322	85.00001	269.02900069	0.6610938298	0.3159511048	0.3953488653	0.8272251354	0.477921727	-0.3212537758	14.9968649687
Sidrauski	ENST00000326266	0.00001	0.00001	99.331924482	87.9069773362	1.13756612991E-007	1.00672568785E-007	84	823.00001	1212.08598326	353.00001	1072.67442583	0.6789947424	0.3290840179	0.4289185975	0.8849821223	0.4846635731	0.0251312867	4.5586956412
Sidrauski	ENST00000303391	111.00001	29.00001	45.6082818705	31.5949548834	0.9178683783	2.4337687246	105	628.00001	634.172300295	217.00001	439.320325045	0.9902671714	0.4939448453	0.3455414117	0.6927460011	0.4987995761	0.1922958124	7.5412930272
Sidrauski	ENST00000266000	119.00001	87.00001	103.809670361	91.8372989102	0.9473276221	1.1463287533	96	1310.00001	2402.76132856	587.00001	2125.65081436	0.5452060487	0.2761507234	0.4480916073	0.8846699791	0.5065070793	0.1929875408	4.5485555663
Sidrauski	ENST00000264645	139.00001	47.00001	68.7397961152	54.7871722085	0.8578652284	2.0221184504	81	1629.00001	1791.47789629	734.00001	1427.84840163	0.9093051125	0.5140601826	0.4505831832	0.7970226172	0.5653329949	0.7656846582	7.3023923096
Sidrauski	ENST00000361813	231.00001	175.00001	206.949989237	192.568545938	0.9087673646	1.1162117517	93	1980.00001	6787.06953948	578.00001	6315.42005495	0.2917312101	0.0915220215	0.2919191955	0.9305076393	0.3137203642	-1.9154899235	4.2617605863
Sidrauski	ENST00000242719	222.00001	100.00001	86.0359925584	75.8560314689	1.3182868661	2.5803155563	105	200.00001	380.197148067	72.00001	335.211415253	0.5260428991	0.2147898512	0.360000032	0.8816778794	0.4083124239	-0.6474896454	11.1417338094
Sidrauski	ENST00000439220	66.00001	13.00001	105.3315795	76.0973689737	0.1708338958	0.6265928064	105	2347.00001	1356.2694808	831.00001	979.844217642	1.7304820637	0.8480940082	0.354069027	0.7224554054	0.4900911868	-0.005684075	5.0040072677
Sidrauski	ENST00000284268	36.00001	25.00001	25.1995612971	16.8640742801	1.4824418812	1.4285966956	132	439.00001	282.15872422	164.00001	188.826528682	1.5558619044	0.8685220829	0.3735763241	0.6692209472	0.5582256886	0.536321075	9.5263070656
Sidrauski	ENST00000607016	85.00001	46.00001	31.1479052196	24.1453812418	1.9051266799	2.7289157778	120	597.00001	134.455124198	213.00001	104.22756236	4.4401432341	2.043605407	0.3567839304	0.7751847539	0.4602566402	-0.061831276	6.758439593
Sidrauski	ENST00000492406	158.00001	96.00001	83.1434420868	86.3077976222	1.1122982239	1.9003303933	174	279.00001	608.762903555	152.00001	631.931805579	0.4583065236	0.240532299	0.5448028837	1.0380589913	0.5248284426	0.3698213869	7.696716519
Sidrauski	ENST00000457542	31.00001	12.00001	11.0778485965	9.2629979328	1.2954779961	2.7983781986	105	250.00001	477.50802617	106.00001	399.279320418	0.5235514301	0.265478337	0.424000023	0.8361730035	0.5070721266	-0.0489271146	11.2681991258
Sidrauski	ENST00000370113	26.00001	19.00001	32.0285717143	31.7428574286	0.5985601656	0.8117755057	81	431.00001	392.251149884	211.00001	388.752031718	1.098785842	0.5427624624	0.4895591766	0.9910793935	0.4939656498	0.0597152734	5.46326934
Sidrauski	ENST00000484952	71.00001	38.00001	156.831494707	150.986842755	0.2516776251	0.4527152542	153	1627.00001	1970.13158711	681.00001	1896.71053447	0.825833168	0.3590426676	0.4185617737	0.9627329194	0.4347641649	-0.5469312804	4.4720138359
Sidrauski	ENST00000262879	118.00001	89.00001	55.039940082	39.8602101962	2.2328033285	2.1438978644	93	2104.00001	2653.75367019	888.00001	1921.86217763	0.7928392276	0.4620518684	0.4220532347	0.7242051888	0.5827812908	0.7345821249	3.816131819
Sidrauski	ENST00000376901	104.00001	51.00001	102.491104004	117.144128915	0.4353612125	1.0147223119	90	1427.00001	1003.27402919	563.00001	1146.71086193	1.4223432168	0.4909694577	0.3945339916	1.1429687489	0.3451835337	-1.6616039577	5.0826494625
Sidrauski	ENST00000358932	269.00001	154.00001	175.61866217	171.419879209	0.8983789436	1.5317279307	135	75.00001	1083.63218954	53.00001	1057.72414356	0.0692116852	0.0501075922	0.7066667058	0.9760914762	0.7239759008	2.0454675399	20.8056647981
Sidrauski	ENST00000449309	118.00001	69.00001	59.9854848024	47.5971783508	1.4496659758	1.9671427244	231	335.00001	446.904845649	192.00001	354.609281133	0.7496003081	0.5414410175	0.5731343411	0.7934782641	0.72230629	1.1004810868	10.6521191328
Sidrauski	ENST00000287461	79.00001	60.00001	92.5821825233	98.9424870059	0.6064129962	0.853296043	141	373.00001	986.230057801	209.00001	1053.98308853	0.3782079111	0.1982954113	0.5603217276	1.0686990122	0.5243026533	0.495648509	6.5406670185
Sidrauski	ENST00000371320	20.00001	19.00001	19.1381808329	12.5546468897	1.5133846588	1.0450319273	159	61.00001	140.346659442	12.00001	92.0674105248	0.4346381328	0.1303393886	0.1967214432	0.6560000138	0.2998802424	-1.4034019727	15.9906672515
Sidrauski	ENST00000283629	149.00001	61.00001	495.818708621	401.774349894	0.1518265415	0.3005130855	336	555.00001	2393.50578983	196.00001	1939.51784383	0.2318774462	0.1010560489	0.3531531648	0.8103251106	0.4358166373	-0.3266611355	25.3747592764
Sidrauski	ENST00000394785	99.00001	52.00001	70.3071027831	62.9174674664	0.8264797058	1.4081082292	330	349.00001	343.652596331	132.00001	307.532954616	1.0155605217	0.4292223257	0.3782235135	0.8948948965	0.4226457375	-0.7543570816	15.7125730535
Sidrauski	ENST00000343348	80.00001	35.00001	7.1632742556	4.2989241538	8.141574205	11.1680786112	33	808.00001	671.177090858	341.00001	402.79616617	1.2038551688	0.8465820647	0.4220297101	0.6001339612	0.703225842	1.0101442898	12.1263790766
Sidrauski	ENST00000300181	205.00001	134.00001	9.6307177969	7.5119599287	17.8382221514	21.2860572102	51	330.00001	224.150235783	127.00001	174.837185006	1.4722269145	0.7263901555	0.3848485035	0.7800000049	0.4933955142	-0.1856302119	12.4797679297
Sidrauski	ENST00000356175	56.00001	27.00001	22.5618832268	15.5399612077	1.7374567181	2.4820627532	45	2162.00001	4239.62854591	938.00001	2920.13137717	0.509950338	0.3212184278	0.4338575419	0.6887705717	0.6299013921	0.8340682368	3.1626152424
Sidrauski	ENST00000361528	39.00001	32.00001	12.677201079	8.6979685734	3.6790211105	3.076389635	39	778.00001	623.783304375	335.00001	427.984658777	1.247228011	0.7827383602	0.430591267	0.6861111155	0.6275824094	0.6155329067	4.4447368129
Sidrauski	ENST00000529930	109.00001	103.00001	13.0987956145	12.5349401928	8.2170324243	8.3213764997	36	486.00001	186.293982072	227.00001	178.274704964	2.6087799756	1.2733158641	0.4670782003	0.9569536438	0.4880886376	-0.133954796	5.8387942078
Sidrauski	ENST00000269740	99.00001	67.00001	17.9500667976	15.0499336418	4.451847536	5.5153003672	33	587.00001	513.480698695	211.00001	430.519313875	1.1431783346	0.4901057936	0.3594548661	0.8384332945	0.4287220802	-0.6846603847	14.8719746935
Sidrauski	ENST00000392102	174.00001	127.00001	39.5357359956	28.7002216006	4.4250532894	4.4010818471	69	1736.00001	2062.16107026	728.00001	1496.98692088	0.841835313	0.4863102007	0.4193548421	0.7259311324	0.5776785474	0.5319217545	8.5571065447
Sidrauski	ENST00000487099	12.00001	8.00001	7.2702318774	6.3315318347	1.263518878	1.6505677126	33	63.00001	317.687102037	20.00001	276.668754718	0.1983083657	0.0722886472	0.3174604258	0.8708844424	0.3645264634	-1.2091713647	7.7164365406
Sidrauski	ENST00000297625	17.00001	9.00001	5.2474211582	2.8776180947	3.1275901471	3.2396885037	57	198.00001	197.376683564	56.00001	108.238827984	1.0031580551	0.5173745045	0.282828319	0.5483871044	0.5157457511	-0.0051900311	5.1693170705
Sidrauski	ENST00000366962	88.00001	64.00001	60.5627018305	56.2940419036	1.1368878097	1.4530396984	81	759.00001	1221.72166409	398.00001	1135.61067248	0.6212544414	0.3504722346	0.5243741828	0.929516686	0.5641363847	0.878088892	4.3129123062
Sidrauski	ENST00000369063	100.00001	91.00001	15.374554459	14.0546971463	6.4747044389	6.5042541731	60	335.00001	304.928663436	130.00001	278.751493401	1.0986176446	0.4663652503	0.3880597198	0.9141531342	0.4245018753	-0.6405327232	2.7160988463
Sidrauski	ENST00000458549	72.00001	40.00001	21.4832901181	21.0222134721	1.9027496821	3.3514424283	72	295.00001	340.748851595	116.00001	333.435663682	0.8657402912	0.3478932299	0.3932203596	0.9785378942	0.4018447951	-0.9404864095	12.1100969075
Sidrauski	ENST00000303407	192.00001	122.00001	24.0976646762	15.6050956741	7.817959758	7.9675774636	75	1739.00001	700.438786589	565.00001	453.58811426	2.4827294594	1.2456234902	0.3248993713	0.6475770945	0.5017153542	-0.0251523062	5.9876627622
Sidrauski	ENST00000498286	60.00001	44.00001	8.5382702736	7.2583586958	6.0619778994	7.0271856099	36	1531.00001	492.847934124	744.00001	418.968593606	3.1064348737	1.7757894538	0.4859568943	0.850097088	0.5716486989	0.6366765973	8.8134555227
Sidrauski	ENST00000512111	54.00001	40.00001	23.8474577288	18.8949153559	2.116972172	2.2643927338	33	1093.00001	1345.57473609	370.00001	1066.13128463	0.8122923095	0.3470492005	0.3385178469	0.7923240947	0.42724669	-0.5554655382	6.0948395245
Sidrauski	ENST00000296440	14.00001	1.00001	2.085678341	1.5014700252	0.6660206219	6.7124492423	39	174.00001	342.639516179	74.00001	246.664575678	0.5078223666	0.3000025837	0.4252873894	0.7198952953	0.5907628403	0.096253381	2.9493432843
Sidrauski	ENST00000332439	0.00001	0.00001	41.5990312425	34.6868055372	2.88294060094E-007	2.40390213457E-007	63	142.00001	452.967229085	91.00001	377.700771405	0.3134884841	0.240931491	0.6408450957	0.8338368587	0.7685497337	2.7745832229	11.6844918224
Sidrauski	ENST00000373983	25.00001	31.00001	10.5325380586	7.8383948915	3.9548926061	2.3735978794	36	652.00001	573.73075369	317.00001	426.974788398	1.1364215807	0.7424326181	0.4861963269	0.744207602	0.6533073911	0.8795557827	7.0399999259
Sidrauski	ENST00000432807	142.00001	62.00001	40.2104353304	29.9660875043	2.0690058384	3.5314218519	126	34.00001	81.0591315391	16.00001	60.4078271913	0.4194470056	0.264866504	0.470588391	0.7452316111	0.631465955	1.3654314701	10.4844425912
Sidrauski	ENST00000262241	58.00001	27.00001	19.1824818248	14.8759124818	1.8150153836	3.023592595	42	1256.00001	665.449429018	552.00001	516.05248776	1.8874462209	1.0696586551	0.4394904503	0.7754946736	0.5667227194	0.8025248874	4.4750778468
Sidrauski	ENST00000377990	36.00001	33.00001	16.4243202514	12.9702412365	2.5442865247	2.1918721414	51	540.00001	732.009410421	236.00001	578.06584962	0.7376954481	0.4082580041	0.4370370475	0.7896972927	0.5534235099	0.4564996489	7.7887787494
Sidrauski	ENST00000377045	70.00001	48.00001	16.0008137917	14.8901547193	3.2236072025	4.3747781151	30	960.00001	970.716036697	339.00001	903.33605297	0.9889606988	0.375275634	0.3531250067	0.9305873384	0.3794646587	-1.075202825	2.9077711275
Sidrauski	ENST00000261211	41.00001	22.00001	12.1529950204	10.7312966803	2.0500793758	3.3736548012	30	1238.00001	636.411839237	473.00001	561.962236158	1.9452812372	0.8416935864	0.3820678564	0.8830166278	0.4326847812	-0.5033868971	2.5399484372
Sidrauski	ENST00000367505	35.00001	29.00001	43.4672962755	32.6687960672	0.887697543	0.8052032907	48	1830.00001	4574.02736433	848.00001	3437.71018616	0.4000850595	0.246675829	0.4633879811	0.7515718452	0.6165584622	0.9548296283	4.8993807291
Sidrauski	ENST00000366503	15.00001	17.00001	12.9779343731	12.1775331695	1.3960142636	1.1558087419	114	75.00001	133.080748089	38.00001	124.873125221	0.5635676916	0.3043089531	0.5066667324	0.9383259939	0.5399687696	0.0186752552	10.1868757463
Sidrauski	ENST00000333957	67.00001	50.00001	73.2511273512	55.2842653133	0.9044166494	0.9146618274	93	1254.00001	2364.51488504	459.00001	1784.55230614	0.5303413474	0.2572073726	0.3660287132	0.7547223819	0.4849845744	-0.090735664	11.4058354429
Sidrauski	ENST00000350082	70.00001	49.00001	28.5873121648	24.1334207325	2.0303798017	2.4486390884	120	159.00001	452.155987407	89.00001	381.710271252	0.351648578	0.233161161	0.5597484554	0.8442004129	0.6630516247	1.1900758694	3.6568578371
Sidrauski	ENST00000394907	13.00001	8.00001	12.098361717	8.9145825971	0.8974071318	1.0745264776	123	8.00001	34.1311505349	4.00001	25.1492696031	0.234390282	0.1590507424	0.500000625	0.7368421283	0.6785722555	0.8653458517	5.6812932369
Sidrauski	ENST00000368607	23.00001	8.00001	15.4623294863	17.3321925	0.4615694177	1.4874867348	126	145.00001	145.664961113	75.00001	163.280257917	0.9954350648	0.4593329957	0.5172414126	1.1209302269	0.4614394368	-0.4189902379	6.9798926678
Sidrauski	ENST00000479665	178.00001	102.00001	29.3389292116	22.3323418763	4.5673673887	6.0670247614	87	164.00001	397.255846107	100.00001	302.385042877	0.4128322128	0.3307042208	0.6097561214	0.7611846266	0.8010620552	2.0447000364	17.4293058806
Sidrauski	ENST00000431474	24.00001	12.00001	17.2449159025	19.6436447161	0.6108851068	1.3917151081	153	26.00001	180.451701699	20.00001	205.552125428	0.1440829305	0.0972989696	0.769230858	1.1390977391	0.6752983801	0.6414820447	15.5712839679
Sidrauski	ENST00000294964	8.00001	5.00001	15.4100723501	12.8824944125	0.3881243678	0.5191416249	102	48.00001	223.748207358	15.00001	187.04876691	0.2145269031	0.080193044	0.3125001432	0.8359788403	0.3738134605	-1.0872087588	11.2455932874
Sidrauski	ENST00000366835	65.00001	41.00001	21.6144463836	17.8662765447	2.2948267871	3.0072484322	128	358.00001	409.154715527	164.00001	338.203031779	0.8749746646	0.4849158481	0.4581005738	0.8265895979	0.5542055876	0.2179548796	5.8626390911
Sidrauski	ENST00000357628	175.00001	105.00001	87.9352946471	88.5176475882	1.1862042526	1.990099774	216	754.00001	775.133338	350.00001	780.266671333	0.9727358804	0.4485646034	0.4641909885	1.0066225165	0.4611371005	-0.3179413592	6.7905771336
Sidrauski	ENST00000614363	428.00001	195.00001	223.580215428	206.05347746	0.9463563168	1.9143018052	114	39.00001	445.199200896	23.00001	410.299468275	0.0876012579	0.056056641	0.5897436949	0.9216087258	0.6399068047	1.3960220944	6.8500603345
Sidrauski	ENST00000347230	29.00001	13.00001	31.2120931132	22.489612493	0.5780450866	0.9291273704	87	572.00001	2733.39008539	258.00001	1969.52135154	0.2092639514	0.1309963001	0.4510489606	0.7205416315	0.6259859819	0.815408656	5.9046454407
Sidrauski	ENST00000396852	0.00001	0.00001	1.5762074314	1.2354059167	8.0945055102E-006	6.34434262966E-006	135	18.00001	24.4370529915	10.00001	19.1533672862	0.7365867728	0.5221019286	0.5555558025	0.7837838422	0.7088125227	0.1340780167	4.475142298
Sidrauski	ENST00000289865	66.00001	24.00001	36.16400959	27.7448751936	0.8650249761	1.8250191488	105	151.00001	584.479278802	52.00001	448.41003051	0.2583496378	0.115965314	0.3443709043	0.7671957703	0.4488696597	-0.5249491188	6.5506829148
Sidrauski	ENST00000406341	179.00001	114.00001	100.222424918	62.9466728669	1.8110569599	1.7860275297	81	1259.00001	5355.09450673	443.00001	3363.37284158	0.235103229	0.1317130247	0.3518665659	0.6280697451	0.5602348604	0.7288890495	8.6509090647
Sidrauski	ENST00000361272	60.00001	33.00001	72.4547954868	70.441197917	0.468475991	0.8281026756	120	152.00001	517.447997768	53.00001	503.067555124	0.2937493442	0.1053536637	0.3486842534	0.9722089124	0.3586515706	-1.2817491161	3.1494985341
Sidrauski	ENST00000296564	94.00001	55.00001	91.3374543913	80.4501073496	0.6836536558	1.0291507534	96	1297.00001	6469.73635272	535.00001	5698.54927059	0.2004718491	0.0938835455	0.4124903669	0.8808008487	0.4683128627	-0.1775743397	10.7032766666
Sidrauski	ENST00000341119	64.00001	57.00001	45.3693453375	38.0336222225	1.4986742432	1.4106443354	189	201.00001	243.89023737	113.00001	204.455873958	0.8241412701	0.5526865422	0.5621890765	0.8383110212	0.6706211206	1.3281333968	8.6926042457
Sidrauski	ENST00000268989	25.00001	10.00001	34.0629243307	28.3787787415	0.3523763334	0.7339361048	102	232.00001	1053.61300258	100.00001	877.79457774	0.2201947104	0.1139218817	0.4310345073	0.8331280798	0.5173688389	0.2506494161	49.4474514419
Sidrauski	ENST00000352511	45.00001	31.00001	115.021233535	89.2843246443	0.3472055159	0.3912321979	162	240.00001	1091.99171097	83.00001	847.649946314	0.2197818972	0.0979177907	0.3458333606	0.7762421068	0.4455225471	-0.220927166	7.6222434552
Sidrauski	ENST00000378230	130.00001	95.00001	68.6791721684	52.0647574735	1.8246509656	1.8928593036	201	1014.00001	948.86597568	435.00001	719.322544796	1.0686440825	0.6047356824	0.4289940885	0.7580865615	0.5658906387	0.5198884079	5.3681917016
Sidrauski	ENST00000447648	63.00001	32.00001	13.4990860695	9.5356491408	3.3558292181	4.6669833555	96	422.00001	491.732333176	157.00001	347.355885888	0.858190486	0.4519860362	0.3720379296	0.7063922025	0.5266733243	-0.0507549576	4.0032016649
Sidrauski	ENST00000372409	61.00001	25.00001	33.7590103531	21.5449586604	1.1603647236	1.8069253027	144	532.00001	495.601026989	220.00001	316.291962556	1.0734441235	0.6955599131	0.4135338456	0.6381987634	0.6479703023	0.5758766639	3.5318675104
Sidrauski	ENST00000320934	191.00001	109.00001	15.5259197462	10.8023232738	10.0904228875	12.3020093574	90	178.00001	406.606587131	95.00001	282.90084396	0.4377696172	0.3358067395	0.5337078914	0.6957606023	0.7670855314	1.2573527086	3.3105022742
Sidrauski	ENST00000262435	87.00001	46.00001	61.1925979781	56.6278275874	0.812321644	1.4217407477	90	348.00001	1527.09527843	84.00001	1413.17889735	0.2278836265	0.0594404644	0.2413793321	0.9254032262	0.2608369253	-2.6642090397	8.6632709013
Sidrauski	ENST00000311413	199.00001	93.00001	70.0452105059	55.2766421529	1.6824468053	2.8410223706	168	409.00001	542.433445644	151.00001	428.064949053	0.7540095717	0.3527502318	0.3691931695	0.7891566283	0.4678325648	-0.280826638	4.7216090147
Sidrauski	ENST00000562435	109.00001	64.00001	52.3020987863	47.5436440342	1.3461317764	2.084046578	102	427.00001	808.63146849	124.00001	735.062025902	0.528052675	0.1686932607	0.2903981431	0.9090198125	0.3194629414	-2.0240392808	8.2040133474
Sidrauski	ENST00000373275	60.00001	30.00001	36.6526667991	25.9653809718	1.1553849348	1.6369889353	84	1067.00001	2359.73359582	404.00001	1671.6759559	0.4521696906	0.2416736381	0.3786316834	0.7084172378	0.5344755368	0.3150945472	31.1648932026
Sidrauski	ENST00000218056	40.00001	32.00001	39.9449157203	40.6906784322	0.7864211469	1.0013792564	99	598.00001	587.876183884	267.00001	598.851701775	1.0172210176	0.4458533043	0.4464883036	1.0186697781	0.438305242	-0.6298644614	4.6774066614
Sidrauski	ENST00000361443	2.00001	3.00001	0.7088686173	0.3308056068	9.0688003426	2.821411403	81	42.00001	12.8821556126	20.00001	6.0116771995	3.2603246897	3.3268602648	0.4761906009	0.4666670222	1.0204076531	0.5055109408	10.5016283224
Sidrauski	ENST00000291906	111.00001	56.00001	79.9813341244	66.13688968	0.8467288116	1.3878239369	267	892.00001	799.513785686	371.00001	661.121193093	1.1156780858	0.5611679279	0.4159192891	0.8269040571	0.5029837325	-0.0046410477	7.8739448066
Sidrauski	ENST00000320895	369.00001	200.00001	190.444800336	179.793600336	1.1123867013	1.9375693605	84	2494.00001	3663.79520646	867.00001	3458.88640646	0.6807149061	0.2506587115	0.347634325	0.9440719832	0.3682286215	-1.1411724941	4.3171557508
Sidrauski	ENST00000344924	94.00001	55.00001	76.0867091671	62.3377074558	0.8822911885	1.2354327192	117	359.00001	506.594414027	197.00001	415.051915454	0.7086537081	0.4746394431	0.5487465307	0.8192982472	0.6697762781	1.6781797062	4.6260869404
Sidrauski	ENST00000335965	80.00001	35.00001	74.973789579	63.2216053058	0.5536083722	1.0670397008	108	145.00001	717.804615044	57.00001	605.28833228	0.202004845	0.0941700128	0.3931034901	0.8432494297	0.4661770009	-0.2972224718	5.5505952263
Sidrauski	ENST00000397463	126.00001	40.00001	6.5679541936	8.8302492755	4.5298845765	19.184057362	138	81.00001	20.2273951613	38.00001	27.194608276	4.0044706377	1.3973361783	0.469135868	1.3444444062	0.348944044	-1.2953586355	8.355437555
Sidrauski	ENST00000392446	238.00001	121.00001	73.3007383856	54.0867162454	2.2371483869	3.2468978518	123	415.00001	718.108859794	168.00001	529.873927445	0.5779068234	0.3170565701	0.4048192915	0.7378740984	0.5486292206	0.617618414	9.1919694555
Sidrauski	ENST00000361735	147.00001	84.00001	98.856627881	75.4265106583	1.1136669225	1.487002067	96	1936.00001	2161.45897836	927.00001	1649.16922783	0.8956913036	0.5621012049	0.4788223167	0.762988909	0.6275613067	1.2876418021	4.1364670048
Sidrauski	ENST00000539826	72.00001	46.00001	76.3073142471	60.8703136325	0.7557051583	0.9435531929	84	466.00001	4095.15919793	182.00001	3266.70683161	0.1137928924	0.0557136038	0.390557953	0.7976995945	0.4896053047	-0.0019511633	2.9636718634
Sidrauski	ENST00000550831	43.00001	25.00001	13.4439842324	12.5311211618	1.9950337785	3.1984573365	120	45.00001	82.5684698271	24.00001	76.9619691355	0.5450023489	0.3118424628	0.533333437	0.9320987696	0.5721855391	0.1998348903	4.279114492
Sidrauski	ENST00000358812	83.00001	68.00001	30.6295083934	30.963934623	2.196103655	2.70980549	90	560.00001	472.375085001	273.00001	477.53268063	1.1854986171	0.5716886426	0.4875000092	1.0109184328	0.4822347613	-0.0680436658	3.104438622
Sidrauski	ENST00000264451	144.00001	93.00001	74.9478933194	74.5551625378	1.2473986621	1.9213349919	66	1366.00001	1937.28948489	660.00001	1927.13798923	0.7051088754	0.3424767784	0.4831625221	0.994759949	0.485707655	0.2159641483	6.5090673455
Sidrauski	ENST00000296861	183.00001	97.00001	28.9093189068	22.4895692545	4.3131110651	6.3301391012	147	389.00001	386.834219658	197.00001	300.931855263	1.0055987558	0.6546332884	0.5064267479	0.7779349395	0.6509885624	0.7496881543	8.9104040427
Sidrauski	ENST00000227756	26.00001	21.00001	23.31349875	21.402556258	0.9811916739	1.1152341516	87	291.00001	488.51158875	101.00001	448.469655843	0.5956870148	0.2252103541	0.3470790602	0.9180327881	0.3780682615	-1.1791101343	3.6774192701
Sidrauski	ENST00000268797	108.00001	57.00001	27.8269053951	23.1618066181	2.4609483595	3.8811362049	87	151.00001	370.065856806	45.00001	308.025405254	0.4080355083	0.1460918782	0.2980132915	0.8323529436	0.358037169	-1.3686373388	3.6031268575
Sidrauski	ENST00000428135	77.00001	44.00001	85.7654556536	76.2609724068	0.5769662858	0.8977974805	159	413.00001	1549.71166096	177.00001	1377.97341965	0.2665011953	0.1284495096	0.4285714424	0.8891805194	0.4819847411	-0.0752843474	3.8325259383
Sidrauski	ENST00000358154	128.00001	58.00001	105.641277936	104.579852875	0.5546002256	1.2116476864	96	656.00001	1052.01105945	193.00001	1041.44103488	0.6235675986	0.1853201512	0.2942073278	0.9899525538	0.2971933622	-2.3194023193	15.3014612749
Sidrauski	ENST00000362065	80.00001	65.00001	41.4393786956	33.7108978123	1.9281601565	1.930531116	120	653.00001	1054.28685965	339.00001	857.661425175	0.6193760304	0.3952608804	0.519142427	0.813499113	0.6381597947	1.0283393311	11.4328062488
Sidrauski	ENST00000318709	29.00001	23.00001	41.3052135391	36.2303066356	0.6348279144	0.7020907899	93	633.00001	864.300489754	241.00001	758.109427021	0.7323841853	0.3178960733	0.380726708	0.877136408	0.4340564416	-0.5229693236	11.5244641669
Sidrauski	ENST00000368073	92.00001	53.00001	155.139308643	126.863614537	0.4177715588	0.5930154698	129	1729.00001	2156.31612711	757.00001	1763.30589818	0.8018304868	0.4293072522	0.4378253358	0.8177399761	0.5354089914	0.5446029088	4.3160220836
Sidrauski	ENST00000392222	998.00001	642.00001	369.39344377	436.983607705	1.4691626841	2.7017263756	126	1500.00001	1984.75683677	618.00001	2347.91986045	0.7557600922	0.2632117137	0.4120000039	1.182976079	0.3482741631	-1.4253582472	5.6582877616
Sidrauski	ENST00000424310	22.00001	7.00001	48.1727099253	33.7182399557	0.2076030662	0.4566903135	96	536.00001	999.081931888	220.00001	699.302247415	0.5364925467	0.3145993178	0.4104477722	0.6999448445	0.5864001649	0.6914285169	21.410861739
Sidrauski	ENST00000378392	24.00001	9.00001	35.7346240014	26.9937808777	0.3334105008	0.6716178124	186	245.00001	447.643408189	117.00001	338.147900242	0.5473106618	0.3460024738	0.4775510417	0.7553956879	0.6321866135	0.4577652424	9.2779719469
Sidrauski	ENST00000294753	28.00001	20.00001	66.3120319284	49.0788984951	0.407507312	0.4222462981	237	123.00001	493.283174219	50.00001	365.089021295	0.2493496969	0.1369529268	0.4065041133	0.7401205644	0.5492403979	0.385493765	6.5679163904
Sidrauski	ENST00000608872	175.00001	99.00001	67.99343413	51.6480631517	1.9168194112	2.5737780749	108	325.00001	858.731890309	140.00001	652.295908693	0.3784650526	0.214626534	0.4307692483	0.7596036855	0.5670973648	0.9460146741	5.7333333224
Sidrauski	ENST00000233027	66.00001	46.00001	67.6349679594	58.1921744973	0.7904844663	0.9758267357	93	799.00001	1836.32574298	238.00001	1579.94882372	0.4351079938	0.1506377969	0.2978723492	0.8603859254	0.3462078358	-1.5407710506	11.4357681659
Sidrauski	ENST00000376649	50.00001	21.00001	50.926722318	40.781387682	0.5149410354	0.9818030245	117	1377.00001	558.452860975	585.00001	447.201029025	2.4657408104	1.3081365472	0.4248366055	0.8007856352	0.5305247582	0.4392477163	24.7168927248
Sidrauski	ENST00000304743	60.00001	25.00001	100.782723258	81.0536420598	0.3084378365	0.5953402335	177	1162.00001	3999.9922649	527.00001	3216.95952243	0.2905005643	0.1638192854	0.453528404	0.8042414358	0.5639207131	0.5887705471	6.5398167263
Sidrauski	ENST00000318584	42.00001	16.00001	18.4510806753	16.4819930402	0.9707569929	2.2762899767	81	181.00001	338.725394619	74.00001	302.576835195	0.5343561861	0.2445660123	0.4088398117	0.8932806338	0.4576835053	-0.2036544501	5.7093877085
Sidrauski	ENST00000261520	52.00001	29.00001	41.827715489	32.3728673824	0.8958122139	1.2431950775	96	523.00001	1284.45942981	238.00001	994.116802536	0.4071751881	0.2394084975	0.455066932	0.7739573391	0.5879741802	0.7720877818	6.5536912438
Sidrauski	ENST00000394206	76.00001	57.00001	47.2792459245	44.6490572453	1.2766229237	1.6074708578	102	384.00001	259.572330566	145.00001	245.132078994	1.4793564829	0.5915178894	0.3776041829	0.9443690645	0.3998481071	-0.9653844626	10.1049249814
Sidrauski	ENST00000350908	5.00001	4.00001	18.051175508	17.2630784647	0.2317089625	0.2769908252	99	318.00001	391.473472885	142.00001	374.382115796	0.8123156025	0.3792916488	0.4465408979	0.9563409572	0.4669264602	-0.414786579	10.7610609946
Sidrauski	ENST00000233615	16.00001	8.00001	51.8972187867	53.6986098223	0.1489798344	0.3083018777	111	61.00001	378.241891878	31.00001	391.370949065	0.1612724854	0.0792087662	0.5081968019	1.0347107432	0.4911486667	-0.0558429624	3.5590768048
Sidrauski	ENST00000308660	87.00001	68.00001	10.2283130076	8.8141090038	7.7149045888	8.5058024657	138	114.00001	56.4039579623	58.00001	48.6053402312	2.0211349366	1.1932847239	0.5087719729	0.8617363389	0.5904032939	0.5194967141	3.4266834271
Sidrauski	ENST00000247161	84.00001	46.00001	48.7202229351	46.4359928794	0.9906111003	1.7241302469	81	283.00001	773.508724623	105.00001	737.243047443	0.3658653109	0.1424225164	0.3710247572	0.9531153612	0.3892758131	-1.2063276183	4.8108107775
Sidrauski	ENST00000263274	81.00001	61.00001	139.345745089	108.679078422	0.561285676	0.5812880038	138	1570.00001	2785.90515	704.00001	2172.79403889	0.5635511353	0.3240067845	0.4484076468	0.7799239105	0.574937684	0.667045512	4.8783958477
Sidrauski	ENST00000376004	28.00001	23.00001	39.8271850922	38.7000006262	0.5943154943	0.7030376346	129	352.00001	465.57670635	147.00001	452.40000732	0.7560515919	0.3249337038	0.4176136529	0.9716981137	0.4297771572	-0.6288453504	10.9417213009
Sidrauski	ENST00000448775	9.00001	13.00001	2.2056389965	1.9323740122	6.7274812835	4.0804546957	99	140.00001	24.974962778	77.00001	21.8807198758	5.6056143605	3.5190802879	0.5500000321	0.8761062057	0.6277778066	0.4133620357	11.0211145344
Sidrauski	ENST00000484302	119.00001	53.00001	119.612755974	91.9561233214	0.576361944	0.9948772523	171	597.00001	471.456125888	336.00001	362.446942214	1.2662896444	0.9270322656	0.5628140777	0.7687819127	0.7320854827	2.1336372337	5.1096773723
Sidrauski	ENST00000356413	32.00001	35.00001	84.4033621008	67.9159671429	0.5153428784	0.3791319351	126	413.00001	682.595444292	151.00001	549.256908878	0.6050436074	0.274916906	0.3656174488	0.8046595	0.4543753585	-0.3845035746	3.4376277416
Sidrauski	ENST00000620753	226.00001	129.00001	312.474971455	289.117579139	0.4461852869	0.7232579587	96	443.00001	3326.55646695	129.00001	3077.89756125	0.1331707471	0.0419117295	0.2911964043	0.9252503578	0.3147217419	-1.9208121104	5.7680327633
Sidrauski	ENST00000368896	42.00001	24.00001	3.3196040199	3.1448881108	7.6314352544	12.6521144535	123	4.00001	7.6647767614	5.00001	7.2613676705	0.5218690804	0.6885768945	1.249999375	0.9473684488	1.3194437461	1.6072925403	5.265588874
Sidrauski	ENST00000304842	34.00001	16.00001	32.3818531191	28.5255204159	0.5609015985	1.0499711019	120	176.00001	300.071838904	73.00001	264.336489187	0.5865262487	0.2761631972	0.4147727605	0.8809106851	0.4708454189	-0.0985752475	5.1884150058
Sidrauski	ENST00000397640	16.00001	6.00001	37.0865205634	37.9557358551	0.1580791378	0.4314238639	144	35.00001	95.549299507	22.00001	97.7887361268	0.3663031564	0.2249748884	0.6285715347	1.0234374991	0.6141767673	0.8792844925	11.0764330426
Sidrauski	ENST00000228705	41.00001	20.00001	16.2929326192	13.5994020038	1.4706536357	2.5164291143	93	333.00001	270.497720044	135.00001	225.779319289	1.2310640176	0.5979290328	0.4054054233	0.8346810437	0.4857010068	-0.167786215	14.817072719
Sidrauski	ENST00000254235	23.00001	8.00001	1.9002935191	1.4516131672	5.511116998	12.103398643	162	115.00001	38.029330795	47.00001	29.0501844933	3.0239819528	1.6178902413	0.4086957036	0.7638889217	0.5350198072	-0.259892234	10.9340417335
Sidrauski	ENST00000223023	121.00001	79.00001	35.1760993935	29.6786924036	2.6618426757	3.4398359138	81	1776.00001	658.791886171	644.00001	555.83427625	2.6958437821	1.1586187422	0.3626126162	0.8437175501	0.4297796296	-0.5536755425	25.9098785706
Sidrauski	ENST00000266971	31.00001	27.00001	35.8515233883	32.3591376015	0.8343859571	0.8646776223	129	376.00001	454.95305261	206.00001	410.634947703	0.8264589233	0.5016621482	0.5478723525	0.9025875205	0.6070019139	0.6251541608	13.781788238
Sidrauski	ENST00000441876	28.00001	20.00001	49.1739872128	37.3344601858	0.5356983843	0.5694069484	129	424.00001	409.020839375	200.00001	310.541672708	1.0366220231	0.6440359783	0.4716981257	0.759231909	0.621283326	0.7803544053	35.3394490781
Sidrauski	ENST00000263208	40.00001	15.00001	99.9985198446	73.0829017839	0.2052465027	0.4000060207	93	1017.00001	3282.74710845	372.00001	2399.16235641	0.3098015097	0.1550541209	0.3657817172	0.7308398354	0.5004950462	0.0819749855	5.5523672486
Sidrauski	ENST00000266529	482.00001	243.00001	70.6239742857	68.8374389819	3.5300559346	6.824878023	102	416.00001	452.13191381	142.00001	440.694584855	0.9200854823	0.3222186405	0.3413461697	0.9747035575	0.3502051132	-1.4527681861	5.0406022885
Sidrauski	ENST00000257536	6.00001	4.00001	1.5779225162	0.7451303084	5.3682019839	3.802474417	81	61.00001	22.6558504491	19.00001	10.6985993669	2.692461717	1.7759343395	0.3114755227	0.4722223688	0.6595950198	0.0332809074	8.9183954506
Sidrauski	ENST00000322886	66.00001	52.00001	51.4202092892	41.2787458746	1.2597284365	1.2835422281	132	1318.00001	1065.41115459	477.00001	855.28310581	1.2370811065	0.5577100807	0.3619119927	0.8027728095	0.4508274177	-0.3757481842	11.9825833673
Sidrauski	ENST00000277570	93.00001	72.00001	14.2574260396	9.4455448515	7.6226423284	6.5229172322	99	517.00001	188.226826604	178.00001	124.700273948	2.7466861091	1.4274227663	0.3442940166	0.662500007	0.5196890761	0.0123375563	6.5936221865
Oh	ENST00000214869	15.00001	2.00001	11.3910449104	9.1880598358	0.2176748994	1.3168247617	18	519.00001	432.226870769	29.00001	348.635825993	1.2007583172	0.0831813825	0.0558767041	0.8066037759	0.0692740423	0.6837447675	3.3105022579
Oh	ENST00000370128	32.00001	0.00001	10.849704213	9.9124261065	1.00883475877E-006	2.9493900821	18	705.00001	663.037479684	47.00001	605.759373176	1.0632883232	0.0775885807	0.0666666799	0.913612566	0.072970406	0.6947255169	2.5848849804
Oh	ENST00000396354	36.00001	3.00001	2.5594536417	2.41415715	1.2426738666	14.0655057834	18	286.00001	143.187212068	9.00001	135.058680556	1.9973851426	0.0666377752	0.0314685653	0.9432314423	0.0333625067	-0.3964083474	26.4961912242
Oh	ENST00000396475	62.00001	3.00001	10.5249481029	8.3575884356	0.3589564171	5.8907663386	30	372.00001	569.048860764	13.00001	451.866948082	0.6537224405	0.0287695528	0.0349462625	0.7940740756	0.0440088193	-0.1051038183	10.3829444056
Oh	ENST00000245680	37.00001	2.00001	14.1548051383	9.0020399524	0.2221729753	2.6139540346	27	463.00001	823.59995823	7.00001	523.785361675	0.5621661407	0.0133642719	0.0151188118	0.6359706025	0.0237728155	-0.979829244	7.2787878604
Oh	ENST00000377843	97.00001	9.00001	27.3763189566	22.0504103986	0.4081561221	3.5432086452	21	571.00001	1320.5814811	34.00001	1063.66979685	0.4323852925	0.0319648166	0.059544675	0.8054556361	0.0739266973	0.5258131027	6.3202016952
Oh	ENST00000379170	37.00001	2.00001	4.2420033339	3.3821970828	0.591334553	8.7222963037	24	284.00001	190.713399889	4.00001	152.057943848	1.489145546	0.0263058272	0.0140845418	0.7973112741	0.0176650478	-1.3393337479	4.7844733725
Oh	ENST00000378757	55.00001	4.00001	2.7588076423	2.5040650949	1.5974065563	19.9361525455	18	226.00001	265.611869115	0.00001	241.085822743	0.8508656287	4.14790048051E-008	4.42477856528E-008	0.9076620843	4.87491836629E-008	-1.3558982226	2.7255448486
Oh	ENST00000395074	0.00001	0.00001	0.8346974959	0.7512277741	1.33115419108E-005	1.19803881634E-005	51	4.00001	18.9852763775	5.00001	17.0867493726	0.2106901117	0.2926249979	1.249999375	0.9000000333	1.388888143	2.5408166954	18.2456137441
Oh	ENST00000296003	110.00001	24.00001	10.1042502967	8.8532478909	2.7108706653	10.8865088225	24	354.00001	821.812357466	16.00001	720.064161796	0.4307552774	0.022220256	0.0451977671	0.8761904774	0.051584408	0.1751552586	2.2025171499
Oh	ENST00000245796	0.00001	0.00001	0.3816500771	0.277563724	3.60277627662E-005	0.000026202	60	8.00001	20.1638457402	0.00001	14.6646167502	0.3967502084	6.81913490843E-007	0.00000125	0.7272728099	1.71874765625E-006	-0.8652651719	7.3076866864
Oh	ENST00000610322	186.00001	10.00001	11.2486957565	9.234782713	1.0828635942	16.5352511994	24	531.00001	653.361745191	13.00001	536.386962583	0.8127197742	0.0242362528	0.0244821276	0.8209647512	0.0298211678	-0.6791459375	4.1843847885
Oh	ENST00000279146	37.00001	1.00001	17.4864867568	15.9189191892	0.0628189633	2.1159201682	33	891.00001	525.654389779	93.00001	478.532358657	1.6950300945	0.1943442451	0.1043771144	0.9103554882	0.114655336	1.2954198474	2.4285714166
Oh	ENST00000376573	68.00001	2.00001	11.891110021	9.2714361652	0.2157173888	5.7185586442	30	277.00001	483.571807522	3.00001	377.03840405	0.5728208421	0.0079567757	0.0108303606	0.7796947593	0.0138905136	-1.6049678473	2.9048275461
Oh	ENST00000248378	96.00001	19.00001	12.6248091271	11.522205758	1.648990688	7.6040761515	36	455.00001	116.428795283	43.00001	106.260341991	3.9079680323	0.4046665877	0.0945055144	0.9126637593	0.1035491039	1.1570126078	6.1781794607
Oh	ENST00000300291	242.00001	4.00001	26.7802074414	23.381199326	0.1710780505	9.0365248488	21	1196.00001	870.994365832	22.00001	760.445673316	1.3731432222	0.0289304164	0.018394657	0.8730776032	0.0210687538	-1.6292992602	3.493274764
Oh	ENST00000290219	115.00001	6.00001	21.4822153264	14.7068888969	0.4079727563	5.3532658645	24	300.00001	906.728505236	4.00001	620.753268856	0.3308597979	0.0064438001	0.0133333662	0.6846076475	0.0194759236	-1.3362144063	3.8518738731
Oh	ENST00000257897	1.00001	0.00001	0.1893096325	0.1726058463	5.79354651821E-005	5.2824042111	30	3.00001	15.8389059206	2.00001	14.4413558092	0.1894076532	0.1384918443	0.6666677778	0.9117647318	0.7311839935	1.904594926	2.999995
Oh	ENST00000322776	135.00001	10.00001	25.7030076316	23.0639098872	0.4335782636	5.252304008	18	1752.00001	1990.55514658	134.00001	1786.17168793	0.8801564795	0.0750207894	0.0764840235	0.8973233879	0.0852357406	0.9336151205	2.7382222858
Oh	ENST00000324288	0.00001	0.00001	0.0810743449	0.0953815738	0.0001048421	0.0001233436	57	0.00001	4.8246346988	0.00001	5.6760403213	2.0726957841E-006	1.76179157193E-006	1	1.1764704844	0.850000075	0.929743465	0
Oh	ENST00000279263	43.00001	3.00001	6.8571429965	4.9198607666	0.6097753864	6.2708346642	24	173.00001	358.857150151	5.00001	257.472713449	0.4820860053	0.0194195724	0.0289017902	0.7174796805	0.0402823815	-0.2823339555	7.3106059815
Oh	ENST00000368885	187.00001	20.00001	21.757417164	16.7120419459	1.1967424486	8.5947706288	21	151.00001	1040.21175394	23.00001	798.994767318	0.1451627608	0.0287861835	0.1523179369	0.7681078053	0.198302811	2.0683586282	8.7977772196
Oh	ENST00000309422	43.00001	3.00001	11.0782611739	8.0652176957	0.3719688808	3.8814764632	42	44.00001	164.327540746	0.00001	119.634062486	0.2677579778	8.35882339214E-008	2.2727267562E-007	0.7280219855	3.12178313496E-007	-1.061391399	3.4459798562
Oh	ENST00000370179	125.00001	5.00001	11.48847947	10.3686638018	0.482223177	10.8804659769	18	824.00001	219.55760765	7.00001	198.156685991	3.7530014051	0.0353256312	0.0084951577	0.9025270776	0.0094126347	-2.4542547247	2.2496347075
Oh	ENST00000288723	36.00001	3.00001	2.1679559006	1.8198896022	1.6484571352	16.6055084381	18	67.00001	79.7326003425	3.00001	66.9314953702	0.8403088537	0.0448220973	0.044776262	0.8394495486	0.0533400275	0.1081739047	8.6425779562
Oh	ENST00000528838	184.00001	4.00001	34.198879958	33.1022413025	0.1208380413	5.3802934548	87	361.00001	624.620922451	7.00001	604.591510686	0.5779505569	0.0115780819	0.0193906089	0.9679334921	0.0200329971	-1.1554463938	12.9354632312
Oh	ENST00000554659	61.00001	1.00001	3.3862829826	2.6552046795	0.3766225661	18.0138548116	24	14.00001	98.4843967445	0.00001	77.2222027621	0.1421545997	1.29496435511E-007	7.14285204082E-007	0.7841059631	0.000000911	-0.8642332611	6.8494623223
Oh	ENST00000389879	102.00001	9.00001	2.5471056555	3.8019297191	2.3672215599	40.0454569992	33	509.00001	134.456304603	46.00001	200.69580517	3.7856165355	0.2292026481	0.0903732988	1.4926470407	0.0605456591	0.1162836148	2.8018119982
Oh	ENST00000333007	0.00001	0.00001	0.0646707234	0.0905389868	0.0001104497	0.0001546295	27	0.00001	4.704196321	0.00001	6.5858729677	2.12576162169E-006	1.51840159218E-006	1	1.3999996	0.7142859184	0.9889235244	3.068366129
Oh	ENST00000397588	49.00001	1.00001	10.3186814835	7.6813188462	0.130187279	4.7486696899	36	247.00001	468.353487335	4.00001	348.646527628	0.5273794616	0.0114729667	0.0161943718	0.7444089498	0.021754671	-1.1391650757	4.5099999248
Oh	ENST00000252936	65.00001	0.00001	17.2664093282	15.7776062394	6.33809707777E-007	3.7645354494	24	1477.00001	1948.2265192	43.00001	1780.23990401	0.7581254004	0.0241540536	0.0291130736	0.9137745978	0.0318602352	-0.5407770488	3.4530950641
Oh	ENST00000455036	53.00001	3.00001	7.1982411579	4.3180652693	0.6947579096	7.3629111386	24	538.00001	784.3083595	13.00001	470.489194971	0.6859547058	0.0276308365	0.0241635869	0.5998778277	0.0402808469	-0.1158507731	3.0672726715
Oh	ENST00000367619	5.00001	0.00001	4.5585954909	3.341916632	2.99229487179E-006	1.0968312521	18	791.00001	418.377763939	21.00001	306.713682007	1.8906358755	0.0684677966	0.0265486849	0.7331022546	0.0362141635	-0.4019213598	6.3093922303
Oh	ENST00000618527	65.00001	9.00001	28.1615735452	23.033972765	0.3907276479	2.3081100172	45	1318.00001	2235.40312674	54.00001	1828.38557148	0.5896028301	0.0295342573	0.0409711757	0.8179220784	0.0500917836	0.1377289286	8.9071274023
Oh	ENST00000382456	345.00001	25.00001	32.6599713917	29.9139168723	0.8357317468	10.5633898408	18	2551.00001	2360.59015448	98.00001	2162.11143616	1.0806619714	0.045326068	0.0384163111	0.9159198737	0.0419428732	-0.3602156247	2.4198027019
Oh	ENST00000295087	218.00001	8.00001	84.2799477488	60.5531358825	0.1321155359	2.5866177641	171	14.00001	265.654338226	1.00001	190.866317197	0.0527000993	0.0052393215	0.0714292347	0.7184761915	0.099417678	1.1984229626	17.9325842277
Oh	ENST00000559228	26.00001	1.00001	7.1444036025	4.047629409	0.2470606617	3.6392134944	48	134.00001	277.589848306	2.00001	157.267267661	0.4827266228	0.0127172681	0.0149254466	0.5665454577	0.0263446586	-0.8301641517	5.9695290308
Oh	ENST00000361523	167.00001	13.00001	47.3011366477	41.5625002841	0.3127821934	3.5305707608	60	451.00001	1065.85227913	11.00001	936.541673068	0.4231355684	0.0117453503	0.0243902655	0.8786786794	0.0277578893	-0.8336023337	9.7766254292
Oh	ENST00000373491	14.00001	2.00001	2.495667331	2.8249567591	0.7079789783	5.6097260344	30	94.00001	126.197578039	9.00001	142.848646785	0.7448638196	0.063003817	0.095744777	1.1319444399	0.0845843433	0.6378687683	2.8047944245
Oh	ENST00000619426	107.00001	1.00001	32.1384220052	28.2263909573	0.0354281921	3.3293485904	21	1274.00001	944.257446533	151.00001	829.318248603	1.3492083273	0.1820772788	0.1185243397	0.8782755716	0.1349511971	1.652377246	14.8419269574
Oh	ENST00000302850	11.00001	0.00001	9.9258632345	5.626985878	1.77715036377E-006	1.1082169621	33	583.00001	1247.6509302	17.00001	707.295073391	0.4672781432	0.0240352445	0.0291595364	0.5669014115	0.0514366974	-0.0009213921	6.8161431921
Oh	ENST00000255175	151.00001	3.00001	44.8174973638	33.4762459154	0.089616082	3.3692200342	45	1084.00001	1415.23697231	36.00001	1057.10545435	0.7659494708	0.0340552684	0.033210341	0.7469459003	0.0444615079	-0.04105616	5.251573128
Oh	ENST00000396478	0.00001	0.00001	1.5881786829	1.3646001413	7.32815401159E-006	6.29652072994E-006	24	184.00001	116.069392078	5.00001	99.7295269965	1.585258669	0.0501357035	0.0271739659	0.8592233078	0.0316261974	-0.6223876178	2.1056909999
Oh	ENST00000356860	52.00001	3.00001	6.0015867394	4.5113051051	0.66499825	8.664376982	51	528.00001	385.396011206	12.00001	289.696553319	1.3700193947	0.0414226882	0.0227272912	0.751685396	0.0302351108	-0.6833049746	30.8384749394
Oh	ENST00000307358	2.00001	0.00001	0.1345927509	0.1062574498	0.000094111	14.8597156001	18	22.00001	10.176707442	0.00001	8.0342438449	2.1618003785	1.24467220475E-006	4.54545247934E-007	0.789473795	5.75757233242E-007	-0.9479082094	9.3726933811
Oh	ENST00000225740	0.00001	0.00001	0.0809444857	0.121416661	0.000082361	0.0001235415	24	8.00001	4.5902268747	1.00001	6.8853364868	1.7428354237	0.1452376368	0.1250010937	1.4999991667	0.0833341088	-0.7488833134	25.6190458763
Oh	ENST00000354831	99.00001	3.00001	10.883183638	12.3804878742	0.2423175912	9.0966038333	27	2233.00001	1474.87292339	37.00001	1677.78537525	1.514028751	0.0220528862	0.0165696417	1.137579617	0.0145656984	-1.5705413612	2.8798751838
Oh	ENST00000543227	9.00001	1.00001	1.422625756	1.0998451494	0.909227995	6.3263370298	54	5.00001	55.7721986208	0.00001	43.1180033584	0.0896505808	2.31921685169E-007	0.000002	0.7731092628	0.000002587	-0.6393109702	11.6327042562
Oh	ENST00000399022	89.00001	4.00001	13.4716088801	10.5425867981	0.3794144717	6.606487079	21	437.00001	601.731863312	13.00001	470.902210315	0.726237111	0.0276066022	0.029748306	0.7825781532	0.0380132078	-0.5139962279	5.8173301654
Oh	ENST00000357365	189.00001	6.00001	10.9583334375	8.6458334375	0.6939770519	17.2471490376	24	102.00001	596.772575117	6.00001	470.837679284	0.1709193992	0.0127432664	0.0588236217	0.788973386	0.0745571685	0.6725111056	2.5864406604
Oh	ENST00000233468	121.00001	3.00001	21.3545457273	18.9545457273	0.1582739066	5.6662413495	21	525.00001	383.364939961	33.00001	340.279225675	1.3694523293	0.0969792086	0.0628571607	0.8876117511	0.0708160529	0.6175992307	1.9048727725
Oh	ENST00000453396	21.00001	1.00001	1.615154985	1.7497511964	0.5715155401	13.0018544316	45	37.00001	5.9940196112	2.00001	6.4935211067	6.1728209783	0.3080008469	0.0540543097	1.0833333102	0.049896287	-0.0478809992	6.2085426356
Oh	ENST00000349703	30.00001	0.00001	8.0300473781	7.5027783927	1.33283957977E-006	3.73596924	21	673.00001	1316.54538679	21.00001	1230.09838124	0.5111863341	0.0170718134	0.0312035805	0.9343379982	0.0333964589	-0.4383666428	3.0555336626
Oh	ENST00000361114	64.00001	4.00001	11.0583299496	11.2056232774	0.3569645258	5.7874932554	27	820.00001	585.681919555	38.00001	593.483010617	1.4000773844	0.0640288084	0.046341475	1.013319672	0.0457323353	-0.0484459794	3.274670455
Oh	ENST00000258796	86.00001	1.00001	6.5429752872	4.8347108244	0.2068396718	13.1438689931	39	654.00001	263.564466056	10.00001	194.752069362	2.4813663988	0.0513473876	0.0152905349	0.7389162594	0.0206931905	-1.039740081	4.7559561985
Oh	ENST00000396319	27.00001	1.00001	13.9439835166	15.301867334	0.0653521546	1.9363197015	33	866.00001	1001.00899851	21.00001	1098.4885974	0.865127098	0.0191171852	0.0242494339	1.0973813413	0.0220975453	-1.0238892975	5.0577900946
Oh	ENST00000330288	8.00001	1.00001	3.0820313672	2.2382813672	0.446775823	2.5956938937	18	84.00001	42.9772151758	11.00001	31.2115901758	1.9545242673	0.3524335011	0.1309524844	0.7262357519	0.1803167691	2.0376462826	5.1082250345
Oh	ENST00000377838	1.00001	0.00001	1.8442463063	1.5270829389	6.54843279657E-006	0.5422323453	27	125.00001	254.847517361	8.00001	211.020238701	0.4904894162	0.037911103	0.0640000749	0.8280254832	0.0772923976	0.2732993792	6.5994063324
Oh	ENST00000602728	69.00001	2.00001	42.584134976	36.9230772837	0.054166937	1.6203219823	30	808.00001	437.197119087	42.00001	379.076926779	1.8481366293	0.1107954798	0.0519802098	0.8670618131	0.0599498317	0.1435491129	14.7501675356
Oh	ENST00000486685	45.00001	0.00001	19.3542675845	13.3864737037	0.000000747	2.3250691251	51	165.00001	322.950621852	3.00001	223.370374938	0.5109140495	0.013430653	0.0181818777	0.6916548841	0.0262874999	-0.6513455324	11.136777777
Oh	ENST00000344843	221.00001	15.00001	86.130374896	68.4882112344	0.2190159405	2.5658777205	30	1374.00001	1289.08461094	56.00001	1025.04022814	1.0658726342	0.054632012	0.0407569211	0.7951690831	0.0512556662	-0.0896502526	2.39367112
Oh	ENST00000261318	24.00001	0.00001	6.2345312006	3.5683008341	2.80245429543E-006	3.8495292152	21	24.00001	183.176464323	2.00001	104.840076888	0.1310212537	0.0190767697	0.0833337153	0.5723446911	0.1456005735	1.6824428667	4.3597560533
Oh	ENST00000335181	554.00001	27.00001	211.994391859	225.832183059	0.1195578488	2.6132767246	33	10963.00001	10246.3956065	498.00001	10915.2221812	1.069937218	0.0456243585	0.0454255231	1.0652743267	0.0426420894	-0.622368787	4.3057304271
Oh	ENST00000334133	19.00001	1.00001	10.5030184105	8.5110667002	0.1174952606	1.8090047315	90	178.00001	202.591555117	1.00001	164.169019906	0.878615152	0.0060913442	0.0056180334	0.810344833	0.0069328922	-2.6031016262	5.620303193
Oh	ENST00000310931	43.00001	3.00001	113.972435008	106.22664634	0.0282415957	0.3772842968	42	3996.00001	10328.0735152	136.00001	9626.15752309	0.3869066195	0.0141281721	0.0340340365	0.9320380523	0.0365157156	-0.5943288597	3.3876701924
Oh	ENST00000378526	82.00001	1.00001	8.2607143179	7.6146428893	0.1313272355	9.9265035498	27	1385.00001	926.729765511	69.00001	854.250122654	1.4945025633	0.0807726077	0.0498195014	0.9217898836	0.0540464832	0.1768555053	5.9078590386
Oh	ENST00000256367	6.00001	0.00001	2.3346753019	1.6503739793	6.05923271055E-006	2.5699548006	105	37.00001	14.8529819206	2.00001	10.4995220778	2.4910829487	0.1904858131	0.0540543097	0.706896577	0.0764670695	0.3739687686	4.2334628703
Oh	ENST00000221232	59.00001	1.00001	1.9807153612	3.0778401858	0.3249064083	29.7872229182	21	1056.00001	213.25702055	26.00001	331.380793342	4.9517713756	0.0784596166	0.0246212214	1.5539033251	0.0158447575	-1.5363053818	4.3951715096
Oh	ENST00000403825	202.00001	46.00001	89.081660083	103.315284537	0.4452391551	2.267582461	159	325.00001	759.155027751	196.00001	880.454154389	0.4281075645	0.2226123973	0.6030769353	1.1597817603	0.5199917398	3.6464153501	6.3345337115
Oh	ENST00000362074	8.00001	0.00001	0.0576308324	0.1344718143	0.000074365	138.814756975	18	0.00001	2.2732161686	0.00001	5.3041660085	4.39905370111E-006	1.88531052458E-006	1	2.3333311111	0.4285718367	0.9097686852	35.9293666941
Oh	ENST00000228506	162.00001	13.00001	57.9535165228	32.7002717296	0.3975505191	2.7953439191	48	1033.00001	1060.0664064	43.00001	598.142470386	0.9744672633	0.071889244	0.0416263404	0.5642500005	0.0737728672	0.1604869809	4.966804971
Oh	ENST00000280557	91.00001	3.00001	25.0834237053	22.8732395233	0.1311580722	3.6278943046	24	358.00001	622.905022015	12.00001	568.018781495	0.5747264789	0.0211260796	0.0335195801	0.9118866624	0.0367584936	-0.5844562998	4.1982916327
Oh	ENST00000334295	31.00001	0.00001	14.8310175856	12.3267992233	8.11240600161E-007	2.0902146344	87	541.00001	153.765262784	12.00001	127.80198735	3.5183499849	0.0938953317	0.0221811641	0.8311499297	0.02668732	-0.8429182689	11.3465630965
Oh	ENST00000396203	16.00001	2.00001	62.4727082424	49.6179047489	0.0403082317	0.2561119959	75	352.00001	538.931229771	5.00001	428.037124967	0.6531445768	0.0116812531	0.0142045735	0.7942332923	0.0178846362	-1.4065712024	5.226762449
Oh	ENST00000373279	18.00001	0.00001	1.8000002535	2.1802819437	4.58656277417E-006	10.0000041471	27	128.00001	24.3333367606	6.00001	29.474181831	5.2602736427	0.2035683309	0.0468750745	1.2112675759	0.0386991903	-0.3663225029	2.2982455636
Oh	ENST00000369046	22.00001	1.00001	1.9025816318	1.9990258597	0.5002486562	11.5632410367	18	126.00001	167.638581554	13.00001	176.13638964	0.7516170134	0.0738064975	0.1031746744	1.0506912431	0.0981969489	0.9569172902	2.6382488175
Oh	ENST00000274605	0.00001	0.00001	0.4263158339	0.2753289918	3.63201853008E-005	2.345678768E-005	27	18.00001	25.8000026875	1.00001	16.6625026875	0.6976747335	0.0600155942	0.0555560802	0.6458333702	0.0860223129	0.116111621	7.419847045
Oh	ENST00000370966	113.00001	4.00001	8.9797209355	8.0043611448	0.4997288263	12.5839111051	21	77.00001	676.89991623	1.00001	603.376366295	0.1137539068	0.0016573569	0.0129871412	0.8913819485	0.0145696704	-1.5368905854	2.393870588
Oh	ENST00000528372	2.00001	0.00001	1.6419966196	1.4561102169	6.86761200091E-006	1.2180353943	18	153.00001	187.917390912	12.00001	166.643724819	0.8141876026	0.0720099723	0.0784314328	0.8867924571	0.0884439557	0.5505149384	2.92792784
Oh	ENST00000333479	29.00001	4.00001	7.2980645419	7.4167742194	0.5393193701	3.9736576504	18	1006.00001	2687.71499158	136.00001	2731.43312778	0.3742956426	0.0497907156	0.1351888754	1.0162659123	0.1330251008	1.5630465455	18.7760413407
Oh	ENST00000303319	157.00001	14.00001	42.8523680223	36.0334265181	0.3885284124	3.6637417544	48	528.00001	794.554323747	21.00001	668.119783357	0.6645234872	0.0314315045	0.0397727455	0.8408736362	0.0472993132	-0.0766233926	3.2431192611
Oh	ENST00000409302	50.00001	0.00001	10.8575138083	10.5155448964	0.000000951	4.6051067383	66	13.00001	69.915808614	0.00001	67.7137360751	0.1859380626	1.47680523622E-007	7.69230177515E-007	0.9685039395	7.9424579101E-007	-0.84459773	23.0156706854
Oh	ENST00000367837	48.00001	5.00001	18.6328354754	15.7279073726	0.3179068824	2.5760979891	51	901.00001	750.428315027	19.00001	633.433759673	1.2006476728	0.0299952595	0.0210876912	0.8440962941	0.0249825658	-0.7689447693	6.5072886108
Oh	ENST00000282096	31.00001	2.00001	10.795260158	7.7024359315	0.259659414	2.8716315815	72	239.00001	500.480255658	2.00001	357.093488048	0.4775413361	0.0056008022	0.0083682423	0.7135016497	0.0117284134	-1.8994331597	13.7950905678
Oh	ENST00000281543	17.00001	0.00001	8.3149022994	7.5138234053	1.33088036019E-006	2.044523121	33	454.00001	506.201173318	15.00001	457.432461247	0.896876645	0.032791748	0.0330396689	0.9036574496	0.0365621607	-0.3105659941	4.8205127896
Oh	ENST00000291672	0.00001	0.00001	0.117238515	0.0651325662	0.000153533	8.52962015227E-005	30	6.00001	3.9939254103	1.00001	2.2188494225	1.5022839396	0.450688537	0.1666680556	0.5555560494	0.3000022333	0.3709680447	4.6155641664
Oh	ENST00000308025	112.00001	18.00001	12.9901478571	11.6231527833	1.5486340355	8.621919568	24	562.00001	1332.57266768	40.00001	1192.34175635	0.4217406102	0.033547437	0.0711743938	0.894766781	0.0795451902	0.7680154095	3.8097686235
Oh	ENST00000432176	39.00001	0.00001	2.2723685414	1.6904454937	5.91560037723E-006	17.1627133933	27	252.00001	131.713213603	4.00001	97.9832295401	1.9132477533	0.0408234146	0.0158730549	0.7439134378	0.0213372338	-1.0708302067	5.1037310164
Oh	ENST00000510164	97.00001	4.00001	21.1858412148	16.7256642237	0.2391540298	4.57853002	63	27.00001	308.371688793	3.00001	243.451334811	0.0875567083	0.0123228324	0.1111114403	0.7894736892	0.1407411569	1.6194742355	14.7544483723
Oh	ENST00000345254	93.00001	5.00001	15.470336217	16.8204377284	0.2972580191	6.0115054189	45	1641.00001	1128.99075859	197.00001	1227.51816667	1.4535105779	0.1604864314	0.1200487561	1.0872703406	0.1104129779	1.2990976444	12.2636009966
Oh	ENST00000378863	97.00001	12.00001	24.1076303209	18.9709451263	0.6325467667	4.023622758	81	262.00001	269.350684449	18.00001	211.959325177	0.97270965	0.0849220009	0.0687023256	0.7869269967	0.0873045732	1.0132477786	11.7633821825
Oh	ENST00000449549	3.00001	0.00001	0.6479260439	0.3332191532	3.00102797297E-005	4.6301735026	27	13.00001	28.9886911484	1.00001	14.9084717449	0.4484510851	0.0670766271	0.076923787	0.5142857837	0.1495740101	0.4292834523	8.7189727715
Oh	ENST00000315480	17.00001	1.00001	3.7900404845	3.1009422342	0.3224858525	4.485442852	48	205.00001	216.663981032	7.00001	177.270531054	0.9461656203	0.0394877251	0.0341463886	0.8181818233	0.0417344747	-0.279469246	7.2257550521
Oh	ENST00000374492	47.00001	1.00001	11.6216781761	8.2073999062	0.121842485	4.0441672268	42	149.00001	480.362697947	3.00001	339.239196123	0.3101823073	0.0088433472	0.020134294	0.7062146948	0.02851016	-0.7620819452	3.6294846469
Oh	ENST00000246151	12.00001	1.00001	21.9937618465	23.371179189	0.0427881705	0.545609709	24	794.00001	581.91828219	65.00001	618.362449376	1.3644527665	0.1051163603	0.0818639914	1.0626276374	0.0770392078	0.5902825512	6.3554454816
Oh	ENST00000451237	0.00001	0.00001	1.4344755726	1.3388439315	7.46913046738E-006	6.97118876818E-006	162	2.00001	10.0590385832	0.00001	9.3884364581	0.1988271527	1.06514008426E-006	0.000005	0.9333333778	5.35711581646E-006	-0.5795742845	8.5287346519
Oh	ENST00000281382	46.00001	2.00001	3.1093298397	2.4795922303	0.806588267	14.7941879351	54	47.00001	37.9453400802	0.00001	30.2602088848	1.2386240287	3.30466985144E-007	2.12765912177E-007	0.7974683801	2.6680169082E-007	-1.0431820254	4.4409825977
Oh	ENST00000436390	109.00001	4.00001	105.784615846	82.938462	0.0482286493	1.0303956689	105	436.00001	1337.92352232	38.00001	1048.97407177	0.3258781259	0.0362258811	0.0871559842	0.7840314146	0.111163893	1.3419794394	4.8499577295
Oh	ENST00000310473	103.00001	17.00001	2.8892575059	3.7823005727	4.4946216393	35.6493008287	111	142.00001	24.1812632702	40.00001	31.6554705584	5.8723156195	1.2636049724	0.2816901914	1.3090908529	0.2151800166	1.5089379265	8.4941921809
Oh	ENST00000619594	107.00001	2.00001	7.6763681141	5.7206055995	0.3496150827	13.9388846926	21	162.00001	110.393484307	12.00001	82.2677567171	1.467478004	0.1458652877	0.0740741312	0.7452229381	0.0993986195	1.0576149187	3.2438642241
Oh	ENST00000317269	49.00001	0.00001	7.3351351892	4.545946	2.19976216172E-006	6.6801781748	18	238.00001	859.025832156	10.00001	532.380787111	0.2770580361	0.0187835667	0.042016847	0.6197494501	0.0677965055	0.4503359663	2.8252212264
Oh	ENST00000376810	38.00001	2.00001	4.7287438865	3.3809654992	0.5915499583	8.035962808	21	374.00001	228.781132792	10.00001	163.574330817	1.6347502324	0.0611343476	0.0267379939	0.7149817331	0.0373967511	-0.1854494862	7.5150501044
Oh	ENST00000269468	65.00001	8.00001	4.2915005155	3.551396189	2.2526379976	15.1462197815	18	449.00001	433.20313537	22.00001	358.493715302	1.0364652823	0.0613679098	0.048997794	0.8275418298	0.0592088427	0.3826850964	2.6838638564
Oh	ENST00000277165	81.00001	1.00001	20.2139508499	15.3692849648	0.0650654863	4.0071340136	45	902.00001	1507.5115345	18.00001	1146.20711871	0.5983370537	0.0157039768	0.019955665	0.7603305796	0.0262460376	-0.7931092596	3.6166666393
Oh	ENST00000336308	78.00001	1.00001	5.5356473781	3.6543152955	0.2736518114	14.0904946925	21	250.00001	352.436216402	8.00001	232.658073813	0.7093482405	0.0343852671	0.0320000387	0.6601423548	0.0484744517	-0.024878798	11.5457141208
Oh	ENST00000394264	33.00001	0.00001	1.392621917	1.2819499802	7.80061636894E-006	23.6963167083	21	163.00001	57.2301292556	5.00001	52.682039664	2.8481503034	0.0949091955	0.0306749061	0.920529804	0.0333230993	-0.5163504846	3.5119047271
Oh	ENST00000256015	210.00001	25.00001	13.3000001667	12.1333335	2.0604403563	15.7894742382	78	419.00001	87.8141036645	14.00001	80.1111122115	4.7714432251	0.174757404	0.0334129109	0.9122807029	0.0366256907	-0.3651384205	16.8693360303
Oh	ENST00000313093	0.00001	0.00001	0.4324831313	0.3047040534	3.28187298127E-005	2.31222891172E-005	42	22.00001	35.1135113737	1.00001	24.7390671893	0.6265397318	0.0404223002	0.0454549793	0.7045455217	0.0645167387	-0.9726340423	59.2558001731
Oh	ENST00000224337	0.00001	0.00001	0.0184979428	0.0184979428	0.0005406007	0.0005406007	33	4.00001	0.7679448991	0.00001	0.7679448991	5.2087200588	1.30217675925E-005	0.0000025	1	0.0000025	-0.6569508278	3.3333222223
Oh	ENST00000261593	35.00001	1.00001	23.3714287143	20.4428572857	0.0489173302	1.4975554309	51	223.00001	337.740058087	7.00001	295.419329796	0.6602711306	0.0236951658	0.031390178	0.8746943773	0.0358870238	-0.4349934263	4.808149365
Oh	ENST00000318430	0.00001	0.00001	0.1509866742	0.0503292269	0.0001986917	0.000066231	222	0.00001	1.4826619361	0.00001	0.4942239402	6.74462583596E-006	2.02337426167E-005	1	0.3333355555	2.9999800002	1.2327714867	145.998540015
Oh	ENST00000618655	31.00001	2.00001	3.1675271234	2.1398405913	0.9346537346	9.7868175369	30	207.00001	131.346791384	6.00001	88.7320565181	1.5759807135	0.0676194178	0.0289855542	0.67555557	0.042906247	-0.3273330505	2.5426573249
Oh	ENST00000356998	0.00001	0.00001	0.5373568103	0.2442533621	4.09410945884E-005	1.86096087506E-005	102	0.00001	5.0838168822	0.00001	2.3108283764	0.000001967	4.32745248499E-006	1	0.4545459504	2.1999976	1.1794798298	25.7288091985
Oh	ENST00000299314	90.00001	0.00001	7.6576039712	4.3445010068	2.30176031361E-006	11.7530248806	24	263.00001	1202.88195715	3.00001	682.448699825	0.2186415786	0.0043959495	0.0114068817	0.5673446973	0.0201057342	-1.2487803949	1.6377816149
Oh	ENST00000346246	57.00001	1.00001	1.1800515523	1.1969094311	0.8354934585	48.3029829396	18	15.00001	110.269261723	0.00001	111.844536834	0.1360307466	8.94098208373E-008	6.66666222223E-007	1.0142857138	6.57276557451E-007	-0.9346774064	3.8327813935
Oh	ENST00000316763	14.00001	0.00001	6.295665743	5.6888545975	1.75782309577E-006	2.2237537016	21	357.00001	426.906096099	66.00001	385.75852128	0.8362495014	0.1710915154	0.1848739724	0.9036144595	0.2045938624	2.1383504242	2.3188405517
Oh	ENST00000381334	95.00001	4.00001	12.0902490716	10.2930499015	0.3886127084	7.8575726139	21	810.00001	560.757266463	11.00001	477.401457334	1.4444752809	0.0230414253	0.0135802591	0.8513513527	0.0159514154	-1.4079508021	3.7463751352
Oh	ENST00000375040	5.00001	1.00001	1.174797439	1.105691748	0.9044202436	4.2560613719	102	0.00001	5.5514937805	3.00001	5.2249355149	1.80131697799E-006	0.5741716795	300001	0.9411765052	318751.050781	2.9462497371	8.2967862326
Oh	ENST00000274963	0.00001	0.00001	0.2393305351	0.212738283	4.70061140819E-005	4.17832183204E-005	81	0.00001	5.8118908963	0.00001	5.1661259586	1.72061041381E-006	1.93568644669E-006	1	0.8888890123	1.1249998438	1.1901622108	25.9997400026
Oh	ENST00000229238	312.00001	22.00001	56.9367911669	41.4262563209	0.531064401	5.4797610404	30	1090.00001	732.586713015	26.00001	533.017831329	1.4878784868	0.0487788747	0.02385322	0.7275832633	0.032784179	-0.754764768	3.9942014176
Oh	ENST00000331373	486.00001	17.00001	61.3351211421	27.5260058606	0.6175981392	7.9236822387	93	713.00001	693.81233808	20.00001	311.369442638	1.0276554205	0.064232411	0.0280505045	0.4487804923	0.062503841	0.3708060492	30.0907715169
Oh	ENST00000355716	0.00001	0.00001	0.1001760808	0.0333922496	0.0002994707	9.98242286561E-005	57	0.00001	1.4956113122	0.00001	0.4985404277	6.68622918143E-006	2.0058553821E-005	1	0.3333355555	2.9999800002	1.358162229	3.3677417182
Oh	ENST00000439853	80.00001	1.00001	5.908884216	4.2398983985	0.2358570669	13.5389368071	63	76.00001	226.132061026	8.00001	162.260238709	0.3360868408	0.0493035759	0.1052632756	0.7175463664	0.1466989181	1.3282081591	12.0027528424
Oh	ENST00000262630	0.00001	0.00001	2.75510204082E-007	0.0275512959	0.0003629593	36.2962962963	54	0.00001	7.46428571429E-006	0.00001	0.7464360357	1.3397129187	0.000013397	1	100001	9.999900001E-006	-1.4532974712	1700000
Oh	ENST00000369563	75.00001	4.00001	11.3832489213	8.8324875	0.4528746856	6.5886295309	75	176.00001	242.53909035	2.00001	188.190867	0.7256562633	0.0106275614	0.0113636925	0.7759197362	0.0146454485	-1.689462774	16.3600525087
Oh	ENST00000400334	19.00001	4.00001	13.2266608101	10.322935496	0.3874876484	1.4364933276	57	274.00001	648.570473059	11.00001	506.186047565	0.4224675982	0.02173116	0.0401460204	0.7804642188	0.0514386431	0.0576635657	8.5455240683
Oh	ENST00000360845	77.00001	8.00001	28.4023421593	22.9081969602	0.3492204128	2.7110443768	51	977.00001	973.476354792	86.00001	785.167221302	1.0036196618	0.1095308205	0.0880245743	0.8065601362	0.1091357859	1.118428866	3.3434894989
Oh	ENST00000328557	3.00001	0.00001	0.1918881552	0.2398600741	0.000041691	15.6341593699	123	6.00001	3.2418177769	0.00001	4.052270195	1.850816552	2.46775252359E-006	1.66666388889E-006	1.249999375	1.33333177778E-006	-0.8092340058	13.5294097751
Oh	ENST00000394987	89.00001	8.00001	12.7584651738	9.296614158	0.8605294211	6.9757614876	72	837.00001	556.942445018	19.00001	405.823031926	1.5028483059	0.0468184615	0.0227001312	0.7286624238	0.0311531519	-0.5534859198	9.0349281864
Oh	ENST00000305352	10.00001	3.00001	4.1735993709	2.8411827329	1.0559018135	2.3960157915	57	89.00001	84.0577557511	7.00001	57.2224171468	1.0587959339	0.1223298551	0.0786517889	0.6807511887	0.1155367632	0.8748176479	8.028985378
Oh	ENST00000398013	319.00001	25.00001	73.5000005	53.9000005	0.4638220736	4.340136161	114	272.00001	697.605267904	7.00001	511.577197728	0.3899053269	0.0136831939	0.0257353299	0.7333333351	0.0350936316	-0.2848774482	3.326605502
Oh	ENST00000259089	0.00001	0.00001	4.25940138143E-007	4.25940138143E-007	23.4774774775	23.4774774775	111	0.00001	5.82118188795E-006	0.00001	5.82118188795E-006	1.7178642057	1.7178642057	1	1	1	0.0753371764	0
Oh	ENST00000326974	306.00001	29.00001	210.553169686	166.805657899	0.173855074	1.4533146685	93	829.00001	2599.0864387	29.00001	2059.06338998	0.31895823	0.0140840783	0.0349819176	0.7922258219	0.0441564975	-0.2798092205	19.2486701945
Oh	ENST00000261439	13.00001	1.00001	13.2052632947	9.8252632947	0.1017794608	0.9844567056	78	297.00001	593.559655274	2.00001	441.632988607	0.5003709524	0.0045286698	0.0067340402	0.7440414534	0.009050625	-2.2322870435	11.3461529734
Oh	ENST00000286835	64.00001	4.00001	6.1581208133	9.25757228	0.4320798022	10.3927824641	57	1539.00001	371.972104562	41.00001	559.189848421	4.1374070559	0.0733203761	0.0266406821	1.5033112472	0.0177213349	-1.4634586033	12.7810650131
Oh	ENST00000380338	22.00001	3.00001	11.9521560248	10.5345541347	0.2847780705	1.8406729258	60	362.00001	339.839636305	18.00001	299.532489229	1.0652083257	0.0600936815	0.0497237832	0.8813936258	0.0564149566	0.3485354509	14.596566367
Oh	ENST00000612662	460.00001	61.00001	75.7395570644	74.6827260519	0.8167887439	6.0734446811	312	20.00001	236.443360836	56.00001	233.144151201	0.0845868961	0.2401947881	2.7999991	0.9860465118	2.8396217282	6.0414117041	10.797181221
Oh	ENST00000398844	38.00001	3.00001	8.5499286411	6.9872996523	0.4293518454	4.444482708	51	771.00001	550.045409241	11.00001	449.516277633	1.4017024723	0.0244707712	0.0142671983	0.8172348502	0.0174578926	-1.2104392202	26.6330704467
Oh	ENST00000361835	0.00001	0.00001	0.0512060649	0.0128016122	0.0007811516	0.0001952894	69	0.00001	2.1766288182	0.00001	0.5441612857	4.59426059072E-006	1.83769045364E-005	1	0.250001875	3.9999700003	1.2344987476	0
Oh	ENST00000368875	68.00001	10.00001	10.9063520713	9.1513934974	1.0927308505	6.2348995847	30	712.00001	903.773041642	32.00001	758.345474482	0.7878084178	0.0421971398	0.0449438336	0.8390883989	0.0535626922	0.2282573168	4.7257360702
Oh	ENST00000260952	352.00001	23.00001	200.968164453	166.879593024	0.1378239818	1.751521247	291	286.00001	1333.57225278	5.00001	1107.36939564	0.2144615782	0.0045152142	0.0174825518	0.8303782516	0.0210537208	-1.0842411045	9.102088708
Oh	ENST00000377223	218.00001	14.00001	41.3818505392	34.9425695221	0.4006577133	5.2680101822	108	220.00001	219.170541745	5.00001	185.066201543	1.0037845791	0.027017413	0.0227273171	0.8443935945	0.026915549	-0.8387707217	10.5709023819
Oh	ENST00000282570	80.00001	11.00001	6.4373659055	4.5146744238	2.4365012773	12.4274448857	51	48.00001	195.266765801	1.00001	136.945124188	0.2458176116	0.007302268	0.0208335373	0.7013232571	0.0297060409	-0.7362680701	5.2102563912
Oh	ENST00000373087	21.00001	3.00001	2.360656006	3.0849481073	0.9724669251	8.8958365586	72	32.00001	58.9836132601	1.00001	77.0808561811	0.5425237321	0.0129735196	0.0312503027	1.306818147	0.0239132758	-1.1423530395	9.4668505672
Oh	ENST00000298875	98.00001	5.00001	14.6568469919	11.9433832405	0.4186426827	6.6862954941	54	1602.00001	637.301421057	21.00001	519.315997198	2.5137242082	0.0404378261	0.0131086204	0.8148671571	0.0160868189	-1.6084085935	2.8383215879
Oh	ENST00000370267	227.00001	22.00001	225.081968033	167.540984426	0.1313112136	1.0085215266	135	681.00001	883.655133758	9.00001	657.753494414	0.7706626533	0.0136829528	0.0132158735	0.744355427	0.017754789	-1.6675508442	7.6916221918
Oh	ENST00000392038	584.00001	20.00001	73.5962265849	58.3471699811	0.3427760079	7.9351895756	90	1101.00001	1181.62830461	31.00001	936.796229142	0.9317650954	0.0330915188	0.0281562304	0.792801108	0.0355148727	-0.6202789589	6.6449382607
Oh	ENST00000494664	95.00001	12.00001	39.5150378822	32.2518799875	0.3720716437	2.4041482709	69	844.00001	490.788224131	44.00001	400.577697815	1.7196826829	0.1098413872	0.0521327127	0.8161925615	0.0638730553	0.4899851267	8.3440603086
Oh	ENST00000342665	80.00001	8.00001	7.7695465724	5.4971923607	1.4552901691	10.2966124541	63	357.00001	116.789850857	12.00001	82.6323994536	3.0567725481	0.1452216089	0.0336134724	0.7075306531	0.0475081501	0.1043528503	6.2285505432
Oh	ENST00000316495	34.00001	12.00001	19.8837230233	25.1162811628	0.4777781361	1.7099418434	180	10.00001	48.2732608953	2.00001	60.9767492674	0.2071542261	0.032799551	0.2000008	1.263157867	0.1583339701	1.4256346047	4.677247794
Oh	ENST00000265070	247.00001	15.00001	69.3296584675	63.5986772106	0.2358541193	3.562688977	69	828.00001	900.280782418	32.00001	825.861083778	0.9197130786	0.0387474487	0.0386473546	0.9173372351	0.0421299312	-0.3532562168	7.0189057029
Oh	ENST00000253727	47.00001	5.00001	10.5945949099	8.639639955	0.5787289778	4.4362253016	63	90.00001	232.408415325	18.00001	189.52353044	0.3872493596	0.094975067	0.2000000889	0.815476196	0.2452555818	2.0050181134	6.7191976837
Oh	ENST00000309534	81.00001	9.00001	38.7483872703	31.5991102959	0.2848184622	2.0904098391	78	376.00001	249.877420474	12.00001	203.773749729	1.5047378402	0.0588888903	0.0319149194	0.8154948508	0.0391356479	-0.4911892128	5.1152629123
Oh	ENST00000261558	128.00001	22.00001	9.4700520695	8.8484281452	2.486318433	13.5162942147	114	154.00001	122.279970582	29.00001	114.25338798	1.2594050298	0.2538218823	0.188311741	0.934358975	0.2015411058	2.0410029985	5.3906215804
Oh	ENST00000369842	221.00001	3.00001	47.7563457868	47.147208731	0.0636307022	4.6276574633	84	1215.00001	434.355335489	47.00001	428.815088934	2.7972489589	0.1096043754	0.0386831355	0.9872448981	0.0391829176	-0.1278981312	4.3912355898
Oh	ENST00000366647	124.00001	2.00001	98.7741207491	85.187287605	0.0234777988	1.2553896614	114	611.00001	1769.26977693	18.00001	1525.8986078	0.3453402177	0.0117963342	0.0294599177	0.8624454154	0.0341585881	-0.3233540759	6.4197508127
Oh	ENST00000334351	398.00001	25.00001	117.845613291	132.00124243	0.1893922325	3.3773001717	171	4.00001	288.756210344	1.00001	323.441640807	0.0138525505	0.0030917788	0.250001875	1.1201201194	0.2231920226	2.3502825049	3.0495492404
Oh	ENST00000507416	213.00001	16.00001	56.3116453253	47.8202069692	0.3345867995	3.7825215152	87	72.00001	144.986305205	4.00001	123.123291507	0.4965986953	0.0324878417	0.0555556867	0.8492063532	0.0654207149	0.5268268819	26.7502954034
Oh	ENST00000301998	39.00001	1.00001	6.4495115201	5.0401738437	0.1984078389	6.0469711355	33	130.00001	233.159613438	3.00001	182.209921075	0.5575580097	0.016464581	0.0230769982	0.7814814855	0.029529808	-0.5912616957	2.2392637693
Oh	ENST00000329565	5.00001	0.00001	2.4492754801	1.3541667844	7.38461474247E-006	2.041424103	39	16.00001	16.7053148128	0.00001	9.2361119143	0.9577796156	1.08270667277E-006	0.000000625	0.5528846369	1.13043403214E-006	-0.8286401302	4.4701986015
Oh	ENST00000368494	62.00001	8.00001	8.9114628529	7.1022241873	1.1264091064	6.9573324856	30	17.00001	261.699959112	4.00001	208.568650302	0.0649599261	0.0191783856	0.2352945675	0.7969762434	0.2952341044	2.8438688739	6.2747662379
Oh	ENST00000331495	4.00001	0.00001	0.3335772641	0.3862473446	2.5890145631E-005	11.9912548927	36	23.00001	30.5964479444	0.00001	35.4274647696	0.7517215738	2.82266881501E-007	4.3478241966E-007	1.1578946953	3.75493921363E-007	-1.0299622912	5.7037015912
Oh	ENST00000340258	2.00001	0.00001	0.2768471354	0.1961000879	5.09943677624E-005	7.2242394601	42	7.00001	6.3608925158	0.00001	4.5056329717	1.1004760704	2.21944398551E-006	1.42856938776E-006	0.7083334549	2.01680349552E-006	-0.6889616499	3.1217104236
Oh	ENST00000244519	6.00001	1.00001	0.2378415789	0.2938042705	3.4036605334	25.2269179618	42	11.00001	9.9327173684	8.00001	12.2698259627	1.10745223	0.6520068031	0.7272729752	1.2352939792	0.5887448554	0.9603409023	3.5321542841
Oh	ENST00000264414	73.00001	6.00001	9.3422341611	9.3066311349	0.6447026763	7.8139777639	48	1202.00001	448.81649949	21.00001	447.10607077	2.6781546832	0.0469687427	0.01747089	0.9961890244	0.0175377259	-1.1863650772	6.0433162271
Oh	ENST00000233575	128.00001	20.00001	25.875734002	21.8542075832	0.9151560368	4.9467199651	30	1144.00001	1217.88454703	34.00001	1028.60470358	0.9393337101	0.0330544959	0.0297202882	0.8445830979	0.0351893002	-0.281013959	7.7810451894
Oh	ENST00000618852	10.00001	0.00001	4.346723129	4.3805497674	2.28281848875E-006	2.3005859134	48	70.00001	135.472870853	2.00001	136.527134419	0.5167086927	0.0146491758	0.0285715673	1.007782101	0.0283509375	-0.6482801328	3.3597883499
Oh	ENST00000263390	35.00001	5.00001	2.1209830907	2.0586012382	2.4288385275	16.5017864371	33	137.00001	115.818531197	8.00001	112.412103976	1.1828850581	0.0711668025	0.0583942293	0.9705882367	0.0601637513	0.1727581284	3.4228186771
Oh	ENST00000296490	173.00001	24.00001	19.0090846541	14.6163522991	1.6419972308	9.1009121769	42	256.00001	425.894015702	7.00001	327.475893177	0.6010885351	0.0213756498	0.027343788	0.7689140516	0.0355615663	-0.4877630585	2.7768153285
Oh	ENST00000368521	220.00001	17.00001	115.264637231	88.5263468326	0.1920333393	1.9086513894	39	941.00001	2249.13817776	31.00001	1727.3987164	0.4183824806	0.0179460652	0.0329436872	0.7680269418	0.0428939213	-0.6139554475	6.3318518466
Oh	ENST00000222803	18.00001	2.00001	4.0318549052	3.3665323246	0.5940860824	4.4644488512	33	165.00001	77.5826625706	15.00001	64.7802432157	2.1267639513	0.2315522334	0.090909146	0.8349835011	0.10887538	1.1892509043	29.4222775169
Oh	ENST00000310574	60.00001	3.00001	12.7688023398	10.0055711421	0.2998339582	4.6989536217	36	629.00001	676.391835057	40.00001	530.017337998	0.9299343626	0.0754692481	0.0635930197	0.7835951153	0.081155457	0.8146040294	10.8318936517
Oh	ENST00000388948	0.00001	0.00001	0.2956590458	0.197106054	5.07341088648E-005	3.38227432697E-005	54	11.00001	33.1083379572	0.00001	22.0722279325	0.3322428934	4.53058025252E-007	9.09090082645E-007	0.666666746	1.36363496163E-006	-0.7977157738	46.313781633
Oh	ENST00000271843	358.00001	14.00001	150.5734269	115.426573753	0.1212893145	2.3775776202	42	847.00001	1577.43590085	11.00001	1209.23077265	0.5369473394	0.0090967004	0.0129870246	0.7665799745	0.016941513	-1.9406700543	13.698099606
Oh	ENST00000341114	104.00001	19.00001	1.6270755172	1.7598979949	10.7960859409	63.9183669707	39	4.00001	73.8024766667	0.00001	79.8271680247	0.0541988586	1.2527063464E-007	0.0000025	1.0816326447	2.31131499423E-006	-1.1862938517	3.8909444891
Oh	ENST00000335791	22.00001	0.00001	10.245417534	7.3270260497	1.36481021525E-006	2.1473024332	105	53.00001	88.5984678179	1.00001	63.3613300296	0.5982045887	0.0157826548	0.0188681096	0.7151515324	0.026383373	-0.9575706373	5.0106651057
Oh	ENST00000292577	416.00001	9.00001	26.14456535	21.4866256801	0.4188656764	15.9115290092	132	2.00001	184.596476562	0.00001	151.708599499	0.0108344972	6.59158415081E-008	0.000005	0.8218390856	6.08388562659E-006	-0.4928302887	3.610065123
Oh	ENST00000305103	70.00001	11.00001	21.6270950255	18.843409665	0.5837590009	3.2366811131	147	53.00001	99.1609663074	7.00001	86.3976742462	0.5344846059	0.0810208152	0.1320756355	0.8712871351	0.1515868078	1.6921057867	11.3900087393
Oh	ENST00000323557	220.00001	11.00001	81.1263902721	74.2232305295	0.1482017142	2.7118180565	195	366.00001	546.251027832	14.00001	499.769752232	0.6700216409	0.0280129198	0.0382513924	0.9149085801	0.0418089777	-0.0354935026	23.8536677128
Oh	ENST00000373095	2.00001	0.00001	3.0231663707	2.0501933977	4.87758862715E-006	0.6615613416	144	11.00001	24.2273193871	3.00001	16.4300220898	0.4540333094	0.1825931812	0.2727279339	0.6781609565	0.4021581179	1.9008827343	9.5510905907
Oh	ENST00000262644	179.00001	11.00001	68.3053203375	38.855396737	0.2831012143	2.6205866412	111	808.00001	663.976942741	10.00001	377.702460174	1.2169097419	0.0264758932	0.0123762498	0.5688487594	0.0217566614	-1.3863373451	8.1943917691
Oh	ENST00000346473	51.00001	19.00001	21.5562925497	38.0132461921	0.4998260318	2.3658989542	105	30.00001	104.49669436	56.00001	184.273736302	0.2870905169	0.3038957755	1.8666663778	1.7634408192	1.0585364462	4.4181685022	3.8166238136
Oh	ENST00000297661	30.00001	9.00001	14.7597809397	13.8372946508	0.650416879	2.0325511688	87	157.00001	255.836202954	15.00001	239.846440614	0.6136739374	0.0625400567	0.0955414589	0.9375000013	0.1019108893	1.0085468811	8.0172004626
Oh	ENST00000345146	36.00001	3.00001	27.3929474811	31.6624688917	0.094749718	1.3142072435	90	592.00001	378.631407406	29.00001	437.645681125	1.5635258946	0.0662636723	0.0489865026	1.1558620668	0.0423809241	-0.0200800963	8.943856056
Oh	ENST00000322428	329.00001	22.00001	181.717353488	154.347049374	0.1425359933	1.8105040806	180	348.00001	777.346456589	9.00001	660.262377877	0.4476768461	0.0136309599	0.025862097	0.8493798001	0.0304482129	-0.6834748146	5.0273136414
Oh	ENST00000564996	30.00001	2.00001	23.2351592223	10.2508057938	0.1951075886	1.2911471668	99	121.00001	434.192369305	3.00001	191.555461804	0.278678343	0.0156613128	0.024793469	0.4411764815	0.0561985284	0.0002018606	14.9968649687
Oh	ENST00000326266	121.00001	4.00001	56.0591972093	49.3699794503	0.0810210991	2.1584328	84	640.00001	684.055680233	18.00001	602.431296864	0.9355963681	0.0298789424	0.0281250152	0.8806758196	0.0319357186	-0.5836596926	4.5586956412
Oh	ENST00000548884	0.00001	0.00001	0.0936202843	0.0936202843	0.0001068145	0.0001068145	90	0.00001	1.4750395909	0.00001	1.4750395909	6.77947904725E-006	6.77947904725E-006	1	1	1	1.0961773073	4.7017326442
Oh	ENST00000303391	151.00001	8.00001	10.3150881533	7.3664922466	1.0859999213	14.638751289	105	243.00001	143.428844798	6.00001	102.429320762	1.6942199482	0.058577075	0.0246913982	0.7141472896	0.0345746578	-0.3894261588	7.5412930272
Oh	ENST00000266000	157.00001	25.00001	62.587874505	52.8994631466	0.4725947772	2.5084732665	96	556.00001	1448.64851198	67.00001	1224.40215741	0.3838060133	0.0547205913	0.1205036129	0.8452030615	0.1425735642	1.6287461712	4.5485555663
Oh	ENST00000264645	51.00001	20.00001	30.4635570481	31.3688048615	0.6375764103	1.6741318133	81	679.00001	793.932949735	39.00001	817.525272379	0.855235962	0.0477049595	0.0574374218	1.0297157621	0.0557798802	0.3320748944	7.3023923096
Oh	ENST00000361813	185.00001	15.00001	72.9067780061	58.1581489208	0.2579175967	2.5374871179	93	546.00001	2391.02874106	21.00001	1907.33714203	0.2283535955	0.0110101196	0.0384615561	0.7977056525	0.0482152232	0.0804797475	4.2617605863
Oh	ENST00000242719	140.00001	6.00001	75.7198446984	56.7558369163	0.1057161752	1.8489209871	105	55.00001	334.609599429	3.00001	250.806745992	0.1643706878	0.0119614406	0.0545456264	0.7495503608	0.0727711296	0.5012241389	11.1417338094
Oh	ENST00000439220	54.00001	4.00001	61.6736847632	58.1368426579	0.068803358	0.8755761912	105	948.00001	794.122112379	13.00001	748.581059747	1.1937710778	0.0173662021	0.0137130906	0.9426523303	0.014547347	-1.7202994452	5.0040072677
Oh	ENST00000284268	56.00001	5.00001	18.3123249202	13.0825309423	0.3821898088	3.0580502609	132	384.00001	205.042547212	27.00001	146.484702521	1.8727820895	0.1843196562	0.0703125242	0.7144112503	0.0984202365	0.9798069077	9.5263070656
Oh	ENST00000607016	209.00001	7.00001	37.5567896214	21.6375569107	0.3235120318	5.5649061623	120	233.00001	162.120141866	11.00001	93.4021206643	1.4372058112	0.1177704523	0.0472103413	0.5761290336	0.0819440413	0.6087117476	6.758439593
Oh	ENST00000492406	50.00001	6.00001	25.868606897	21.8340535895	0.274800553	1.9328450967	174	89.00001	189.405776936	13.00001	159.865426856	0.4698906836	0.081318458	0.1460675117	0.8440366996	0.173058247	1.9357785551	7.696716519
Oh	ENST00000457542	13.00001	2.00001	3.411919393	2.3520466054	0.8503275383	3.8101750079	105	73.00001	147.069973072	4.00001	101.384408913	0.4963624353	0.0394538967	0.05479465	0.6893617153	0.0794860649	0.0336643984	11.2681991258
Oh	ENST00000370113	46.00001	2.00001	11.5714288571	10.2857145714	0.1944454113	3.975309408	81	179.00001	141.714289213	29.00001	125.968257467	1.2631048781	0.2302168069	0.16201122	0.8888888916	0.1822626219	1.9780365864	5.46326934
Oh	ENST00000484952	26.00001	0.00001	39.2241093081	40.9125643166	2.44423691524E-007	0.6628578815	153	429.00001	492.736850263	30.00001	513.947376579	0.8706473035	0.0583717543	0.0699300916	1.0430463569	0.0670440879	0.3895130326	4.4720138359
Oh	ENST00000262879	154.00001	6.00001	25.1743046208	16.4142907688	0.3655357447	6.1173491113	93	678.00001	1213.78045075	21.00001	791.415911906	0.5585853764	0.0265347331	0.0309734656	0.6520255878	0.0475034511	0.0742957887	3.816131819
Oh	ENST00000376901	62.00001	2.00001	105.453737456	78.5498228648	0.0254616742	0.5879356341	90	894.00001	1032.27491887	24.00001	768.915488265	0.8660483691	0.031212806	0.0268456485	0.7448747172	0.0360404882	-0.4627361303	5.0826494625
Oh	ENST00000358932	127.00001	16.00001	80.2332666329	73.3874248479	0.2180211396	1.5828846977	135	29.00001	495.068971149	22.00001	452.827591839	0.0585777168	0.048583634	0.7586207729	0.9146757689	0.8293876352	4.2198793778	20.8056647981
Oh	ENST00000449309	45.00001	4.00001	24.1245977056	23.7520170605	0.1684071711	1.8653164935	231	85.00001	179.733474681	13.00001	176.95766823	0.4729225324	0.073463954	0.1529412761	0.9845559852	0.1553403549	1.2986707156	10.6521191328
Oh	ENST00000287461	48.00001	7.00001	40.4276857654	39.8314072202	0.1757409665	1.1873054094	141	164.00001	430.655205813	10.00001	424.303359182	0.380815111	0.023568067	0.060975667	0.9852507376	0.0618884764	0.3978035233	6.5406670185
Oh	ENST00000371320	53.00001	0.00001	6.3538765479	5.7414547858	1.74171884534E-006	8.3413660307	159	29.00001	46.5950946846	0.00001	42.1040017622	0.6223833259	2.37507115273E-007	3.44827467301E-007	0.9036144694	3.81609058909E-007	-1.0158275676	15.9906672515
Oh	ENST00000283629	92.00001	5.00001	78.8158156606	66.5033759306	0.0751843035	1.167278537	336	191.00001	380.473967266	6.00001	321.037130236	0.5020054627	0.0186894581	0.0314136633	0.8437821188	0.0372295911	-0.2850261062	25.3747592764
Oh	ENST00000394785	48.00001	8.00001	30.5086382917	29.4529761036	0.2716197498	1.5733252183	330	89.00001	149.122525953	5.00001	143.962577137	0.5968247214	0.0347313177	0.0561798813	0.9653979251	0.0581934971	0.2220736914	15.7125730535
Oh	ENST00000343348	21.00001	0.00001	6.0117767273	4.6683629442	2.14207852294E-006	3.4931453633	33	541.00001	563.285261838	17.00001	437.411461314	0.9604370053	0.038865031	0.0314233081	0.7765363146	0.0404659866	-0.2647108861	12.1263790766
Oh	ENST00000300181	114.00001	9.00001	8.5606380655	6.6558961435	1.3521860627	13.3167655411	51	116.00001	199.244654582	11.00001	154.912720046	0.5821988562	0.0710077907	0.0948276642	0.7775000056	0.1219648406	1.4001156642	12.4797679297
Oh	ENST00000356175	37.00001	1.00001	7.2658146295	6.5741789719	0.15211177	5.0923415868	45	847.00001	1365.32730016	19.00001	1235.36127524	0.6203640767	0.0153801243	0.0224321249	0.9048096197	0.0247920937	-0.9404223196	3.1626152424
Oh	ENST00000361528	40.00001	4.00001	3.8735893409	3.8383748939	1.0421102968	10.3263424385	39	186.00001	190.600460131	9.00001	188.867728754	0.9758633839	0.04765245	0.0483871479	0.9909090913	0.0488310667	-0.170361092	4.4447368129
Oh	ENST00000529930	93.00001	17.00001	15.744578747	14.5301209157	1.1699840696	5.9067956974	36	141.00001	223.922897735	17.00001	206.650608578	0.6296810707	0.0822645049	0.1205674383	0.9228650159	0.1306447164	1.4998676844	5.8387942078
Oh	ENST00000269740	113.00001	8.00001	17.7303597403	12.9627165979	0.6171553578	6.3732497059	33	499.00001	507.1957453	12.00001	370.812256618	0.9838410803	0.0323614168	0.0240481158	0.7311028534	0.0328929311	-0.3550733936	14.8719746935
Oh	ENST00000392102	42.00001	2.00001	9.25186243	9.0990538937	0.2198041712	4.5396275958	69	477.00001	482.571780952	13.00001	474.601376281	0.9884540059	0.0273914292	0.0272536892	0.9834834837	0.0277113847	-0.6987875669	8.5571065447
Oh	ENST00000487099	11.00001	0.00001	2.2247191481	1.717821125	5.82132787539E-006	4.9444488351	33	44.00001	97.213485197	2.00001	75.0635776447	0.4526122061	0.0266442136	0.0454547624	0.7721519035	0.0588676427	0.4219256288	7.7164365406
Oh	ENST00000297625	13.00001	3.00001	1.3987184386	1.0245390075	2.928155959	9.2942293756	57	109.00001	52.6114444264	4.00001	38.5370461769	2.0717927665	0.1037964867	0.0366973361	0.7324840935	0.0500998403	-0.3449567182	5.1693170705
Oh	ENST00000366962	40.00001	2.00001	31.2047753947	23.277264102	0.0859211801	1.281855405	81	336.00001	629.488925864	33.00001	469.568512872	0.5337663558	0.0702773059	0.0982143126	0.7459519836	0.131663049	1.4639577722	4.3129123062
Oh	ENST00000369063	45.00001	8.00001	10.3448279429	9.274673365	0.8625651476	4.3500008167	60	115.00001	205.172420868	7.00001	183.947688407	0.5605042311	0.0380543515	0.0608696469	0.8965517277	0.0678930674	0.3450850569	2.7160988463
Oh	ENST00000458549	22.00001	3.00001	23.327596702	14.0484292015	0.2135477182	0.9430894353	72	120.00001	370.001603246	6.00001	222.823696502	0.324322946	0.026927163	0.0500000792	0.6022235973	0.0830257721	0.7974490534	12.1100969075
Oh	ENST00000303407	92.00001	3.00001	13.163482086	9.3152867569	0.322052351	6.9890329473	75	643.00001	382.618545966	8.00001	270.764335067	1.6805249426	0.0295460257	0.012441695	0.7076612933	0.0175814265	-1.3448934672	5.9876627622
Oh	ENST00000498286	12.00001	0.00001	3.1599889804	3.1699364797	3.15463734497E-006	3.7974847617	36	448.00001	182.401586145	66.00001	182.975777911	2.4561190474	0.3607035355	0.1473214476	1.0031479538	0.1468591418	1.7032117406	8.8134555227
Oh	ENST00000512111	23.00001	0.00001	6.6813560339	5.3491526441	1.8694549708E-006	3.4424164621	33	308.00001	376.990452579	9.00001	301.821885553	0.8169968441	0.0298189443	0.0292208107	0.800608831	0.0364982369	-0.4195451616	6.0948395245
Oh	ENST00000296440	8.00001	0.00001	1.2011760311	0.6442671693	1.55215110705E-005	6.6601478826	39	117.00001	197.331662337	2.00001	105.841532139	0.5929104768	0.0188962684	0.0170941011	0.5363636574	0.0318703567	-1.0990813672	2.9493432843
Oh	ENST00000332439	16.00001	2.00001	10.377315654	9.210316509	0.2171488893	1.5418255099	63	140.00001	112.997437122	38.00001	100.290113098	1.2389662418	0.378900859	0.2714286235	0.8875432545	0.3058201638	2.8055732265	11.6844918224
Oh	ENST00000373983	11.00001	2.00001	4.3926248265	3.797180141	0.5267092752	2.5041997518	36	261.00001	239.276035686	8.00001	206.840840458	1.0907904306	0.0386771296	0.0306513781	0.8644444475	0.0354578923	-0.478664597	7.0399999259
Oh	ENST00000432807	88.00001	2.00001	34.1295657652	24.3234788087	0.0822254915	2.5784098926	126	7.00001	68.8008706696	0.00001	49.0330445826	0.1017430438	2.03944096989E-007	1.42856938776E-006	0.7126805825	2.00450162796E-006	-0.6830047925	10.4844425912
Oh	ENST00000262241	27.00001	2.00001	5.2554745256	3.9635037226	0.5046065653	5.1375018314	42	486.00001	182.314913898	16.00001	137.495831521	2.665717245	0.1163672369	0.0329218306	0.7541666701	0.0436532558	-0.0043291601	4.4750778468
Oh	ENST00000377990	24.00001	0.00001	4.4309903386	3.4540791021	2.89512767496E-006	5.4163986301	51	185.00001	197.483157642	9.00001	153.943564688	0.9367887986	0.0584630479	0.0486487001	0.7795275634	0.062407928	0.3088441323	7.7887787494
Oh	ENST00000377045	39.00001	4.00001	7.2497967046	6.5052889748	0.6148858284	5.3794625683	30	370.00001	439.821000081	16.00001	394.654197803	0.8412513498	0.0405418467	0.0432432691	0.897306399	0.0481923111	-0.0330048937	2.9077711275
Oh	ENST00000261211	55.00001	2.00001	6.4301179456	6.1558817176	0.3248941568	8.5534994016	30	328.00001	336.723843086	5.00001	322.363005944	0.9740920245	0.0155104956	0.0152439325	0.9573512912	0.0159230291	-1.4634351881	2.5399484372
Oh	ENST00000367505	32.00001	0.00001	8.958755795	7.2389946507	1.38140729238E-006	3.5719256928	48	604.00001	942.722406681	20.00001	761.753374602	0.6406976282	0.0262552299	0.0331125988	0.8080357157	0.0409791277	-0.2991622468	4.8993807291
Oh	ENST00000366503	9.00001	0.00001	4.345035677	3.3159484153	3.01572845766E-006	2.0713316688	114	19.00001	44.5556728636	2.00001	34.0030148897	0.4264330169	0.0588186079	0.1052636288	0.7631579259	0.1379316459	0.747065505	10.1868757463
Oh	ENST00000333957	54.00001	3.00001	15.5978360978	15.9542382619	0.1880384354	3.4620193251	93	321.00001	503.491440491	21.00001	514.995949058	0.6375480975	0.0407770392	0.0654205899	1.0228494621	0.0639591575	0.5332727699	11.4058354429
Oh	ENST00000350082	17.00001	1.00001	19.0124266187	12.8122958143	0.0780508048	0.8941525635	120	58.00001	300.713214353	1.00001	202.647812129	0.1928748297	0.004934719	0.0172415488	0.6738906122	0.0255850852	-0.7919347042	3.6568578371
Oh	ENST00000394907	1.00001	1.00001	1.1673867386	0.9551347972	1.0469831095	0.8566227172	123	2.00001	3.2933593356	0.00001	2.6945672735	0.607285691	3.71117102857E-006	0.000005	0.8181819835	6.11107932115E-006	-0.5551934696	5.6812932369
Oh	ENST00000368607	7.00001	2.00001	8.2705486644	8.126713048	0.2461031893	0.8463779471	126	73.00001	77.9138195605	9.00001	76.5587967295	0.93693276	0.1175568372	0.1232877913	0.9826086972	0.1254698759	0.8460916245	6.9798926678
Oh	ENST00000479665	61.00001	6.00001	8.5225246218	7.3208671632	0.8195764062	7.1575046958	87	88.00001	115.39694258	5.00001	99.1262243476	0.762585282	0.0504408398	0.056818289	0.8590021723	0.0661445231	0.5377899787	17.4293058806
Oh	ENST00000431474	5.00001	0.00001	3.371187089	2.139407428	4.67419149307E-006	1.4831600466	153	7.00001	35.2762779703	1.00001	22.3868711907	0.1984339166	0.0446694847	0.1428583673	0.6346154549	0.2251101297	0.7751923668	15.5712839679
Oh	ENST00000294964	18.00001	1.00001	8.0311754676	5.9928061631	0.166868404	2.2412671809	102	38.00001	116.609518309	2.00001	87.0131953677	0.3258739985	0.0229851345	0.0526318283	0.7461929063	0.0705338094	0.3694236255	11.2455932874
Oh	ENST00000617897	0.00001	0.00001	8.66728797763E-007	0.0866737465	0.0001153752	11.5376344086	93	0.00001	0.000003178	0.00001	0.3178037372	3.146627566	0.000031466	1	100001	9.999900001E-006	-1.2308944317	3.9999998889
Oh	ENST00000366835	63.00001	10.00001	6.9341145144	6.6530017765	1.5030824184	9.0855162356	128	321.00001	131.260620847	34.00001	125.939244566	2.4455164689	0.2699715257	0.105919031	0.9594594613	0.1103944828	0.6933738911	5.8626390911
Oh	ENST00000357628	48.00001	5.00001	38.5941181765	38.8588240588	0.1286711608	1.2437130907	216	258.00001	340.200004667	30.00001	342.533338	0.758377444	0.087582745	0.116279104	1.0068587105	0.115487012	1.3451266371	6.7905771336
Oh	ENST00000614363	194.00001	43.00001	205.901071043	176.48663254	0.2436445717	0.9422001013	114	14.00001	409.99599234	16.00001	351.425136725	0.0341466996	0.0455289287	1.1428570408	0.8571428582	1.3333332126	4.2942594481	6.8500603345
Oh	ENST00000347230	7.00001	0.00001	3.776744276	2.8325582295	3.53037755623E-006	1.8534508795	87	127.00001	330.747294697	15.00001	248.060472991	0.3839789835	0.0604691663	0.1181103057	0.750000006	0.1574804063	0.7464043827	5.9046454407
Oh	ENST00000396852	33.00001	4.00001	14.2284636636	13.4190600663	0.2980842161	2.3192953772	135	76.00001	220.5938848	20.00001	208.04513125	0.344524555	0.0961330356	0.2631579917	0.9431137742	0.2790310129	2.033661269	4.475142298
Oh	ENST00000289865	46.00001	4.00001	8.4191348747	8.8018228018	0.4544524572	5.4637454661	105	74.00001	136.069256023	1.00001	142.254221854	0.5438407776	0.0070297386	0.0135136468	1.0454545429	0.012926097	-1.7286153049	6.5506829148
Oh	ENST00000406341	61.00001	4.00001	26.1877849909	21.4744759663	0.1862681076	2.329330641	81	346.00001	1399.26831408	16.00001	1147.42632077	0.2472720968	0.0139442592	0.0462428021	0.8200187978	0.0563923684	0.2008224087	8.6509090647
Oh	ENST00000361272	336.00001	15.00001	55.9814843339	46.4342544771	0.3230375973	6.0019846561	120	54.00001	399.801100618	1.00001	331.61796739	0.135067187	0.0030155483	0.0185187003	0.8294573649	0.0223262835	-0.9289428341	3.1494985341
Oh	ENST00000296564	88.00001	4.00001	47.061435721	27.8420589075	0.1436678952	1.8698964163	96	788.00001	3333.51836357	11.00001	1972.14583928	0.2363868814	0.0055776859	0.0139594034	0.591610912	0.0235955813	-0.9053823964	10.7032766666
Oh	ENST00000341119	12.00001	1.00001	9.9990115921	10.3260820494	0.0968431197	1.2001196208	189	73.00001	53.7513004104	8.00001	55.5095204351	1.3581068633	0.1441196021	0.1095891631	1.0327102789	0.1061180133	0.9149863555	8.6926042457
Oh	ENST00000268989	24.00001	3.00001	13.8642815176	8.0752623936	0.3715061943	1.7310677059	102	152.00001	428.841256745	5.00001	249.778949527	0.3544435327	0.0200177397	0.0328948005	0.5824508384	0.0564765269	0.0061761613	49.4474514419
Oh	ENST00000352511	83.00001	30.00001	36.63192637	13.9099908316	2.1567239234	2.2657833815	162	165.00001	347.777177513	2.00001	132.059048759	0.4744417422	0.015144816	0.012121272	0.3797231598	0.0319213397	-0.5787049069	7.6222434552
Oh	ENST00000378230	99.00001	2.00001	32.1962954561	27.0649131398	0.0738967825	3.0748882316	201	338.00001	444.821455132	11.00001	373.926685518	0.7598554568	0.0294175581	0.0325444073	0.8406219646	0.0387146764	-0.3220366926	5.3681917016
Oh	ENST00000447648	18.00001	0.00001	5.5575869836	4.5191957587	2.21278309991E-006	3.2388175036	96	153.00001	202.446684182	4.00001	164.621120501	0.755754586	0.0242982795	0.0261438545	0.8131578997	0.0321510183	-0.7783018027	4.0032016649
Oh	ENST00000372409	29.00001	1.00001	13.5245727849	12.7906812668	0.0781827003	2.144245919	144	218.00001	198.548242133	6.00001	187.774306931	1.0979699828	0.0319533066	0.0275229804	0.9457364362	0.0291021677	-0.7984568007	3.5318675104
Oh	ENST00000320934	48.00001	1.00001	6.8530868789	4.9946226931	0.200217326	7.0041443875	90	78.00001	179.474730817	5.00001	130.80361875	0.4346016269	0.0382253186	0.0641026841	0.728813567	0.0879548447	0.6423195216	3.3105022742
Oh	ENST00000262435	67.00001	4.00001	23.19396878	18.9376288211	0.2112202134	2.8886824258	90	99.00001	578.818376443	5.00001	472.599048136	0.1710381253	0.0105798139	0.0505051464	0.8164893641	0.0618564658	0.3141730866	8.6632709013
Oh	ENST00000311413	34.00001	4.00001	14.6480092142	11.5134559311	0.3474204465	2.3211352139	168	223.00001	113.434880879	3.00001	89.1607509903	1.9658856982	0.0336472043	0.013452959	0.7860082393	0.0171155446	-1.5076290761	4.7216090147
Oh	ENST00000562435	149.00001	3.00001	25.3466115519	16.0205856196	0.1872596964	5.8784981848	102	203.00001	391.878494288	7.00001	247.690818844	0.518017735	0.0282610798	0.0344828062	0.6320602494	0.0545562013	0.2998452025	8.2040133474
Oh	ENST00000373275	34.00001	0.00001	9.5580353958	8.0745102223	1.23846521023E-006	3.5572174188	84	358.00001	615.355421675	34.00001	519.844658121	0.5817776157	0.0654041731	0.0949720923	0.844787646	0.1124212609	1.0032357495	31.1648932026
Oh	ENST00000218056	38.00001	4.00001	32.3474580932	25.4491530085	0.1571765472	1.174744856	99	212.00001	476.063095372	7.00001	374.539554882	0.4453191437	0.0186896415	0.0330189135	0.7867435189	0.0419690951	-0.0588930949	4.6774066614
Oh	ENST00000361443	7.00001	0.00001	0.9924158751	0.3780634831	2.64505842207E-005	7.05350466	81	28.00001	18.0350144224	4.00001	6.8704870012	1.5525360471	0.5822018147	0.142857449	0.3809526757	0.3750005134	0.5660001373	10.5016283224
Oh	ENST00000291906	140.00001	6.00001	65.8204452356	52.0551119022	0.1152626472	2.1269988299	267	400.00001	657.957933834	11.00001	520.356156056	0.6079416167	0.0211393867	0.0275000243	0.7908653871	0.0347720671	-0.5064213665	7.8739448066
Oh	ENST00000320895	230.00001	8.00001	262.248000336	175.492800336	0.0455859727	0.8770324643	84	1706.00001	5045.15200646	35.00001	3376.14720646	0.3381464043	0.0103668495	0.0205158322	0.6691864194	0.030657873	-0.854570144	4.3171557508
Oh	ENST00000344924	67.00001	10.00001	38.0433549173	32.6371940502	0.3063991955	1.76114883	117	105.00001	253.297209236	3.00001	217.302343292	0.414532834	0.0138056956	0.0285715211	0.8578947393	0.0333042269	-0.5161717765	4.6260869404
Oh	ENST00000335965	41.00001	1.00001	46.579826116	35.1707713106	0.0284329846	0.8802095976	108	68.00001	445.958705592	2.00001	336.72756977	0.1524805081	0.0059395493	0.0294119074	0.7550644612	0.038952843	-0.3003502265	5.5505952263
Oh	ENST00000397463	73.00001	24.00001	30.504495706	28.8989959704	0.8304790251	2.3930902089	138	74.00001	93.9450048916	5.00001	89.0005310682	0.7876949933	0.0561795524	0.0675676936	0.9473684223	0.0713214542	0.6675739167	8.355437555
Oh	ENST00000392446	63.00001	1.00001	36.2721405996	22.5802586808	0.0442869151	1.736870473	123	323.00001	355.349019696	19.00001	221.213103336	0.9089655299	0.0858900748	0.0588235586	0.6225234659	0.0944921144	1.0293118396	9.1919694555
Oh	ENST00000361735	55.00001	9.00001	22.3624890171	23.2281337421	0.3874616058	2.4594762219	96	682.00001	488.946504656	92.00001	507.873465882	1.3948356385	0.1811475026	0.1348973734	1.0387096769	0.1298701421	1.5079350172	4.1364670048
Oh	ENST00000539826	29.00001	2.00001	26.5027659988	16.1942226675	0.1235014512	1.0942257877	84	138.00001	1422.3151086	5.00001	869.089949822	0.0970249203	0.0057531559	0.0362319539	0.6110389636	0.0592956523	0.1723181116	2.9636718634
Oh	ENST00000550831	5.00001	0.00001	7.4688804979	5.8921170125	1.69718285955E-006	0.669445709	120	20.00001	45.8713743914	0.00001	36.1874186515	0.4360019787	2.76339135884E-007	0.0000005	0.7888889123	6.33802481155E-007	-0.8815259315	4.279114492
Oh	ENST00000358812	36.00001	0.00001	16.563934623	12.8852460984	7.76081413088E-007	2.1733972525	90	250.00001	255.45268063	11.00001	198.719128717	0.9786548702	0.0553545603	0.0440000382	0.7779097414	0.056561881	0.3051468938	3.104438622
Oh	ENST00000264451	70.00001	5.00001	26.302348128	24.7738823834	0.2018258553	2.6613597257	66	538.00001	679.875847067	17.00001	640.367323426	0.791320963	0.026547279	0.031598531	0.9418886201	0.0335480548	-0.5000964371	6.5090673455
Oh	ENST00000296861	131.00001	11.00001	47.2280949847	33.0392215494	0.332937929	2.7737729003	147	271.00001	631.956890033	7.00001	442.096250256	0.4288267353	0.0158336787	0.0258302942	0.6995671022	0.0369232546	-0.3728840809	8.9104040427
Oh	ENST00000227756	30.00001	3.00001	15.6697287819	12.2300322963	0.2452986163	1.9145200544	87	188.00001	328.343857121	3.00001	256.268377887	0.5725705108	0.0117065165	0.0159574992	0.7804878097	0.0204455457	-1.1857269586	3.6774192701
Oh	ENST00000268797	36.00001	2.00001	12.8904049247	6.9976485748	0.2858117236	2.7927757282	87	73.00001	171.427568942	3.00001	93.0606827705	0.4258358819	0.0322371372	0.0410960218	0.5428571574	0.075703196	0.396687522	3.6031268575
Oh	ENST00000428135	70.00001	2.00001	27.3378954837	17.6083060547	0.1135833279	2.5605485997	159	165.00001	493.973419652	4.00001	318.167693681	0.3340260901	0.0125720181	0.0242424834	0.6440988139	0.0376378327	-0.3907424064	3.8325259383
Oh	ENST00000358154	140.00001	6.00001	87.8918921867	67.7837840786	0.0885168936	1.5928660371	96	401.00001	875.256759693	5.00001	675.01351645	0.458151286	0.0074072739	0.0124688526	0.7712177129	0.0161677466	-1.8504707341	15.3014612749
Oh	ENST00000362065	34.00001	5.00001	30.3496219996	25.9088123492	0.192984917	1.1202778737	120	232.00001	772.144966373	31.00001	659.163367518	0.3004617269	0.0470293277	0.133620727	0.853678255	0.1565235218	1.7437333312	11.4328062488
Oh	ENST00000318709	18.00001	0.00001	9.550415487	7.1128617774	1.40590388411E-006	1.8847358028	93	203.00001	199.839876749	6.00001	148.834720633	1.0158133267	0.0403132413	0.0295566981	0.744769878	0.0396856787	-0.3030936638	11.5244641669
Oh	ENST00000368073	43.00001	4.00001	40.2143208208	36.7898200901	0.1087260006	1.0692710737	129	700.00001	558.947885516	67.00001	511.349980012	1.2523529083	0.1310257409	0.0957142986	0.9148437507	0.1046236568	1.1722395667	4.3160220836
Oh	ENST00000392222	134.00001	6.00001	247.754099508	196.573771639	0.0305229429	0.5408589011	126	1278.00001	1331.18670926	63.00001	1056.19399524	0.9600456503	0.0596481426	0.0492957821	0.7934228819	0.0621305274	0.2540520847	5.6582877616
Oh	ENST00000424310	14.00001	0.00001	21.7082759369	14.135621633	7.07432630813E-007	0.6449157934	96	109.00001	450.220597816	5.00001	293.166902826	0.2421035611	0.0170551653	0.0458716472	0.651162795	0.0704457434	0.6630138246	21.410861739
Oh	ENST00000378392	11.00001	1.00001	9.1907401037	10.2833454941	0.09724559	1.1968579109	186	87.00001	115.131314202	2.00001	128.818252695	0.7556589674	0.0155258277	0.022988618	1.1188811106	0.0205460775	-1.3256205876	9.2779719469
Oh	ENST00000294753	24.00001	5.00001	16.4336586151	11.6812223332	0.428038253	1.4604179484	237	56.00001	122.247004803	4.00001	86.8944935588	0.4580890149	0.0460329514	0.0714287372	0.7108108186	0.1004890969	0.7520984839	6.5679163904
Oh	ENST00000608872	134.00001	9.00001	18.4727512672	11.8187788444	0.7615008385	7.253928127	108	91.00001	233.304006745	2.00001	149.266799479	0.3900490663	0.0133988938	0.0219781295	0.6397952678	0.0343518162	-0.3725308703	5.7333333224
Oh	ENST00000233027	28.00001	1.00001	27.5146113472	17.6419020852	0.0566837972	1.0176414868	93	232.00001	747.036490878	6.00001	478.987126507	0.3105604784	0.0125264536	0.025862111	0.6411830377	0.0403349893	-0.1275275965	11.4357681659
Oh	ENST00000376649	232.00001	21.00001	27.6924770811	25.5205181168	0.8228676982	8.3777268939	117	790.00001	303.670496539	29.00001	279.853202938	2.6015039953	0.1036257927	0.036708873	0.9215686283	0.0398330323	-0.1573904855	24.7168927248
Oh	ENST00000304743	37.00001	1.00001	27.7029183195	17.7424724646	0.0563624941	1.3355997218	177	344.00001	1099.50848133	11.00001	704.185700925	0.3128670818	0.0156208937	0.0319767723	0.6404549968	0.0499282112	0.031933491	6.5398167263
Oh	ENST00000318584	27.00001	2.00001	12.2521010834	7.7548021639	0.2579059991	2.2037044762	81	168.00001	224.924374211	5.00001	142.362849601	0.7469177611	0.0351215926	0.0297619625	0.6329365152	0.0470220343	-0.1236214344	5.7093877085
Oh	ENST00000261520	8.00001	1.00001	7.2575948065	6.4452768706	0.1551539244	1.1022949356	96	134.00001	222.868640516	8.00001	197.923710567	0.6012510764	0.0404196646	0.0597015627	0.8880733965	0.0672259331	0.2476327744	6.5536912438
Oh	ENST00000394206	37.00001	1.00001	18.9245289434	17.3849063019	0.0575217365	1.9551350584	102	149.00001	103.899374591	9.00001	95.4465444025	1.4340799508	0.0942937228	0.0604027476	0.9186440706	0.0657520682	0.5176043072	10.1049249814
Oh	ENST00000350908	9.00001	1.00001	8.4438972669	7.1679306255	0.1395116739	1.0658597228	99	118.00001	183.121691232	11.00001	155.449970231	0.6443802982	0.0707623809	0.0932204158	0.8488888956	0.1098146251	0.6870970125	10.7610609946
Oh	ENST00000233615	29.00001	5.00001	18.7001554173	17.6707891113	0.2829534079	1.5507897851	111	27.00001	136.292123717	5.00001	128.789805325	0.1981039642	0.0388230263	0.185185487	0.944954131	0.1959729905	2.0369969336	3.5590768048
Oh	ENST00000308660	59.00001	4.00001	13.5829364585	11.1163015682	0.3598328073	4.3436859313	138	56.00001	74.9030046735	3.00001	61.3007644447	0.747633693	0.0489391939	0.0535715976	0.8184019414	0.065458786	0.5584680046	3.4266834271
Oh	ENST00000247161	27.00001	1.00001	11.4812618961	10.4894251614	0.0953350622	2.3516587501	81	72.00001	182.282750597	5.00001	166.535811822	0.3949908028	0.0300236324	0.0694445737	0.9136125677	0.0760109659	0.6007574332	4.8108107775
Oh	ENST00000263274	66.00001	2.00001	50.118794734	53.8705677837	0.0371262098	1.3168714521	138	1116.00001	1002.01271501	49.00001	1077.02098924	1.1137583319	0.0454958729	0.0439068186	1.0748576072	0.040848963	-0.1096071256	4.8783958477
Oh	ENST00000376004	41.00001	2.00001	19.9135928592	17.8470880049	0.1120636599	2.0588956644	129	193.00001	232.788356835	8.00001	208.631075282	0.8290793089	0.0383452465	0.0414508269	0.8962264184	0.0462503961	-0.1374071301	10.9417213009
Oh	ENST00000448775	7.00001	0.00001	4.0794560312	3.1620664413	3.1624888932E-006	1.7159175014	99	26.00001	46.1926283931	0.00001	35.8048129357	0.5628605885	2.79292061041E-007	3.84615236686E-007	0.775119628	4.962011318E-007	-0.9635380874	11.0211145344
Oh	ENST00000484302	41.00001	18.00001	30.797449852	25.5627559745	0.7041498193	1.3312793818	171	224.00001	121.388778949	45.00001	100.756125888	1.8453106781	0.4466230674	0.2008928928	0.8300283334	0.2420313678	2.4109945139	5.1096773723
Oh	ENST00000356413	9.00001	4.00001	28.9663873109	27.529412521	0.1452995046	0.310705298	126	180.00001	234.259910078	20.00001	222.638661579	0.7683773546	0.0898317024	0.1111111605	0.9503916462	0.1169109187	1.3621259965	3.4376277416
Oh	ENST00000620753	101.00001	4.00001	77.615832922	55.990687404	0.0714406303	1.301281017	96	134.00001	826.285221315	1.00001	596.067526321	0.1621716165	0.001677679	0.0074627606	0.7213822914	0.0103450843	-2.0246337737	5.7680327633
Oh	ENST00000368896	25.00001	3.00001	7.5127858381	9.9588085653	0.3012418584	3.3276617408	123	0.00001	17.3465949432	0.00001	22.9943222159	5.76482014641E-007	4.3488996571E-007	1	1.3255813196	0.754386008	1.0007609604	5.265588874
Oh	ENST00000399926	0.00001	0.00001	0.1441936983	0.1441936983	6.93511583403E-005	6.93511583403E-005	108	0.00001	0.5714342857	0.00001	0.5714342857	1.74998250017E-005	1.74998250017E-005	1	1	1	1.0961773073	4.0088104844
Oh	ENST00000304842	21.00001	1.00001	11.1720232514	10.2646508507	0.0974227	1.8796962312	120	72.00001	103.527415463	2.00001	95.1190978828	0.6954680524	0.0210263769	0.0277779128	0.91878173	0.0302334188	-0.7551211553	5.1884150058
Oh	ENST00000397640	30.00001	5.00001	19.991953159	17.0945688531	0.292491144	1.5006042562	144	9.00001	51.5070459859	1.00001	44.0422572535	0.1747335695	0.0227056936	0.1111120988	0.8550724743	0.1299446563	1.2471089908	11.0764330426
Oh	ENST00000228705	30.00001	0.00001	13.1748781568	7.0266017519	1.42316305279E-006	2.2770616656	93	139.00001	218.731310474	3.00001	116.656700054	0.6354829114	0.0257165683	0.0215828042	0.5333333385	0.0404677575	-0.2646228781	14.817072719
Oh	ENST00000254235	9.00001	1.00001	5.7008800293	2.7184753372	0.367856933	1.5787053847	162	56.00001	114.087981821	2.00001	54.4030681688	0.4908493349	0.0367628163	0.0357144579	0.4768518761	0.0748963351	-0.2261704705	10.9340417335
Oh	ENST00000223023	135.00001	6.00001	20.1997747035	20.5467871048	0.292016945	6.6832433521	81	446.00001	378.309360805	4.00001	384.808346149	1.1789293531	0.0103948109	0.0089686321	1.0171790234	0.0088171619	-2.349453922	25.9098785706
Oh	ENST00000266971	10.00001	0.00001	12.0596452157	9.3857873477	1.06544071686E-006	0.8292126195	129	168.00001	153.035962931	17.00001	119.104913862	1.0977812455	0.1427313907	0.1011905297	0.778280553	0.1300180626	1.1255785624	13.781788238
Oh	ENST00000441876	14.00001	1.00001	24.2601358615	21.3547304561	0.0468285002	0.5770787963	129	143.00001	201.791672708	7.00001	177.625006042	0.7086516905	0.039408922	0.0489511155	0.8802395245	0.0556111309	0.1661414192	35.3394490781
Oh	ENST00000263208	51.00001	4.00001	26.2272393116	23.7720209548	0.1682654583	1.9445435867	93	427.00001	860.986684069	13.00001	780.386881453	0.495942641	0.0166584169	0.0304449876	0.9063867025	0.0335894023	-0.4109506669	5.5523672486
Oh	ENST00000266529	217.00001	12.00001	32.8834159934	28.417077734	0.4222816333	6.5990713995	102	67.00001	210.518339644	7.00001	181.925017258	0.3182621054	0.0384774458	0.1044777456	0.8641765728	0.120898609	1.3406763322	5.0406022885
Oh	ENST00000257536	4.00001	0.00001	1.5340913474	1.3149355033	7.60493573663E-006	2.607413181	81	5.00001	22.0265214448	0.00001	18.8798764232	0.2269995293	5.29664483806E-007	0.000002	0.857142898	2.33332855557E-006	-0.7444990669	8.9183954506
Oh	ENST00000322886	29.00001	1.00001	17.8452963972	16.3045298467	0.0613332619	1.62507864	132	365.00001	369.749133685	7.00001	337.824917657	0.987155822	0.020720822	0.0191781091	0.9136597949	0.0209904268	-0.9629671589	11.9825833673
Oh	ENST00000277570	39.00001	0.00001	15.2673270297	13.099010198	7.63416460391E-007	2.5544753135	99	367.00001	201.559559877	5.00001	172.933397261	1.8208018028	0.028912923	0.0136240051	0.8579766565	0.0158792258	-1.4598603977	6.5936221865
