# Supplementary material for: TASEP modelling provides a parsimonious explanation for the ability of a single uORF to derepress translation during the integrated stress response
Source: eLife journal article supplement (doi:10.7554/elife.32563), 2018-06-22
Supplement: supp [file elife-32563-supp-v1.zip › elife_poa_e32563_Supplementary_file_2.csv]

Transcript	Start position (nucleotides)	End position (nucleotides)
ENST00000214869	18	35
ENST00000370128	66	83
ENST00000396354	73	90
ENST00000396475	24	53
ENST00000245680	333	359
ENST00000377843	192	212
ENST00000379170	104	127
ENST00000378757	88	105
ENST00000395074	34	84
ENST00000296003	79	102
ENST00000245796	91	150
ENST00000610322	17	40
ENST00000216223	98	199
ENST00000279146	12	44
ENST00000376573	142	171
ENST00000248378	12	47
ENST00000061240	498	515
ENST00000300291	65	85
ENST00000290219	559	582
ENST00000257897	32	61
ENST00000322776	112	129
ENST00000324288	17	73
ENST00000279263	95	118
ENST00000368885	26	46
ENST00000309422	213	254
ENST00000370179	94	111
ENST00000288723	49	66
ENST00000528838	15	101
ENST00000554659	251	274
ENST00000389879	17	49
ENST00000333007	17	43
ENST00000397588	83	118
ENST00000252936	12	35
ENST00000342315	164	208
ENST00000455036	83	106
ENST00000367619	60	77
ENST00000618527	27	71
ENST00000382456	287	304
ENST00000295087	85	255
ENST00000559228	12	59
ENST00000361523	15	74
ENST00000373491	9	38
ENST00000619426	58	78
ENST00000302850	82	114
ENST00000255175	47	91
ENST00000396478	67	90
ENST00000356860	79	129
ENST00000307358	34	51
ENST00000225740	87	110
ENST00000390308	158	223
ENST00000354831	163	189
ENST00000543227	75	128
ENST00000399022	44	64
ENST00000357365	77	100
ENST00000233468	115	135
ENST00000453396	658	702
ENST00000349703	32	52
ENST00000361114	37	63
ENST00000258796	96	134
ENST00000396319	15	47
ENST00000330288	126	143
ENST00000377838	14	40
ENST00000602728	75	104
ENST00000486685	8	58
ENST00000585513	28	60
ENST00000344843	38	67
ENST00000261318	68	88
ENST00000335181	36	68
ENST00000334133	182	271
ENST00000310931	197	238
ENST00000378526	81	107
ENST00000256367	164	268
ENST00000221232	285	305
ENST00000403825	59	217
ENST00000362074	99	116
ENST00000228506	311	358
ENST00000280557	113	136
ENST00000334295	268	354
ENST00000396203	21	95
ENST00000373279	74	100
ENST00000369046	14	31
ENST00000274605	326	352
ENST00000370966	194	214
ENST00000528372	217	234
ENST00000333479	17	34
ENST00000303319	102	149
ENST00000409302	32	97
ENST00000367837	102	152
ENST00000282096	167	238
ENST00000281543	142	174
ENST00000291672	37	66
ENST00000308025	26	49
ENST00000432176	63	89
ENST00000510164	51	113
ENST00000345254	38	82
ENST00000378863	36	116
ENST00000449549	274	300
ENST00000315480	98	145
ENST00000374492	49	90
ENST00000246151	24	47
ENST00000451237	48	209
ENST00000281382	96	149
ENST00000436390	364	468
ENST00000310473	597	707
ENST00000619594	20	40
ENST00000317269	163	180
ENST00000376810	27	47
ENST00000269468	361	378
ENST00000277165	14	58
ENST00000336308	158	178
ENST00000394264	57	77
ENST00000256015	63	140
ENST00000313093	155	196
ENST00000224337	62	94
ENST00000261593	145	195
ENST00000318430	66	287
ENST00000618655	126	155
ENST00000356998	56	157
ENST00000299314	130	153
ENST00000346246	199	216
ENST00000316763	132	152
ENST00000381334	98	118
ENST00000375040	70	171
ENST00000274963	63	143
ENST00000229238	360	389
ENST00000331373	79	171
ENST00000355716	233	289
ENST00000439853	123	185
ENST00000262630	123	176
ENST00000369563	355	429
ENST00000400334	122	178
ENST00000360845	94	144
ENST00000328557	79	201
ENST00000394987	127	198
ENST00000305352	150	206
ENST00000398013	61	174
ENST00000259089	444	554
ENST00000326974	87	179
ENST00000261439	168	245
ENST00000286835	122	178
ENST00000380338	155	214
ENST00000612662	9	320
ENST00000398844	104	154
ENST00000361835	45	113
ENST00000368875	295	324
ENST00000260952	101	391
ENST00000377223	125	232
ENST00000282570	106	156
ENST00000373087	41	112
ENST00000298875	51	104
ENST00000370267	56	190
ENST00000392038	122	211
ENST00000494664	91	159
ENST00000342665	75	137
ENST00000316495	46	225
ENST00000265070	151	219
ENST00000253727	165	227
ENST00000340027	86	148
ENST00000312006	163	219
ENST00000309534	241	318
ENST00000261558	269	382
ENST00000369842	162	245
ENST00000366647	16	129
ENST00000334351	226	396
ENST00000507416	197	283
ENST00000301998	123	155
ENST00000329565	124	162
ENST00000368494	78	107
ENST00000331495	153	188
ENST00000340258	40	81
ENST00000244519	88	129
ENST00000264414	13	60
ENST00000233575	117	146
ENST00000618852	13	60
ENST00000286639	56	202
ENST00000263390	160	192
ENST00000296490	19	60
ENST00000368521	46	84
ENST00000222803	118	150
ENST00000310574	279	314
ENST00000388948	261	314
ENST00000271843	118	159
ENST00000341114	142	180
ENST00000335791	42	146
ENST00000292577	155	286
ENST00000305103	86	232
ENST00000323557	20	214
ENST00000373095	37	180
ENST00000262644	45	155
ENST00000346473	37	141
ENST00000297661	48	134
ENST00000345146	156	245
ENST00000322428	69	248
ENST00000564996	13	111
ENST00000326266	124	207
ENST00000548884	176	265
ENST00000303391	90	194
ENST00000266000	96	191
ENST00000264645	113	193
ENST00000361813	24	116
ENST00000242719	56	160
ENST00000439220	46	150
ENST00000284268	12	143
ENST00000607016	30	149
ENST00000492406	53	226
ENST00000457542	130	234
ENST00000370113	42	122
ENST00000484952	114	266
ENST00000262879	93	185
ENST00000376901	39	128
ENST00000358932	27	161
ENST00000449309	150	380
ENST00000287461	28	168
ENST00000371320	61	219
ENST00000283629	73	408
ENST00000394785	180	509
ENST00000343348	537	569
ENST00000300181	321	371
ENST00000356175	67	111
ENST00000361528	13	51
ENST00000529930	110	145
ENST00000269740	223	255
ENST00000392102	259	327
ENST00000487099	115	147
ENST00000297625	57	113
ENST00000366962	22	102
ENST00000369063	224	283
ENST00000458549	85	156
ENST00000303407	96	170
ENST00000498286	185	220
ENST00000512111	251	283
ENST00000296440	62	100
ENST00000332439	21	83
ENST00000373983	71	106
ENST00000432807	60	185
ENST00000262241	12	53
ENST00000377990	106	156
ENST00000377045	102	131
ENST00000261211	338	367
ENST00000367505	132	179
ENST00000366503	16	129
ENST00000333957	91	183
ENST00000350082	198	317
ENST00000394907	41	163
ENST00000368607	20	145
ENST00000479665	344	430
ENST00000431474	34	186
ENST00000294964	18	119
ENST00000617897	83	175
ENST00000366835	80	207
ENST00000357628	250	465
ENST00000614363	26	139
ENST00000347230	13	99
ENST00000396852	168	302
ENST00000289865	45	149
ENST00000406341	82	162
ENST00000361272	96	215
ENST00000296564	92	187
ENST00000341119	154	342
ENST00000268989	5	106
ENST00000352511	118	279
ENST00000378230	7	207
ENST00000447648	133	228
ENST00000372409	80	223
ENST00000320934	542	631
ENST00000262435	33	122
ENST00000311413	340	507
ENST00000562435	141	242
ENST00000373275	65	148
ENST00000218056	322	420
ENST00000361443	88	168
ENST00000291906	50	316
ENST00000320895	81	164
ENST00000344924	31	147
ENST00000335965	71	178
ENST00000397463	98	235
ENST00000392446	91	213
ENST00000361735	135	230
ENST00000539826	61	144
ENST00000550831	50	169
ENST00000358812	33	122
ENST00000264451	95	160
ENST00000296861	63	209
ENST00000227756	55	141
ENST00000268797	185	271
ENST00000428135	11	169
ENST00000358154	137	232
ENST00000362065	166	285
ENST00000318709	34	126
ENST00000368073	8	136
ENST00000392222	95	220
ENST00000424310	102	197
ENST00000378392	63	248
ENST00000294753	136	372
ENST00000608872	64	171
ENST00000233027	34	126
ENST00000376649	70	186
ENST00000304743	173	349
ENST00000318584	23	103
ENST00000261520	46	141
ENST00000394206	258	359
ENST00000350908	77	175
ENST00000233615	155	265
ENST00000308660	354	491
ENST00000247161	5	85
ENST00000263274	275	412
ENST00000376004	33	161
ENST00000448775	212	310
ENST00000484302	261	431
ENST00000356413	78	203
ENST00000620753	13	108
ENST00000368896	78	200
ENST00000399926	46	153
ENST00000304842	284	403
ENST00000397640	61	204
ENST00000228705	64	156
ENST00000254235	14	175
ENST00000223023	154	234
ENST00000266971	88	216
ENST00000441876	146	274
ENST00000263208	38	130
ENST00000266529	32	133
ENST00000257536	179	259
ENST00000322886	25	156
ENST00000277570	27	125
